# Supplementary material for: Fitness advantage of Bacteroides thetaiotaomicron capsular polysaccharide in the mouse gut depends on the resident microbiota
Source: eLife. 2023 Feb 9;12:e81212. doi: 10.7554/eLife.81212 (PMC10014078; doi:10.7554/eLife.81212)
Supplement: Figure 1—source data 1. [file elife-81212-fig1-data1.xlsx]

## Sheet: Fig1
Fig.1C: Growth curve WT WITS							Fig.1C: Growth curve Acapsular WITS							Fig.1E and Fig.1F: In vivo competition of tagged strains
Well	Time	Mean_OD	logOD	Strain	Repeat		Well	Time	Mean_OD	logOD	Strain	Repeat		Sample	Target	Source	Strain	Ctm	Experiment	Microbiota	Comp Index	rel.CFU.g	fold_increase
B1	0	0.00442	-5.42161	WITS 01	2		C1	1.00836	0.00706	-4.95331	WITS 01	3		569A	WITS 01	Cecum	WT	13.9597	DH_20_011	GF	0.695272	1.35331e+10	3442.27
B1	0.168028	0.00496	-5.30635	WITS 01	2		C1	1.17644	0.00824	-4.79876	WITS 01	3		569A	WITS 02	Cecum	WT	15.885	DH_20_011	GF	0.695272	3.56307e+09	1369.45
B1	0.336	0.00502	-5.29433	WITS 01	2		C1	1.34444	0.00864	-4.75135	WITS 01	3		569A	WITS 11	Cecum	WT	14.9509	DH_20_011	GF	0.695272	6.80794e+09	3854.21
B1	0.504083	0.00528	-5.24383	WITS 01	2		C1	1.51256	0.00906	-4.70389	WITS 01	3		569A	WITS 17	Cecum	WT	16.3167	DH_20_011	GF	0.695272	2.64172e+09	2425.19
B1	0.672167	0.00636	-5.05773	WITS 01	2		C1	1.68064	0.0101	-4.59522	WITS 01	3		569A	WITS 19	Cecum	WT	14.9288	DH_20_011	GF	0.695272	6.91311e+09	4659.32
B1	0.84025	0.00664	-5.01464	WITS 01	2		C1	1.84864	0.0113	-4.48295	WITS 01	3		569A	WITS 21	Cecum	WT	14.6237	DH_20_011	GF	0.695272	8.54111e+09	4800.58
B1	1.00836	0.00756	-4.88488	WITS 01	2		C1	2.01675	0.01218	-4.40796	WITS 01	3		570A	WITS 01	Cecum	WT	14.1226	DH_20_011	GF	0.695272	1.14218e+10	2905.24
B1	1.17644	0.00936	-4.67131	WITS 01	2		C1	2.18483	0.01326	-4.323	WITS 01	3		570A	WITS 02	Cecum	WT	16.6702	DH_20_011	GF	0.695272	1.95356e+09	750.839
B1	1.34444	0.00994	-4.61119	WITS 01	2		C1	2.35283	0.01462	-4.22536	WITS 01	3		570A	WITS 11	Cecum	WT	14.4764	DH_20_011	GF	0.695272	8.9379e+09	5060.05
B1	1.51256	0.01178	-4.44135	WITS 01	2		C1	2.52092	0.01626	-4.11905	WITS 01	3		570A	WITS 17	Cecum	WT	17.0924	DH_20_011	GF	0.695272	1.45796e+09	1338.46
B1	1.68064	0.01356	-4.30063	WITS 01	2		C1	2.68903	0.01764	-4.03759	WITS 01	3		570A	WITS 19	Cecum	WT	15.1127	DH_20_011	GF	0.695272	5.75014e+09	3875.5
B1	1.84864	0.01566	-4.15665	WITS 01	2		C1	2.85703	0.01966	-3.92917	WITS 01	3		570A	WITS 21	Cecum	WT	14.8187	DH_20_011	GF	0.695272	7.0501e+09	3962.55
B1	2.01675	0.01744	-4.04899	WITS 01	2		C1	3.02511	0.02072	-3.87666	WITS 01	3		571A	WITS 01	Cecum	WT	14.1923	DH_20_011	GF	0.695272	1.0479e+10	2665.45
B1	2.18483	0.01936	-3.94455	WITS 01	2		C1	3.19322	0.02248	-3.79513	WITS 01	3		571A	WITS 02	Cecum	WT	16.3248	DH_20_011	GF	0.695272	2.38995e+09	918.563
B1	2.35283	0.02204	-3.8149	WITS 01	2		C1	3.36131	0.02404	-3.72804	WITS 01	3		571A	WITS 11	Cecum	WT	15.3379	DH_20_011	GF	0.695272	4.73659e+09	2681.55
B1	2.52092	0.0247	-3.70095	WITS 01	2		C1	3.52939	0.02582	-3.65661	WITS 01	3		571A	WITS 17	Cecum	WT	17.0308	DH_20_011	GF	0.695272	1.46506e+09	1344.98
B1	2.68903	0.02778	-3.58344	WITS 01	2		C1	3.6975	0.0274	-3.59721	WITS 01	3		571A	WITS 19	Cecum	WT	15.1414	DH_20_011	GF	0.695272	5.4276e+09	3658.11
B1	2.85703	0.03064	-3.48545	WITS 01	2		C1	3.8655	0.02976	-3.51459	WITS 01	3		571A	WITS 21	Cecum	WT	15.1219	DH_20_011	GF	0.695272	5.50176e+09	3092.3
B1	3.02514	0.03386	-3.38552	WITS 01	2		C1	4.03358	0.03144	-3.45967	WITS 01	3		572A	WITS 01	Cecum	WT	14.6793	DH_20_011	GF	0.695272	2.35892e+10	6000.14
B1	3.19322	0.03722	-3.29091	WITS 01	2		C1	4.20167	0.03344	-3.398	WITS 01	3		572A	WITS 02	Cecum	WT	17.2432	DH_20_011	GF	0.695272	3.9896e+09	1533.38
B1	3.36122	0.04062	-3.20349	WITS 01	2		C1	4.36975	0.0354	-3.34104	WITS 01	3		572A	WITS 11	Cecum	WT	15.8449	DH_20_011	GF	0.695272	1.0516e+10	5953.45
B1	3.52931	0.04434	-3.11587	WITS 01	2		C1	4.53775	0.03794	-3.27175	WITS 01	3		572A	WITS 17	Cecum	WT	16.8282	DH_20_011	GF	0.695272	5.31917e+09	4883.18
B1	3.69742	0.04814	-3.03364	WITS 01	2		C1	4.70586	0.04036	-3.20992	WITS 01	3		572A	WITS 19	Cecum	WT	15.5197	DH_20_011	GF	0.695272	1.31744e+10	8879.35
B1	3.86542	0.05194	-2.95767	WITS 01	2		C1	4.87386	0.04226	-3.16391	WITS 01	3		572A	WITS 21	Cecum	WT	15.5675	DH_20_011	GF	0.695272	1.2745e+10	7163.4
B1	4.0335	0.05558	-2.88993	WITS 01	2		C1	5.04194	0.04498	-3.10154	WITS 01	3		573A	WITS 01	Cecum	WT	13.4355	DH_20_011	GF	0.695272	7.28816e+09	1853.82
B1	4.20161	0.05976	-2.81742	WITS 01	2		C1	5.21003	0.04746	-3.04787	WITS 01	3		573A	WITS 02	Cecum	WT	15.8365	DH_20_011	GF	0.695272	1.37985e+09	530.336
B1	4.36961	0.06406	-2.74794	WITS 01	2		C1	5.37811	0.04954	-3.00497	WITS 01	3		573A	WITS 11	Cecum	WT	14.4996	DH_20_011	GF	0.695272	3.48561e+09	1973.32
B1	4.53761	0.06896	-2.67423	WITS 01	2		C1	5.54622	0.05264	-2.94428	WITS 01	3		573A	WITS 17	Cecum	WT	16.0779	DH_20_011	GF	0.695272	1.16731e+09	1071.63
B1	4.70572	0.0728	-2.62004	WITS 01	2		C1	5.71422	0.05524	-2.89607	WITS 01	3		573A	WITS 19	Cecum	WT	14.533	DH_20_011	GF	0.695272	3.40584e+09	2295.48
B1	4.87372	0.07806	-2.55028	WITS 01	2		C1	5.88231	0.05798	-2.84766	WITS 01	3		573A	WITS 21	Cecum	WT	14.5903	DH_20_011	GF	0.695272	3.27324e+09	1839.74
B1	5.04181	0.08204	-2.50055	WITS 01	2		C1	6.05042	0.06056	-2.80412	WITS 01	3		574A	WITS 01	Cecum	Acapsular	14.574	DH_20_011	GF	0.841429	9.78009e+09	2487.66
B1	5.20989	0.0866	-2.44646	WITS 01	2		C1	6.21842	0.06284	-2.76716	WITS 01	3		574A	WITS 02	Cecum	Acapsular	14.6831	DH_20_011	GF	0.841429	9.06755e+09	3485.06
B1	5.37792	0.09162	-2.39011	WITS 01	2		C1	6.3865	0.06556	-2.72479	WITS 01	3		574A	WITS 11	Cecum	Acapsular	15.0841	DH_20_011	GF	0.841429	6.86736e+09	3887.85
B1	5.546	0.0962	-2.34133	WITS 01	2		C1	6.55461	0.0682	-2.68531	WITS 01	3		574A	WITS 17	Cecum	Acapsular	16.6095	DH_20_011	GF	0.841429	2.38564e+09	2190.1
B1	5.714	0.10012	-2.30139	WITS 01	2		C1	6.72261	0.07054	-2.65158	WITS 01	3		574A	WITS 19	Cecum	Acapsular	15.8132	DH_20_011	GF	0.841429	4.14286e+09	2792.22
B1	5.88203	0.10522	-2.2517	WITS 01	2		C1	6.89069	0.073	-2.6173	WITS 01	3		574A	WITS 21	Cecum	Acapsular	15.5162	DH_20_011	GF	0.841429	5.08982e+09	2860.77
B1	6.05011	0.1095	-2.21183	WITS 01	2		C1	7.05869	0.07562	-2.58203	WITS 01	3		575A	WITS 01	Cecum	Acapsular	14.6952	DH_20_011	GF	0.841429	2.70398e+09	687.785
B1	6.21819	0.11392	-2.17226	WITS 01	2		C1	7.22678	0.07824	-2.54797	WITS 01	3		575A	WITS 02	Cecum	Acapsular	14.6015	DH_20_011	GF	0.841429	2.88538e+09	1108.98
B1	6.38622	0.11836	-2.13402	WITS 01	2		C1	7.39478	0.08154	-2.50666	WITS 01	3		575A	WITS 11	Cecum	Acapsular	14.6529	DH_20_011	GF	0.841429	2.78431e+09	1576.3
B1	6.55431	0.12244	-2.10013	WITS 01	2		C1	7.56289	0.08322	-2.48627	WITS 01	3		575A	WITS 17	Cecum	Acapsular	16.1134	DH_20_011	GF	0.841429	1.01173e+09	928.798
B1	6.72239	0.12648	-2.06767	WITS 01	2		C1	7.73097	0.08556	-2.45854	WITS 01	3		575A	WITS 19	Cecum	Acapsular	15.5652	DH_20_011	GF	0.841429	1.47943e+09	997.109
B1	6.89042	0.13164	-2.02768	WITS 01	2		C1	7.89897	0.08868	-2.42272	WITS 01	3		575A	WITS 21	Cecum	Acapsular	15.9474	DH_20_011	GF	0.841429	1.13517e+09	638.03
B1	7.0585	0.13546	-1.99908	WITS 01	2		C1	8.06708	0.0912	-2.3947	WITS 01	3		576A	WITS 01	Cecum	Acapsular	14.5998	DH_20_011	GF	0.841429	1.01999e+10	2594.44
B1	7.22658	0.13988	-1.96697	WITS 01	2		C1	8.23517	0.09328	-2.37215	WITS 01	3		576A	WITS 02	Cecum	Acapsular	15.3978	DH_20_011	GF	0.841429	5.86662e+09	2254.8
B1	7.39461	0.1437	-1.94003	WITS 01	2		C1	8.40317	0.09628	-2.34049	WITS 01	3		576A	WITS 11	Cecum	Acapsular	14.8025	DH_20_011	GF	0.841429	8.86316e+09	5017.74
B1	7.56261	0.14742	-1.91447	WITS 01	2		C1	8.57128	0.09874	-2.31527	WITS 01	3		576A	WITS 17	Cecum	Acapsular	17.6001	DH_20_011	GF	0.841429	1.2747e+09	1170.22
B1	7.73069	0.1522	-1.88256	WITS 01	2		C1	8.73936	0.10134	-2.28927	WITS 01	3		576A	WITS 19	Cecum	Acapsular	15.4334	DH_20_011	GF	0.841429	5.72352e+09	3857.56
B1	7.89881	0.15602	-1.85777	WITS 01	2		C1	8.90744	0.10404	-2.26298	WITS 01	3		576A	WITS 21	Cecum	Acapsular	15.9245	DH_20_011	GF	0.841429	4.07211e+09	2288.75
B1	8.06681	0.1606	-1.82884	WITS 01	2		C1	9.07553	0.10664	-2.2383	WITS 01	3		577A	WITS 01	Cecum	Acapsular	14.1711	DH_20_011	GF	0.841429	2.74773e+09	698.913
B1	8.23489	0.16388	-1.80862	WITS 01	2		C1	9.24356	0.10938	-2.21293	WITS 01	3		577A	WITS 02	Cecum	Acapsular	14.2175	DH_20_011	GF	0.841429	2.66084e+09	1022.68
B1	8.40289	0.1687	-1.77963	WITS 01	2		C1	9.41164	0.1123	-2.18658	WITS 01	3		577A	WITS 11	Cecum	Acapsular	15.3356	DH_20_011	GF	0.841429	1.22584e+09	693.991
B1	8.571	0.1723	-1.75852	WITS 01	2		C1	9.57964	0.11474	-2.16509	WITS 01	3		577A	WITS 17	Cecum	Acapsular	15.8964	DH_20_011	GF	0.841429	8.31037e+08	762.92
B1	8.73908	0.17612	-1.73659	WITS 01	2		C1	9.74772	0.11728	-2.14319	WITS 01	3		577A	WITS 19	Cecum	Acapsular	15.411	DH_20_011	GF	0.841429	1.16339e+09	784.106
B1	8.90708	0.18088	-1.70992	WITS 01	2		C1	9.91572	0.1197	-2.12277	WITS 01	3		577A	WITS 21	Cecum	Acapsular	15.6716	DH_20_011	GF	0.841429	9.71157e+08	545.845
B1	9.07519	0.18532	-1.68567	WITS 01	2		C1	10.0838	0.1222	-2.1021	WITS 01	3		578A	WITS 01	Cecum	Acapsular	14.3407	DH_20_011	GF	0.841429	3.9676e+09	1009.2
B1	9.24328	0.18774	-1.6727	WITS 01	2		C1	10.2518	0.12478	-2.0812	WITS 01	3		578A	WITS 02	Cecum	Acapsular	14.3717	DH_20_011	GF	0.841429	3.88335e+09	1492.55
B1	9.41139	0.19124	-1.65423	WITS 01	2		C1	10.4199	0.12734	-2.06089	WITS 01	3		578A	WITS 11	Cecum	Acapsular	15.1611	DH_20_011	GF	0.841429	2.24675e+09	1271.96
B1	9.57939	0.19446	-1.63753	WITS 01	2		C1	10.5879	0.12924	-2.04608	WITS 01	3		578A	WITS 17	Cecum	Acapsular	17.1947	DH_20_011	GF	0.841429	5.48754e+08	503.774
B1	9.74747	0.19806	-1.61919	WITS 01	2		C1	10.756	0.1315	-2.02875	WITS 01	3		578A	WITS 19	Cecum	Acapsular	16.1084	DH_20_011	GF	0.841429	1.16518e+09	785.312
B1	9.91558	0.2006	-1.60644	WITS 01	2		C1	10.9241	0.1335	-2.01365	WITS 01	3		578A	WITS 21	Cecum	Acapsular	16.3459	DH_20_011	GF	0.841429	9.88365e+08	555.516
B1	10.0836	0.2053	-1.58328	WITS 01	2		C1	11.0921	0.13504	-2.00218	WITS 01	3		Inoc1	WITS 01	Inoc	Acapsular	14.6601	DH_20_011	GF	1.05587	2.90514e+06	0.73895
B1	10.2517	0.2077	-1.57166	WITS 01	2		C1	11.2602	0.137	-1.98777	WITS 01	3		Inoc1	WITS 02	Inoc	Acapsular	14.7505	DH_20_011	GF	1.05587	2.72859e+06	1.04872
B1	10.4198	0.21094	-1.55618	WITS 01	2		C1	11.4283	0.1391	-1.97256	WITS 01	3		Inoc1	WITS 11	Inoc	Acapsular	15.6564	DH_20_011	GF	1.05587	1.45625e+06	0.824432
B1	10.5878	0.2138	-1.54271	WITS 01	2		C1	11.5964	0.13978	-1.96769	WITS 01	3		Inoc1	WITS 17	Inoc	Acapsular	16.3564	DH_20_011	GF	1.05587	896437	0.82296
B1	10.7559	0.21602	-1.53238	WITS 01	2		C1	11.7644	0.14146	-1.95574	WITS 01	3		Inoc1	WITS 19	Inoc	Acapsular	15.6337	DH_20_011	GF	1.05587	1.47943e+06	0.997109
B1	10.9239	0.21922	-1.51768	WITS 01	2		C1	11.9328	0.14292	-1.94547	WITS 01	3		Inoc1	WITS 21	Inoc	Acapsular	15.426	DH_20_011	GF	1.05587	1.70849e+06	0.960268
B1	11.092	0.22118	-1.50878	WITS 01	2		C1	12.1009	0.14438	-1.93531	WITS 01	3		Inoc1	WITS 01	Inoc	WT	15.1682	DH_20_011	GF	0.981527	3.1775e+06	0.808228
B1	11.2601	0.22524	-1.49059	WITS 01	2		C1	12.2689	0.1447	-1.93309	WITS 01	3		Inoc1	WITS 02	Inoc	WT	16.1291	DH_20_011	GF	0.981527	1.63248e+06	0.627435
B1	11.4281	0.22616	-1.48651	WITS 01	2		C1	12.4369	0.14616	-1.92305	WITS 01	3		Inoc1	WITS 11	Inoc	WT	16.332	DH_20_011	GF	0.981527	1.41828e+06	0.802936
B1	11.5961	0.22896	-1.47421	WITS 01	2		C1	12.6049	0.14698	-1.91746	WITS 01	3		Inoc1	WITS 17	Inoc	WT	16.7048	DH_20_011	GF	0.981527	1.09528e+06	1.00551
B1	11.7643	0.23232	-1.45964	WITS 01	2		C1	12.773	0.14804	-1.91027	WITS 01	3		Inoc1	WITS 19	Inoc	WT	16.2207	DH_20_011	GF	0.981527	1.53197e+06	1.03252
B1	11.9326	0.2336	-1.45414	WITS 01	2		C1	12.9411	0.14846	-1.90744	WITS 01	3		Inoc1	WITS 21	Inoc	WT	16.0187	DH_20_011	GF	0.981527	1.76221e+06	0.99046
B1	12.1006	0.2372	-1.43885	WITS 01	2		C1	13.1091	0.14944	-1.90086	WITS 01	3		Inoc2	WITS 01	Inoc	Acapsular	15.7404	DH_20_011	GF	1.05587	3.13145e+06	0.796516
B1	12.2687	0.23868	-1.43263	WITS 01	2		C1	13.2772	0.15024	-1.89552	WITS 01	3		Inoc2	WITS 02	Inoc	Acapsular	15.8096	DH_20_011	GF	1.05587	2.98491e+06	1.14723
B1	12.4367	0.2407	-1.4242	WITS 01	2		C1	13.4452	0.15122	-1.88902	WITS 01	3		Inoc2	WITS 11	Inoc	Acapsular	16.5181	DH_20_011	GF	1.05587	1.8266e+06	1.0341
B1	12.6047	0.24462	-1.40805	WITS 01	2		C1	13.6133	0.15202	-1.88374	WITS 01	3		Inoc2	WITS 17	Inoc	Acapsular	17.4841	DH_20_011	GF	1.05587	935062	0.858418
B1	12.7729	0.24686	-1.39893	WITS 01	2		C1	13.7813	0.15226	-1.88217	WITS 01	3		Inoc2	WITS 19	Inoc	Acapsular	17.2243	DH_20_011	GF	1.05587	1.11964e+06	0.754616
B1	12.9409	0.24864	-1.39175	WITS 01	2		C1	13.9494	0.15324	-1.87575	WITS 01	3		Inoc2	WITS 21	Inoc	Acapsular	16.7771	DH_20_011	GF	1.05587	1.52649e+06	0.857973
B1	13.1089	0.2517	-1.37952	WITS 01	2		C1	14.1175	0.15384	-1.87184	WITS 01	3		Inoc2	WITS 01	Inoc	WT	14.528	DH_20_011	GF	0.981527	7.01466e+06	1.78425
B1	13.2771	0.2523	-1.37714	WITS 01	2		C1	14.2856	0.15476	-1.86588	WITS 01	3		Inoc2	WITS 02	Inoc	WT	15.9917	DH_20_011	GF	0.981527	2.54331e+06	0.977508
B1	13.4451	0.2561	-1.36219	WITS 01	2		C1	14.4537	0.155	-1.86433	WITS 01	3		Inoc2	WITS 11	Inoc	WT	16.4869	DH_20_011	GF	0.981527	1.80436e+06	1.02151
B1	13.6131	0.25604	-1.36242	WITS 01	2		C1	14.6217	0.1561	-1.85726	WITS 01	3		Inoc2	WITS 17	Inoc	WT	17.4469	DH_20_011	GF	0.981527	927521	0.851496
B1	13.7812	0.25604	-1.36242	WITS 01	2		C1	14.7898	0.1564	-1.85534	WITS 01	3		Inoc2	WITS 19	Inoc	WT	15.9464	DH_20_011	GF	0.981527	2.62433e+06	1.76875
B1	13.9492	0.257	-1.35868	WITS 01	2		C1	14.9579	0.15724	-1.84998	WITS 01	3		Inoc2	WITS 21	Inoc	WT	15.7797	DH_20_011	GF	0.981527	2.9458e+06	1.6557
B1	14.1173	0.25578	-1.36344	WITS 01	2		C1	15.126	0.1581	-1.84453	WITS 01	3		Inoc3	WITS 01	Inoc	Acapsular	15.0825	DH_20_011	GF	1.05587	2.65674e+06	0.675768
B1	14.2853	0.2542	-1.36963	WITS 01	2		C1	15.294	0.15898	-1.83898	WITS 01	3		Inoc3	WITS 02	Inoc	Acapsular	15.2685	DH_20_011	GF	1.05587	2.33545e+06	0.897618
B1	14.4534	0.25274	-1.37539	WITS 01	2		C1	15.4621	0.15948	-1.83584	WITS 01	3		Inoc3	WITS 11	Inoc	Acapsular	15.3142	DH_20_011	GF	1.05587	2.26262e+06	1.28095
B1	14.6215	0.2508	-1.3831	WITS 01	2		C1	15.6301	0.16024	-1.83108	WITS 01	3		Inoc3	WITS 17	Inoc	Acapsular	17.6113	DH_20_011	GF	1.05587	460383	0.422647
B1	14.7895	0.24854	-1.39215	WITS 01	2		C1	15.7982	0.16094	-1.82672	WITS 01	3		Inoc3	WITS 19	Inoc	Acapsular	16.7122	DH_20_011	GF	1.05587	858567	0.57866
B1	14.9576	0.24542	-1.40478	WITS 01	2		C1	15.9662	0.16226	-1.81856	WITS 01	3		Inoc3	WITS 21	Inoc	Acapsular	16.2028	DH_20_011	GF	1.05587	1.22209e+06	0.686882
B1	15.1257	0.24424	-1.4096	WITS 01	2		C1	16.1343	0.1624	-1.81769	WITS 01	3		Inoc3	WITS 01	Inoc	WT	14.6736	DH_20_011	GF	0.981527	4.70313e+06	1.19629
B1	15.2937	0.23992	-1.42745	WITS 01	2		C1	16.3024	0.16298	-1.81413	WITS 01	3		Inoc3	WITS 02	Inoc	WT	15.1475	DH_20_011	GF	0.981527	3.38625e+06	1.30149
B1	15.4618	0.23812	-1.43498	WITS 01	2		C1	16.4704	0.16352	-1.81082	WITS 01	3		Inoc3	WITS 11	Inoc	WT	16.0353	DH_20_011	GF	0.981527	1.83008e+06	1.03607
B1	15.6298	0.23502	-1.44808	WITS 01	2		C1	16.6384	0.16416	-1.80691	WITS 01	3		Inoc3	WITS 17	Inoc	WT	15.756	DH_20_011	GF	0.981527	2.22102e+06	2.03897
B1	15.7979	0.23354	-1.4544	WITS 01	2		C1	16.8065	0.16512	-1.80108	WITS 01	3		Inoc3	WITS 19	Inoc	WT	16.5417	DH_20_011	GF	0.981527	1.28837e+06	0.868338
B1	15.9659	0.23156	-1.46292	WITS 01	2		C1	16.9745	0.1658	-1.79697	WITS 01	3		Inoc3	WITS 21	Inoc	WT	16.3126	DH_20_011	GF	0.981527	1.51001e+06	0.848712
B1	16.134	0.22816	-1.47771	WITS 01	2		C1	17.1426	0.16616	-1.7948	WITS 01	3
B1	16.3021	0.22676	-1.48386	WITS 01	2		C1	17.3107	0.16694	-1.79012	WITS 01	3
B1	16.4701	0.22476	-1.49272	WITS 01	2		C1	17.4788	0.1672	-1.78856	WITS 01	3
B1	16.6382	0.22258	-1.50247	WITS 01	2		C1	17.6469	0.16752	-1.78665	WITS 01	3
B1	16.8062	0.22064	-1.51122	WITS 01	2		C1	17.8149	0.1672	-1.78856	WITS 01	3
B1	16.9743	0.219	-1.51868	WITS 01	2		C1	17.983	0.16706	-1.7894	WITS 01	3
B1	17.1423	0.21702	-1.52777	WITS 01	2		C1	18.1511	0.16826	-1.78224	WITS 01	3
B1	17.3104	0.21382	-1.54262	WITS 01	2		C1	18.3191	0.16822	-1.78248	WITS 01	3
B1	17.4784	0.21254	-1.54863	WITS 01	2		C1	18.4872	0.16766	-1.78582	WITS 01	3
B1	17.6464	0.21014	-1.55998	WITS 01	2		C1	18.6553	0.16602	-1.79565	WITS 01	3
B1	17.8146	0.21026	-1.55941	WITS 01	2		C1	18.8233	0.16562	-1.79806	WITS 01	3
B1	17.9826	0.20764	-1.57195	WITS 01	2		C1	18.9914	0.16474	-1.80339	WITS 01	3
B1	18.1506	0.20568	-1.58143	WITS 01	2		C1	19.1594	0.16324	-1.81253	WITS 01	3
B1	18.3186	0.20392	-1.59003	WITS 01	2		C1	19.3275	0.16154	-1.823	WITS 01	3
B1	18.4868	0.20358	-1.5917	WITS 01	2		C1	19.4955	0.16014	-1.83171	WITS 01	3
B1	18.6548	0.20112	-1.60385	WITS 01	2		C1	19.6636	0.15918	-1.83772	WITS 01	3
B1	18.8229	0.20098	-1.60455	WITS 01	2		C1	19.8316	0.15778	-1.84655	WITS 01	3
B1	18.9909	0.19828	-1.61808	WITS 01	2		C1	19.9997	0.15546	-1.86137	WITS 01	3
B1	19.159	0.19754	-1.62181	WITS 01	2		C2	1.17644	0.00726	-4.92538	WITS 02	3
B1	19.327	0.19604	-1.62944	WITS 01	2		C2	1.34444	0.00778	-4.8562	WITS 02	3
B1	19.4951	0.19394	-1.64021	WITS 01	2		C2	1.51256	0.00794	-4.83584	WITS 02	3
B1	19.6632	0.19284	-1.64589	WITS 01	2		C2	1.68064	0.00862	-4.75367	WITS 02	3
B1	19.8312	0.1923	-1.6487	WITS 01	2		C2	1.84864	0.00962	-4.64391	WITS 02	3
B1	19.9993	0.19114	-1.65475	WITS 01	2		C2	2.01675	0.01046	-4.5602	WITS 02	3
B2	0	0.0048	-5.33914	WITS 02	2		C2	2.18483	0.0113	-4.48295	WITS 02	3
B2	0.168028	0.00548334	-5.20604	WITS 02	2		C2	2.35283	0.01258	-4.37565	WITS 02	3
B2	0.336	0.0055	-5.20301	WITS 02	2		C2	2.52092	0.01434	-4.2447	WITS 02	3
B2	0.504083	0.00591667	-5.12998	WITS 02	2		C2	2.68903	0.0155	-4.16692	WITS 02	3
B2	0.672167	0.00655	-5.02829	WITS 02	2		C2	2.85703	0.01704	-4.07219	WITS 02	3
B2	0.84025	0.00746667	-4.89731	WITS 02	2		C2	3.02511	0.01832	-3.99976	WITS 02	3
B2	1.00836	0.00863334	-4.75212	WITS 02	2		C2	3.19322	0.02012	-3.90604	WITS 02	3
B2	1.17644	0.0102167	-4.58373	WITS 02	2		C2	3.36131	0.02162	-3.83414	WITS 02	3
B2	1.34444	0.0114167	-4.47268	WITS 02	2		C2	3.52939	0.02366	-3.74397	WITS 02	3
B2	1.51256	0.0130833	-4.33642	WITS 02	2		C2	3.6975	0.02508	-3.68568	WITS 02	3
B2	1.68064	0.0147167	-4.21877	WITS 02	2		C2	3.8655	0.02732	-3.60014	WITS 02	3
B2	1.84864	0.0168	-4.08638	WITS 02	2		C2	4.03358	0.02918	-3.53427	WITS 02	3
B2	2.01675	0.0188333	-3.97213	WITS 02	2		C2	4.20167	0.03122	-3.4667	WITS 02	3
B2	2.18483	0.0208167	-3.872	WITS 02	2		C2	4.36975	0.0329	-3.41428	WITS 02	3
B2	2.35283	0.02345	-3.75288	WITS 02	2		C2	4.53775	0.0352	-3.34671	WITS 02	3
B2	2.52092	0.0259667	-3.65094	WITS 02	2		C2	4.70586	0.03748	-3.28395	WITS 02	3
B2	2.68903	0.02875	-3.54912	WITS 02	2		C2	4.87386	0.03954	-3.23044	WITS 02	3
B2	2.85703	0.0319333	-3.4441	WITS 02	2		C2	5.04194	0.04226	-3.16391	WITS 02	3
B2	3.02514	0.03465	-3.36246	WITS 02	2		C2	5.21003	0.04464	-3.10912	WITS 02	3
B2	3.19322	0.0377	-3.2781	WITS 02	2		C2	5.37811	0.04684	-3.06102	WITS 02	3
B2	3.36122	0.0410333	-3.19337	WITS 02	2		C2	5.54622	0.04986	-2.99854	WITS 02	3
B2	3.52931	0.0440833	-3.12167	WITS 02	2		C2	5.71422	0.05238	-2.94923	WITS 02	3
B2	3.69742	0.0478167	-3.04038	WITS 02	2		C2	5.88231	0.05524	-2.89607	WITS 02	3
B2	3.86542	0.0513333	-2.96941	WITS 02	2		C2	6.05042	0.05734	-2.85876	WITS 02	3
B2	4.0335	0.0549333	-2.90163	WITS 02	2		C2	6.21842	0.0602	-2.81008	WITS 02	3
B2	4.20161	0.0592167	-2.82655	WITS 02	2		C2	6.3865	0.06264	-2.77035	WITS 02	3
B2	4.36961	0.0632833	-2.76013	WITS 02	2		C2	6.55461	0.06546	-2.72632	WITS 02	3
B2	4.53761	0.0676167	-2.6939	WITS 02	2		C2	6.72261	0.0679	-2.68972	WITS 02	3
B2	4.70572	0.0715167	-2.63782	WITS 02	2		C2	6.89069	0.07074	-2.64874	WITS 02	3
B2	4.87372	0.0760667	-2.57615	WITS 02	2		C2	7.05869	0.07328	-2.61347	WITS 02	3
B2	5.04181	0.08035	-2.52136	WITS 02	2		C2	7.22678	0.07602	-2.57676	WITS 02	3
B2	5.20989	0.0845	-2.471	WITS 02	2		C2	7.39478	0.07938	-2.53351	WITS 02	3
B2	5.37792	0.0890333	-2.41874	WITS 02	2		C2	7.56289	0.08104	-2.51281	WITS 02	3
B2	5.546	0.0932	-2.37301	WITS 02	2		C2	7.73097	0.08364	-2.48123	WITS 02	3
B2	5.714	0.0973333	-2.32961	WITS 02	2		C2	7.89897	0.08686	-2.44346	WITS 02	3
B2	5.88203	0.102017	-2.28262	WITS 02	2		C2	8.06708	0.08966	-2.41173	WITS 02	3
B2	6.05011	0.105617	-2.24794	WITS 02	2		C2	8.23517	0.09212	-2.38466	WITS 02	3
B2	6.21819	0.109883	-2.20834	WITS 02	2		C2	8.40317	0.09448	-2.35937	WITS 02	3
B2	6.38622	0.114383	-2.1682	WITS 02	2		C2	8.57128	0.09742	-2.32872	WITS 02	3
B2	6.55431	0.117783	-2.13891	WITS 02	2		C2	8.73936	0.10004	-2.30219	WITS 02	3
B2	6.72239	0.121983	-2.10387	WITS 02	2		C2	8.90744	0.10318	-2.27128	WITS 02	3
B2	6.89042	0.125817	-2.07293	WITS 02	2		C2	9.07553	0.10594	-2.24488	WITS 02	3
B2	7.0585	0.130117	-2.03932	WITS 02	2		C2	9.24356	0.10866	-2.21953	WITS 02	3
B2	7.22658	0.134067	-2.00942	WITS 02	2		C2	9.41164	0.11186	-2.19051	WITS 02	3
B2	7.39461	0.137817	-1.98183	WITS 02	2		C2	9.57964	0.11432	-2.16875	WITS 02	3
B2	7.56261	0.14105	-1.95864	WITS 02	2		C2	9.74772	0.11612	-2.15313	WITS 02	3
B2	7.73069	0.145067	-1.93056	WITS 02	2		C2	9.91572	0.11914	-2.12746	WITS 02	3
B2	7.89881	0.1493	-1.9018	WITS 02	2		C2	10.0838	0.12258	-2.09899	WITS 02	3
B2	8.06681	0.153133	-1.87645	WITS 02	2		C2	10.2518	0.12468	-2.082	WITS 02	3
B2	8.23489	0.1564	-1.85534	WITS 02	2		C2	10.4199	0.12814	-2.05463	WITS 02	3
B2	8.40289	0.1596	-1.83508	WITS 02	2		C2	10.5879	0.12908	-2.04732	WITS 02	3
B2	8.571	0.16385	-1.8088	WITS 02	2		C2	10.756	0.1315	-2.02875	WITS 02	3
B2	8.73908	0.166833	-1.79076	WITS 02	2		C2	10.9241	0.13414	-2.00887	WITS 02	3
B2	8.90708	0.171233	-1.76473	WITS 02	2		C2	11.0921	0.13624	-1.99334	WITS 02	3
B2	9.07519	0.174067	-1.74832	WITS 02	2		C2	11.2602	0.13792	-1.98108	WITS 02	3
B2	9.24328	0.177683	-1.72775	WITS 02	2		C2	11.4283	0.1402	-1.96469	WITS 02	3
B2	9.41139	0.1812	-1.70815	WITS 02	2		C2	11.5964	0.14136	-1.95645	WITS 02	3
B2	9.57939	0.183983	-1.69291	WITS 02	2		C2	11.7644	0.143	-1.94491	WITS 02	3
B2	9.74747	0.187367	-1.67469	WITS 02	2		C2	11.9328	0.14516	-1.92992	WITS 02	3
B2	9.91558	0.189917	-1.66117	WITS 02	2		C2	12.1009	0.147	-1.91732	WITS 02	3
B2	10.0836	0.193283	-1.6436	WITS 02	2		C2	12.2689	0.14722	-1.91583	WITS 02	3
B2	10.2517	0.19475	-1.63604	WITS 02	2		C2	12.4369	0.14894	-1.90421	WITS 02	3
B2	10.4198	0.197917	-1.61991	WITS 02	2		C2	12.6049	0.15038	-1.89459	WITS 02	3
B2	10.5878	0.20085	-1.6052	WITS 02	2		C2	12.773	0.15112	-1.88968	WITS 02	3
B2	10.7559	0.202917	-1.59496	WITS 02	2		C2	12.9411	0.15246	-1.88085	WITS 02	3
B2	10.9239	0.204833	-1.58556	WITS 02	2		C2	13.1091	0.15402	-1.87067	WITS 02	3
B2	11.092	0.207717	-1.57158	WITS 02	2		C2	13.2772	0.15438	-1.86834	WITS 02	3
B2	11.2601	0.210633	-1.55764	WITS 02	2		C2	13.4452	0.15584	-1.85893	WITS 02	3
B2	11.4281	0.212333	-1.5496	WITS 02	2		C2	13.6133	0.15606	-1.85751	WITS 02	3
B2	11.5961	0.214867	-1.53774	WITS 02	2		C2	13.7813	0.1563	-1.85598	WITS 02	3
B2	11.7643	0.21745	-1.52579	WITS 02	2		C2	13.9494	0.15774	-1.84681	WITS 02	3
B2	11.9326	0.219433	-1.51671	WITS 02	2		C2	14.1175	0.15768	-1.84719	WITS 02	3
B2	12.1006	0.221717	-1.50635	WITS 02	2		C2	14.2856	0.16008	-1.83208	WITS 02	3
B2	12.2687	0.224667	-1.49314	WITS 02	2		C2	14.4537	0.16008	-1.83208	WITS 02	3
B2	12.4367	0.226567	-1.48472	WITS 02	2		C2	14.6217	0.1608	-1.82759	WITS 02	3
B2	12.6047	0.2285	-1.47622	WITS 02	2		C2	14.7898	0.16104	-1.8261	WITS 02	3
B2	12.7729	0.23035	-1.46816	WITS 02	2		C2	14.9579	0.16232	-1.81819	WITS 02	3
B2	12.9409	0.2324	-1.4593	WITS 02	2		C2	15.126	0.1632	-1.81278	WITS 02	3
B2	13.1089	0.235067	-1.44789	WITS 02	2		C2	15.294	0.16404	-1.80764	WITS 02	3
B2	13.2771	0.236667	-1.4411	WITS 02	2		C2	15.4621	0.16462	-1.80412	WITS 02	3
B2	13.4451	0.238483	-1.43346	WITS 02	2		C2	15.6301	0.16552	-1.79866	WITS 02	3
B2	13.6131	0.238333	-1.43409	WITS 02	2		C2	15.7982	0.16592	-1.79625	WITS 02	3
B2	13.7812	0.23905	-1.43108	WITS 02	2		C2	15.9662	0.16778	-1.7851	WITS 02	3
B2	13.9492	0.238083	-1.43513	WITS 02	2		C2	16.1343	0.16816	-1.78284	WITS 02	3
B2	14.1173	0.23745	-1.4378	WITS 02	2		C2	16.3024	0.16854	-1.78058	WITS 02	3
B2	14.2853	0.235983	-1.44399	WITS 02	2		C2	16.4704	0.1692	-1.77667	WITS 02	3
B2	14.4534	0.233367	-1.45514	WITS 02	2		C2	16.6384	0.1697	-1.77372	WITS 02	3
B2	14.6215	0.231133	-1.46476	WITS 02	2		C2	16.8065	0.17104	-1.76586	WITS 02	3
B2	14.7895	0.230167	-1.46895	WITS 02	2		C2	16.9745	0.1712	-1.76492	WITS 02	3
B2	14.9576	0.228267	-1.47724	WITS 02	2		C2	17.1426	0.17182	-1.76131	WITS 02	3
B2	15.1257	0.226067	-1.48693	WITS 02	2		C2	17.3107	0.17266	-1.75643	WITS 02	3
B2	15.2937	0.224083	-1.49574	WITS 02	2		C2	17.4788	0.17274	-1.75597	WITS 02	3
B2	15.4618	0.221933	-1.50538	WITS 02	2		C2	17.6469	0.17314	-1.75365	WITS 02	3
B2	15.6298	0.219667	-1.51564	WITS 02	2		C2	17.8149	0.17314	-1.75365	WITS 02	3
B2	15.7979	0.218667	-1.52021	WITS 02	2		C2	17.983	0.173	-1.75446	WITS 02	3
B2	15.9659	0.216567	-1.52986	WITS 02	2		C2	18.1511	0.1744	-1.7464	WITS 02	3
B2	16.134	0.213667	-1.54334	WITS 02	2		C2	18.3191	0.17472	-1.74457	WITS 02	3
B2	16.3021	0.212733	-1.54772	WITS 02	2		C2	18.4872	0.1741	-1.74813	WITS 02	3
B2	16.4701	0.210967	-1.55606	WITS 02	2		C2	18.6553	0.1727	-1.7562	WITS 02	3
B2	16.6382	0.209717	-1.562	WITS 02	2		C2	18.8233	0.17216	-1.75933	WITS 02	3
B2	16.8062	0.20675	-1.57624	WITS 02	2		C2	18.9914	0.17122	-1.76481	WITS 02	3
B2	16.9743	0.205483	-1.58239	WITS 02	2		C2	19.1594	0.17014	-1.77113	WITS 02	3
B2	17.1423	0.20365	-1.59135	WITS 02	2		C2	19.3275	0.16882	-1.77892	WITS 02	3
B2	17.3104	0.20205	-1.59924	WITS 02	2		C2	19.4955	0.16658	-1.79228	WITS 02	3
B2	17.4784	0.200717	-1.60586	WITS 02	2		C2	19.6636	0.16576	-1.79721	WITS 02	3
B2	17.6464	0.198533	-1.6168	WITS 02	2		C2	19.8316	0.16404	-1.80764	WITS 02	3
B2	17.8146	0.197167	-1.62371	WITS 02	2		C2	19.9997	0.1623	-1.81831	WITS 02	3
B2	17.9826	0.195933	-1.62998	WITS 02	2		C3	2.01675	0.00706	-4.95331	WITS 11	3
B2	18.1506	0.194433	-1.63767	WITS 02	2		C3	2.18483	0.00752	-4.89019	WITS 11	3
B2	18.3186	0.19245	-1.64792	WITS 02	2		C3	2.35283	0.00822	-4.80118	WITS 11	3
B2	18.4868	0.191567	-1.65252	WITS 02	2		C3	2.52092	0.00938	-4.66918	WITS 11	3
B2	18.6548	0.189883	-1.66135	WITS 02	2		C3	2.68903	0.01026	-4.5795	WITS 11	3
B2	18.8229	0.1886	-1.66813	WITS 02	2		C3	2.85703	0.01168	-4.44988	WITS 11	3
B2	18.9909	0.187083	-1.6762	WITS 02	2		C3	3.02511	0.01266	-4.36931	WITS 11	3
B2	19.159	0.186083	-1.68156	WITS 02	2		C3	3.19322	0.01398	-4.27013	WITS 11	3
B2	19.327	0.185917	-1.68246	WITS 02	2		C3	3.36131	0.01552	-4.16563	WITS 11	3
B2	19.4951	0.183367	-1.69627	WITS 02	2		C3	3.52939	0.01712	-4.06751	WITS 11	3
B2	19.6632	0.18185	-1.70457	WITS 02	2		C3	3.6975	0.01866	-3.98137	WITS 11	3
B2	19.8312	0.181267	-1.70779	WITS 02	2		C3	3.8655	0.02124	-3.85187	WITS 11	3
B2	19.9993	0.180017	-1.71471	WITS 02	2		C3	4.03358	0.02268	-3.78627	WITS 11	3
B3	0	0.003	-5.80914	WITS 11	2		C3	4.20167	0.02464	-3.70338	WITS 11	3
B3	0.168028	0.00442	-5.42162	WITS 11	2		C3	4.36975	0.02642	-3.63363	WITS 11	3
B3	0.336	0.00356	-5.63799	WITS 11	2		C3	4.53775	0.02862	-3.55365	WITS 11	3
B3	0.504083	0.00396	-5.53151	WITS 11	2		C3	4.70586	0.0307	-3.48349	WITS 11	3
B3	0.672167	0.0047	-5.36019	WITS 11	2		C3	4.87386	0.03252	-3.4259	WITS 11	3
B3	0.84025	0.00556	-5.19216	WITS 11	2		C3	5.04194	0.035	-3.35241	WITS 11	3
B3	1.00836	0.00632	-5.06404	WITS 11	2		C3	5.21003	0.0374	-3.28608	WITS 11	3
B3	1.17644	0.00762	-4.87698	WITS 11	2		C3	5.37811	0.03948	-3.23196	WITS 11	3
B3	1.34444	0.00954	-4.65226	WITS 11	2		C3	5.54622	0.04238	-3.16108	WITS 11	3
B3	1.51256	0.01072	-4.53564	WITS 11	2		C3	5.71422	0.04486	-3.10421	WITS 11	3
B3	1.68064	0.0125	-4.38203	WITS 11	2		C3	5.88231	0.0475	-3.04703	WITS 11	3
B3	1.84864	0.01448	-4.23499	WITS 11	2		C3	6.05042	0.0499	-2.99773	WITS 11	3
B3	2.01675	0.0167	-4.09235	WITS 11	2		C3	6.21842	0.05214	-2.95382	WITS 11	3
B3	2.18483	0.01902	-3.96226	WITS 11	2		C3	6.3865	0.055	-2.90042	WITS 11	3
B3	2.35283	0.02136	-3.84624	WITS 11	2		C3	6.55461	0.05796	-2.848	WITS 11	3
B3	2.52092	0.024	-3.7297	WITS 11	2		C3	6.72261	0.0603	-2.80842	WITS 11	3
B3	2.68903	0.0272	-3.60454	WITS 11	2		C3	6.89069	0.06266	-2.77003	WITS 11	3
B3	2.85703	0.0304	-3.49331	WITS 11	2		C3	7.05869	0.06544	-2.72662	WITS 11	3
B3	3.02514	0.0336	-3.39323	WITS 11	2		C3	7.22678	0.06816	-2.6859	WITS 11	3
B3	3.19322	0.0368	-3.30226	WITS 11	2		C3	7.39478	0.07186	-2.63304	WITS 11	3
B3	3.36122	0.04076	-3.20005	WITS 11	2		C3	7.56289	0.07368	-2.60802	WITS 11	3
B3	3.52931	0.04448	-3.11272	WITS 11	2		C3	7.73097	0.07638	-2.57203	WITS 11	3
B3	3.69742	0.0483	-3.03032	WITS 11	2		C3	7.89897	0.07932	-2.53427	WITS 11	3
B3	3.86542	0.05186	-2.95921	WITS 11	2		C3	8.06708	0.08226	-2.49787	WITS 11	3
B3	4.0335	0.05618	-2.87919	WITS 11	2		C3	8.23517	0.0842	-2.47456	WITS 11	3
B3	4.20161	0.06014	-2.81108	WITS 11	2		C3	8.40317	0.08752	-2.43589	WITS 11	3
B3	4.36961	0.06454	-2.74047	WITS 11	2		C3	8.57128	0.09022	-2.4055	WITS 11	3
B3	4.53761	0.0695	-2.66643	WITS 11	2		C3	8.73936	0.09262	-2.37925	WITS 11	3
B3	4.70572	0.07346	-2.61101	WITS 11	2		C3	8.90744	0.09548	-2.34884	WITS 11	3
B3	4.87372	0.07906	-2.53755	WITS 11	2		C3	9.07553	0.09806	-2.32218	WITS 11	3
B3	5.04181	0.08306	-2.48819	WITS 11	2		C3	9.24356	0.10112	-2.29145	WITS 11	3
B3	5.20989	0.08746	-2.43657	WITS 11	2		C3	9.41164	0.10402	-2.26317	WITS 11	3
B3	5.37792	0.09266	-2.37882	WITS 11	2		C3	9.57964	0.10682	-2.23661	WITS 11	3
B3	5.546	0.09738	-2.32913	WITS 11	2		C3	9.74772	0.1091	-2.21549	WITS 11	3
B3	5.714	0.10118	-2.29085	WITS 11	2		C3	9.91572	0.1117	-2.19194	WITS 11	3
B3	5.88203	0.10614	-2.243	WITS 11	2		C3	10.0838	0.1149	-2.16369	WITS 11	3
B3	6.05011	0.1103	-2.20455	WITS 11	2		C3	10.2518	0.11766	-2.13996	WITS 11	3
B3	6.21819	0.11434	-2.16858	WITS 11	2		C3	10.4199	0.12034	-2.11743	WITS 11	3
B3	6.38622	0.11866	-2.13149	WITS 11	2		C3	10.5879	0.12286	-2.09671	WITS 11	3
B3	6.55431	0.1235	-2.09151	WITS 11	2		C3	10.756	0.12544	-2.07593	WITS 11	3
B3	6.72239	0.12638	-2.06846	WITS 11	2		C3	10.9241	0.1282	-2.05416	WITS 11	3
B3	6.89042	0.13192	-2.02556	WITS 11	2		C3	11.0921	0.13004	-2.03991	WITS 11	3
B3	7.0585	0.13552	-1.99864	WITS 11	2		C3	11.2602	0.13252	-2.02102	WITS 11	3
B3	7.22658	0.13958	-1.96912	WITS 11	2		C3	11.4283	0.13554	-1.99849	WITS 11	3
B3	7.39461	0.14348	-1.94156	WITS 11	2		C3	11.5964	0.13686	-1.9888	WITS 11	3
B3	7.56261	0.14846	-1.90744	WITS 11	2		C3	11.7644	0.13878	-1.97487	WITS 11	3
B3	7.73069	0.15252	-1.88046	WITS 11	2		C3	11.9328	0.14132	-1.95673	WITS 11	3
B3	7.89881	0.15644	-1.85508	WITS 11	2		C3	12.1009	0.14324	-1.94323	WITS 11	3
B3	8.06681	0.16056	-1.82909	WITS 11	2		C3	12.2689	0.14386	-1.93891	WITS 11	3
B3	8.23489	0.16556	-1.79842	WITS 11	2		C3	12.4369	0.14556	-1.92717	WITS 11	3
B3	8.40289	0.16836	-1.78165	WITS 11	2		C3	12.6049	0.14752	-1.91379	WITS 11	3
B3	8.571	0.17294	-1.75481	WITS 11	2		C3	12.773	0.1485	-1.90717	WITS 11	3
B3	8.73908	0.17602	-1.73716	WITS 11	2		C3	12.9411	0.14924	-1.9022	WITS 11	3
B3	8.90708	0.18148	-1.70661	WITS 11	2		C3	13.1091	0.15066	-1.89273	WITS 11	3
B3	9.07519	0.1855	-1.6847	WITS 11	2		C3	13.2772	0.15182	-1.88506	WITS 11	3
B3	9.24328	0.18678	-1.67782	WITS 11	2		C3	13.4452	0.15308	-1.87679	WITS 11	3
B3	9.41139	0.19062	-1.65747	WITS 11	2		C3	13.6133	0.15348	-1.87419	WITS 11	3
B3	9.57939	0.19514	-1.63404	WITS 11	2		C3	13.7813	0.15394	-1.87119	WITS 11	3
B3	9.74747	0.19866	-1.61616	WITS 11	2		C3	13.9494	0.15552	-1.86098	WITS 11	3
B3	9.91558	0.20066	-1.60614	WITS 11	2		C3	14.1175	0.15556	-1.86072	WITS 11	3
B3	10.0836	0.20324	-1.59337	WITS 11	2		C3	14.2856	0.15634	-1.85572	WITS 11	3
B3	10.2517	0.20714	-1.57436	WITS 11	2		C3	14.4537	0.15704	-1.85125	WITS 11	3
B3	10.4198	0.20874	-1.56667	WITS 11	2		C3	14.6217	0.15794	-1.84554	WITS 11	3
B3	10.5878	0.21302	-1.54637	WITS 11	2		C3	14.7898	0.1582	-1.8439	WITS 11	3
B3	10.7559	0.21514	-1.53647	WITS 11	2		C3	14.9579	0.1588	-1.84011	WITS 11	3
B3	10.9239	0.21592	-1.53285	WITS 11	2		C3	15.126	0.15984	-1.83358	WITS 11	3
B3	11.092	0.21938	-1.51695	WITS 11	2		C3	15.294	0.1601	-1.83196	WITS 11	3
B3	11.2601	0.22322	-1.4996	WITS 11	2		C3	15.4621	0.16104	-1.8261	WITS 11	3
B3	11.4281	0.22542	-1.48979	WITS 11	2		C3	15.6301	0.16202	-1.82004	WITS 11	3
B3	11.5961	0.22748	-1.48069	WITS 11	2		C3	15.7982	0.16204	-1.81991	WITS 11	3
B3	11.7643	0.23012	-1.46915	WITS 11	2		C3	15.9662	0.1636	-1.81033	WITS 11	3
B3	11.9326	0.23308	-1.45637	WITS 11	2		C3	16.1343	0.1639	-1.8085	WITS 11	3
B3	12.1006	0.23468	-1.44953	WITS 11	2		C3	16.3024	0.16418	-1.80679	WITS 11	3
B3	12.2687	0.23782	-1.43624	WITS 11	2		C3	16.4704	0.16494	-1.80217	WITS 11	3
B3	12.4367	0.23812	-1.43498	WITS 11	2		C3	16.6384	0.16548	-1.7989	WITS 11	3
B3	12.6047	0.24114	-1.42238	WITS 11	2		C3	16.8065	0.1661	-1.79517	WITS 11	3
B3	12.7729	0.24328	-1.41354	WITS 11	2		C3	16.9745	0.16648	-1.79288	WITS 11	3
B3	12.9409	0.24674	-1.39942	WITS 11	2		C3	17.1426	0.1666	-1.79216	WITS 11	3
B3	13.1089	0.24906	-1.39006	WITS 11	2		C3	17.3107	0.16746	-1.78701	WITS 11	3
B3	13.2771	0.24956	-1.38806	WITS 11	2		C3	17.4788	0.16754	-1.78653	WITS 11	3
B3	13.4451	0.25112	-1.38182	WITS 11	2		C3	17.6469	0.16896	-1.77809	WITS 11	3
B3	13.6131	0.25164	-1.37976	WITS 11	2		C3	17.8149	0.16854	-1.78058	WITS 11	3
B3	13.7812	0.25118	-1.38159	WITS 11	2		C3	17.983	0.16872	-1.77951	WITS 11	3
B3	13.9492	0.25122	-1.38143	WITS 11	2		C3	18.1511	0.16984	-1.7729	WITS 11	3
B3	14.1173	0.2496	-1.3879	WITS 11	2		C3	18.3191	0.17084	-1.76703	WITS 11	3
B3	14.2853	0.2473	-1.39715	WITS 11	2		C3	18.4872	0.17012	-1.77125	WITS 11	3
B3	14.4534	0.2448	-1.40731	WITS 11	2		C3	18.6553	0.1696	-1.77431	WITS 11	3
B3	14.6215	0.24288	-1.41519	WITS 11	2		C3	18.8233	0.17014	-1.77113	WITS 11	3
B3	14.7895	0.241	-1.42296	WITS 11	2		C3	18.9914	0.1696	-1.77431	WITS 11	3
B3	14.9576	0.23772	-1.43666	WITS 11	2		C3	19.1594	0.1685	-1.78082	WITS 11	3
B3	15.1257	0.23602	-1.44384	WITS 11	2		C3	19.3275	0.1675	-1.78677	WITS 11	3
B3	15.2937	0.23404	-1.45226	WITS 11	2		C3	19.4955	0.16664	-1.79192	WITS 11	3
B3	15.4618	0.23212	-1.4605	WITS 11	2		C3	19.6636	0.16614	-1.79492	WITS 11	3
B3	15.6298	0.22764	-1.47999	WITS 11	2		C3	19.8316	0.16446	-1.80509	WITS 11	3
B3	15.7979	0.22642	-1.48536	WITS 11	2		C3	19.9997	0.16182	-1.82127	WITS 11	3
B3	15.9659	0.22334	-1.49906	WITS 11	2		C4	1.68064	0.0069	-4.97623	WITS 17	3
B3	16.134	0.2219	-1.50553	WITS 11	2		C4	1.84864	0.0076	-4.87961	WITS 17	3
B3	16.3021	0.2209	-1.51005	WITS 11	2		C4	2.01675	0.00816	-4.80851	WITS 17	3
B3	16.4701	0.2187	-1.52005	WITS 11	2		C4	2.18483	0.00856	-4.76065	WITS 17	3
B3	16.6382	0.21676	-1.52896	WITS 11	2		C4	2.35283	0.0097	-4.63563	WITS 17	3
B3	16.8062	0.21406	-1.5415	WITS 11	2		C4	2.52092	0.01098	-4.51168	WITS 17	3
B3	16.9743	0.21296	-1.54665	WITS 11	2		C4	2.68903	0.01176	-4.44305	WITS 17	3
B3	17.1423	0.21062	-1.5577	WITS 11	2		C4	2.85703	0.01334	-4.31699	WITS 17	3
B3	17.3104	0.20824	-1.56906	WITS 11	2		C4	3.02511	0.0144	-4.24053	WITS 17	3
B3	17.4784	0.20678	-1.5761	WITS 11	2		C4	3.19322	0.01586	-4.14395	WITS 17	3
B3	17.6464	0.20456	-1.58689	WITS 11	2		C4	3.36131	0.01794	-4.02072	WITS 17	3
B3	17.8146	0.20304	-1.59435	WITS 11	2		C4	3.52939	0.01952	-3.93632	WITS 17	3
B3	17.9826	0.2015	-1.60197	WITS 11	2		C4	3.6975	0.02124	-3.85187	WITS 17	3
B3	18.1506	0.20002	-1.60934	WITS 11	2		C4	3.8655	0.02468	-3.70176	WITS 17	3
B3	18.3186	0.19782	-1.6204	WITS 11	2		C4	4.03358	0.02726	-3.60233	WITS 17	3
B3	18.4868	0.19776	-1.6207	WITS 11	2		C4	4.20167	0.02942	-3.52608	WITS 17	3
B3	18.6548	0.19574	-1.63097	WITS 11	2		C4	4.36975	0.03238	-3.43021	WITS 17	3
B3	18.8229	0.19382	-1.64083	WITS 11	2		C4	4.53775	0.03478	-3.35871	WITS 17	3
B3	18.9909	0.19326	-1.64372	WITS 11	2		C4	4.70586	0.03802	-3.26964	WITS 17	3
B3	19.159	0.19124	-1.65423	WITS 11	2		C4	4.87386	0.04052	-3.20596	WITS 17	3
B3	19.327	0.19026	-1.65936	WITS 11	2		C4	5.04194	0.04384	-3.12721	WITS 17	3
B3	19.4951	0.18924	-1.66474	WITS 11	2		C4	5.21003	0.04718	-3.05379	WITS 17	3
B3	19.6632	0.18692	-1.67707	WITS 11	2		C4	5.37811	0.04986	-2.99854	WITS 17	3
B3	19.8312	0.18558	-1.68427	WITS 11	2		C4	5.54622	0.05348	-2.92845	WITS 17	3
B3	19.9993	0.18554	-1.68448	WITS 11	2		C4	5.71422	0.05734	-2.85876	WITS 17	3
B4	0	0.0046	-5.3817	WITS 17	2		C4	5.88231	0.06062	-2.80313	WITS 17	3
B4	0.168028	0.00438	-5.43071	WITS 17	2		C4	6.05042	0.06462	-2.73923	WITS 17	3
B4	0.336	0.0044	-5.42615	WITS 17	2		C4	6.21842	0.06764	-2.69356	WITS 17	3
B4	0.504083	0.0048	-5.33914	WITS 17	2		C4	6.3865	0.07148	-2.63834	WITS 17	3
B4	0.672167	0.00586	-5.13961	WITS 17	2		C4	6.55461	0.07644	-2.57125	WITS 17	3
B4	0.84025	0.00668	-5.00864	WITS 17	2		C4	6.72261	0.07974	-2.52898	WITS 17	3
B4	1.00836	0.00744	-4.90088	WITS 17	2		C4	6.89069	0.08302	-2.48867	WITS 17	3
B4	1.17644	0.00932	-4.67559	WITS 17	2		C4	7.05869	0.08666	-2.44576	WITS 17	3
B4	1.34444	0.0106	-4.5469	WITS 17	2		C4	7.22678	0.09078	-2.39932	WITS 17	3
B4	1.51256	0.01212	-4.4129	WITS 17	2		C4	7.39478	0.0956	-2.34758	WITS 17	3
B4	1.68064	0.01414	-4.25875	WITS 17	2		C4	7.56289	0.09958	-2.30679	WITS 17	3
B4	1.84864	0.01606	-4.13142	WITS 17	2		C4	7.73097	0.1029	-2.274	WITS 17	3
B4	2.01675	0.01858	-3.98567	WITS 17	2		C4	7.89897	0.10714	-2.23362	WITS 17	3
B4	2.18483	0.02058	-3.88344	WITS 17	2		C4	8.06708	0.11072	-2.20075	WITS 17	3
B4	2.35283	0.02348	-3.75161	WITS 17	2		C4	8.23517	0.11264	-2.18356	WITS 17	3
B4	2.52092	0.02682	-3.61861	WITS 17	2		C4	8.40317	0.1178	-2.13877	WITS 17	3
B4	2.68903	0.0302	-3.49991	WITS 17	2		C4	8.57128	0.11996	-2.1206	WITS 17	3
B4	2.85703	0.03378	-3.38789	WITS 17	2		C4	8.73936	0.12422	-2.0857	WITS 17	3
B4	3.02514	0.03726	-3.28983	WITS 17	2		C4	8.90744	0.1272	-2.06199	WITS 17	3
B4	3.19322	0.04042	-3.20843	WITS 17	2		C4	9.07553	0.13068	-2.035	WITS 17	3
B4	3.36122	0.045	-3.10109	WITS 17	2		C4	9.24356	0.13432	-2.00753	WITS 17	3
B4	3.52931	0.0489	-3.01798	WITS 17	2		C4	9.41164	0.13792	-1.98108	WITS 17	3
B4	3.69742	0.0534	-2.92994	WITS 17	2		C4	9.57964	0.14186	-1.95291	WITS 17	3
B4	3.86542	0.05636	-2.876	WITS 17	2		C4	9.74772	0.14586	-1.92511	WITS 17	3
B4	4.0335	0.0614	-2.79035	WITS 17	2		C4	9.91572	0.14824	-1.90892	WITS 17	3
B4	4.20161	0.0655	-2.72571	WITS 17	2		C4	10.0838	0.1523	-1.8819	WITS 17	3
B4	4.36961	0.07048	-2.65243	WITS 17	2		C4	10.2518	0.15696	-1.85176	WITS 17	3
B4	4.53761	0.07634	-2.57256	WITS 17	2		C4	10.4199	0.15932	-1.83684	WITS 17	3
B4	4.70572	0.08084	-2.51528	WITS 17	2		C4	10.5879	0.16196	-1.82041	WITS 17	3
B4	4.87372	0.08684	-2.44369	WITS 17	2		C4	10.756	0.16674	-1.79132	WITS 17	3
B4	5.04181	0.092	-2.38597	WITS 17	2		C4	10.9241	0.16948	-1.77502	WITS 17	3
B4	5.20989	0.09596	-2.34382	WITS 17	2		C4	11.0921	0.17056	-1.76867	WITS 17	3
B4	5.37792	0.10166	-2.28612	WITS 17	2		C4	11.2602	0.17362	-1.75089	WITS 17	3
B4	5.546	0.10674	-2.23736	WITS 17	2		C4	11.4283	0.17872	-1.72193	WITS 17	3
B4	5.714	0.11224	-2.18712	WITS 17	2		C4	11.5964	0.17862	-1.72249	WITS 17	3
B4	5.88203	0.11646	-2.15021	WITS 17	2		C4	11.7644	0.18238	-1.70166	WITS 17	3
B4	6.05011	0.12124	-2.10998	WITS 17	2		C4	11.9328	0.18514	-1.68664	WITS 17	3
B4	6.21819	0.12502	-2.07928	WITS 17	2		C4	12.1009	0.18722	-1.67547	WITS 17	3
B4	6.38622	0.13108	-2.03195	WITS 17	2		C4	12.2689	0.18766	-1.67312	WITS 17	3
B4	6.55431	0.13656	-1.99099	WITS 17	2		C4	12.4369	0.18914	-1.66527	WITS 17	3
B4	6.72239	0.13914	-1.97227	WITS 17	2		C4	12.6049	0.19122	-1.65433	WITS 17	3
B4	6.89042	0.14408	-1.93739	WITS 17	2		C4	12.773	0.1946	-1.63681	WITS 17	3
B4	7.0585	0.14914	-1.90287	WITS 17	2		C4	12.9411	0.19454	-1.63712	WITS 17	3
B4	7.22658	0.15358	-1.87353	WITS 17	2		C4	13.1091	0.19606	-1.62933	WITS 17	3
B4	7.39461	0.15972	-1.83433	WITS 17	2		C4	13.2772	0.19754	-1.62181	WITS 17	3
B4	7.56261	0.16348	-1.81106	WITS 17	2		C4	13.4452	0.2008	-1.60545	WITS 17	3
B4	7.73069	0.16792	-1.78427	WITS 17	2		C4	13.6133	0.20114	-1.60375	WITS 17	3
B4	7.89881	0.17138	-1.76387	WITS 17	2		C4	13.7813	0.20298	-1.59465	WITS 17	3
B4	8.06681	0.1763	-1.73557	WITS 17	2		C4	13.9494	0.2029	-1.59504	WITS 17	3
B4	8.23489	0.17988	-1.71547	WITS 17	2		C4	14.1175	0.20564	-1.58163	WITS 17	3
B4	8.40289	0.18622	-1.68083	WITS 17	2		C4	14.2856	0.20584	-1.58066	WITS 17	3
B4	8.571	0.18906	-1.66569	WITS 17	2		C4	14.4537	0.20708	-1.57465	WITS 17	3
B4	8.73908	0.19508	-1.63435	WITS 17	2		C4	14.6217	0.20964	-1.56236	WITS 17	3
B4	8.90708	0.20054	-1.60674	WITS 17	2		C4	14.7898	0.21148	-1.55362	WITS 17	3
B4	9.07519	0.2031	-1.59406	WITS 17	2		C4	14.9579	0.21304	-1.54628	WITS 17	3
B4	9.24328	0.20582	-1.58075	WITS 17	2		C4	15.126	0.21384	-1.54253	WITS 17	3
B4	9.41139	0.20912	-1.56485	WITS 17	2		C4	15.294	0.21584	-1.53322	WITS 17	3
B4	9.57939	0.21554	-1.53461	WITS 17	2		C4	15.4621	0.2172	-1.52694	WITS 17	3
B4	9.74747	0.21856	-1.52069	WITS 17	2		C4	15.6301	0.21828	-1.52198	WITS 17	3
B4	9.91558	0.22154	-1.50715	WITS 17	2		C4	15.7982	0.21888	-1.51923	WITS 17	3
B4	10.0836	0.22336	-1.49897	WITS 17	2		C4	15.9662	0.22098	-1.50968	WITS 17	3
B4	10.2517	0.22792	-1.47876	WITS 17	2		C4	16.1343	0.22274	-1.50175	WITS 17	3
B4	10.4198	0.23166	-1.46248	WITS 17	2		C4	16.3024	0.22306	-1.50031	WITS 17	3
B4	10.5878	0.23318	-1.45594	WITS 17	2		C4	16.4704	0.22454	-1.4937	WITS 17	3
B4	10.7559	0.2361	-1.4435	WITS 17	2		C4	16.6384	0.22438	-1.49441	WITS 17	3
B4	10.9239	0.23834	-1.43406	WITS 17	2		C4	16.8065	0.22254	-1.50265	WITS 17	3
B4	11.092	0.24108	-1.42263	WITS 17	2		C4	16.9745	0.22176	-1.50616	WITS 17	3
B4	11.2601	0.24444	-1.40879	WITS 17	2		C4	17.1426	0.22014	-1.51349	WITS 17	3
B4	11.4281	0.24546	-1.40462	WITS 17	2		C4	17.3107	0.21994	-1.5144	WITS 17	3
B4	11.5961	0.2487	-1.39151	WITS 17	2		C4	17.4788	0.21884	-1.51941	WITS 17	3
B4	11.7643	0.25162	-1.37984	WITS 17	2		C4	17.6469	0.21814	-1.52262	WITS 17	3
B4	11.9326	0.25356	-1.37215	WITS 17	2		C4	17.8149	0.21382	-1.54262	WITS 17	3
B4	12.1006	0.25668	-1.35993	WITS 17	2		C4	17.983	0.21276	-1.54759	WITS 17	3
B4	12.2687	0.25798	-1.35487	WITS 17	2		C4	18.1511	0.21136	-1.55419	WITS 17	3
B4	12.4367	0.26192	-1.33972	WITS 17	2		C4	18.3191	0.21108	-1.55552	WITS 17	3
B4	12.6047	0.26348	-1.33378	WITS 17	2		C4	18.4872	0.20794	-1.57051	WITS 17	3
B4	12.7729	0.26584	-1.32486	WITS 17	2		C4	18.6553	0.20592	-1.58027	WITS 17	3
B4	12.9409	0.26962	-1.31074	WITS 17	2		C4	18.8233	0.20402	-1.58954	WITS 17	3
B4	13.1089	0.27172	-1.30298	WITS 17	2		C4	18.9914	0.2022	-1.5985	WITS 17	3
B4	13.2771	0.27298	-1.29836	WITS 17	2		C4	19.1594	0.2001	-1.60894	WITS 17	3
B4	13.4451	0.27596	-1.2875	WITS 17	2		C4	19.3275	0.1983	-1.61797	WITS 17	3
B4	13.6131	0.27424	-1.29375	WITS 17	2		C4	19.4955	0.19642	-1.6275	WITS 17	3
B4	13.7812	0.27346	-1.2966	WITS 17	2		C4	19.6636	0.1952	-1.63373	WITS 17	3
B4	13.9492	0.2754	-1.28953	WITS 17	2		C4	19.8316	0.19306	-1.64475	WITS 17	3
B4	14.1173	0.2731	-1.29792	WITS 17	2		C4	19.9997	0.19162	-1.65224	WITS 17	3
B4	14.2853	0.26994	-1.30956	WITS 17	2		C5	1.68064	0.0073	-4.91988	WITS 19	3
B4	14.4534	0.26878	-1.31386	WITS 17	2		C5	1.84864	0.008	-4.82831	WITS 19	3
B4	14.6215	0.26752	-1.31856	WITS 17	2		C5	2.01675	0.00862	-4.75367	WITS 19	3
B4	14.7895	0.26342	-1.33401	WITS 17	2		C5	2.18483	0.00946	-4.66068	WITS 19	3
B4	14.9576	0.26116	-1.34262	WITS 17	2		C5	2.35283	0.01076	-4.53192	WITS 19	3
B4	15.1257	0.25784	-1.35542	WITS 17	2		C5	2.52092	0.01248	-4.38363	WITS 19	3
B4	15.2937	0.25434	-1.36908	WITS 17	2		C5	2.68903	0.01346	-4.30803	WITS 19	3
B4	15.4618	0.25316	-1.37373	WITS 17	2		C5	2.85703	0.01546	-4.1695	WITS 19	3
B4	15.6298	0.24916	-1.38966	WITS 17	2		C5	3.02511	0.01668	-4.09354	WITS 19	3
B4	15.7979	0.2469	-1.39877	WITS 17	2		C5	3.19322	0.01908	-3.95911	WITS 19	3
B4	15.9659	0.24436	-1.40911	WITS 17	2		C5	3.36131	0.02096	-3.86514	WITS 19	3
B4	16.134	0.24128	-1.4218	WITS 17	2		C5	3.52939	0.02322	-3.76274	WITS 19	3
B4	16.3021	0.24144	-1.42113	WITS 17	2		C5	3.6975	0.02504	-3.68728	WITS 19	3
B4	16.4701	0.23908	-1.43096	WITS 17	2		C5	3.8655	0.0279	-3.57913	WITS 19	3
B4	16.6382	0.23924	-1.43029	WITS 17	2		C5	4.03358	0.03022	-3.49925	WITS 19	3
B4	16.8062	0.23376	-1.45346	WITS 17	2		C5	4.20167	0.03208	-3.43952	WITS 19	3
B4	16.9743	0.23296	-1.45689	WITS 17	2		C5	4.36975	0.03484	-3.35699	WITS 19	3
B4	17.1423	0.22918	-1.47325	WITS 17	2		C5	4.53775	0.03762	-3.28022	WITS 19	3
B4	17.3104	0.22802	-1.47832	WITS 17	2		C5	4.70586	0.04038	-3.20942	WITS 19	3
B4	17.4784	0.22698	-1.48289	WITS 17	2		C5	4.87386	0.04268	-3.15402	WITS 19	3
B4	17.6464	0.22466	-1.49317	WITS 17	2		C5	5.04194	0.04568	-3.08609	WITS 19	3
B4	17.8146	0.2214	-1.50778	WITS 17	2		C5	5.21003	0.04876	-3.02084	WITS 19	3
B4	17.9826	0.2221	-1.50463	WITS 17	2		C5	5.37811	0.05122	-2.97163	WITS 19	3
B4	18.1506	0.21836	-1.52161	WITS 17	2		C5	5.54622	0.05418	-2.91544	WITS 19	3
B4	18.3186	0.21546	-1.53498	WITS 17	2		C5	5.71422	0.0577	-2.8525	WITS 19	3
B4	18.4868	0.2166	-1.5297	WITS 17	2		C5	5.88231	0.06026	-2.80909	WITS 19	3
B4	18.6548	0.2131	-1.54599	WITS 17	2		C5	6.05042	0.06326	-2.7605	WITS 19	3
B4	18.8229	0.21208	-1.55079	WITS 17	2		C5	6.21842	0.06634	-2.71296	WITS 19	3
B4	18.9909	0.2104	-1.55874	WITS 17	2		C5	6.3865	0.06932	-2.66902	WITS 19	3
B4	19.159	0.21096	-1.55609	WITS 17	2		C5	6.55461	0.07212	-2.62942	WITS 19	3
B4	19.327	0.20764	-1.57195	WITS 17	2		C5	6.72261	0.07546	-2.58415	WITS 19	3
B4	19.4951	0.2067	-1.57649	WITS 17	2		C5	6.89069	0.07806	-2.55028	WITS 19	3
B4	19.6632	0.20498	-1.58484	WITS 17	2		C5	7.05869	0.0807	-2.51702	WITS 19	3
B4	19.8312	0.20414	-1.58895	WITS 17	2		C5	7.22678	0.08396	-2.47741	WITS 19	3
B4	19.9993	0.20366	-1.5913	WITS 17	2		C5	7.39478	0.08752	-2.43589	WITS 19	3
B5	0	0.00378	-5.57803	WITS 19	2		C5	7.56289	0.09034	-2.40417	WITS 19	3
B5	0.168028	0.00522	-5.25526	WITS 19	2		C5	7.73097	0.0936	-2.36872	WITS 19	3
B5	0.336	0.00472	-5.35595	WITS 19	2		C5	7.89897	0.09642	-2.33904	WITS 19	3
B5	0.504083	0.00478	-5.34332	WITS 19	2		C5	8.06708	0.10006	-2.30199	WITS 19	3
B5	0.672167	0.0058	-5.1499	WITS 19	2		C5	8.23517	0.10172	-2.28553	WITS 19	3
B5	0.84025	0.00642	-5.04834	WITS 19	2		C5	8.40317	0.10532	-2.25075	WITS 19	3
B5	1.00836	0.00766	-4.87174	WITS 19	2		C5	8.57128	0.1082	-2.22377	WITS 19	3
B5	1.17644	0.00938	-4.66918	WITS 19	2		C5	8.73936	0.11146	-2.19409	WITS 19	3
B5	1.34444	0.01022	-4.58341	WITS 19	2		C5	8.90744	0.11428	-2.1691	WITS 19	3
B5	1.51256	0.01216	-4.4096	WITS 19	2		C5	9.07553	0.1166	-2.14901	WITS 19	3
B5	1.68064	0.01422	-4.25311	WITS 19	2		C5	9.24356	0.11944	-2.12494	WITS 19	3
B5	1.84864	0.01582	-4.14648	WITS 19	2		C5	9.41164	0.12292	-2.09622	WITS 19	3
B5	2.01675	0.01804	-4.01516	WITS 19	2		C5	9.57964	0.1256	-2.07465	WITS 19	3
B5	2.18483	0.02046	-3.88928	WITS 19	2		C5	9.74772	0.12892	-2.04856	WITS 19	3
B5	2.35283	0.02316	-3.76533	WITS 19	2		C5	9.91572	0.13106	-2.0321	WITS 19	3
B5	2.52092	0.02598	-3.65043	WITS 19	2		C5	10.0838	0.1334	-2.0144	WITS 19	3
B5	2.68903	0.02926	-3.53153	WITS 19	2		C5	10.2518	0.13674	-1.98967	WITS 19	3
B5	2.85703	0.0325	-3.42652	WITS 19	2		C5	10.4199	0.13908	-1.97271	WITS 19	3
B5	3.02514	0.03566	-3.33373	WITS 19	2		C5	10.5879	0.14156	-1.95503	WITS 19	3
B5	3.19322	0.0389	-3.24676	WITS 19	2		C5	10.756	0.14372	-1.93989	WITS 19	3
B5	3.36122	0.04268	-3.15402	WITS 19	2		C5	10.9241	0.14506	-1.93061	WITS 19	3
B5	3.52931	0.04648	-3.06873	WITS 19	2		C5	11.0921	0.14668	-1.9195	WITS 19	3
B5	3.69742	0.05058	-2.9842	WITS 19	2		C5	11.2602	0.14868	-1.90596	WITS 19	3
B5	3.86542	0.05458	-2.90809	WITS 19	2		C5	11.4283	0.15132	-1.88836	WITS 19	3
B5	4.0335	0.05892	-2.83157	WITS 19	2		C5	11.5964	0.15178	-1.88532	WITS 19	3
B5	4.20161	0.0626	-2.77099	WITS 19	2		C5	11.7644	0.15394	-1.87119	WITS 19	3
B5	4.36961	0.06756	-2.69474	WITS 19	2		C5	11.9328	0.15584	-1.85893	WITS 19	3
B5	4.53761	0.07274	-2.62086	WITS 19	2		C5	12.1009	0.15604	-1.85764	WITS 19	3
B5	4.70572	0.07706	-2.56317	WITS 19	2		C5	12.2689	0.1568	-1.85278	WITS 19	3
B5	4.87372	0.08208	-2.50006	WITS 19	2		C5	12.4369	0.15692	-1.85202	WITS 19	3
B5	5.04181	0.08694	-2.44254	WITS 19	2		C5	12.6049	0.15786	-1.84605	WITS 19	3
B5	5.20989	0.09082	-2.39888	WITS 19	2		C5	12.773	0.15942	-1.83621	WITS 19	3
B5	5.37792	0.09638	-2.33946	WITS 19	2		C5	12.9411	0.15984	-1.83358	WITS 19	3
B5	5.546	0.10056	-2.297	WITS 19	2		C5	13.1091	0.16008	-1.83208	WITS 19	3
B5	5.714	0.10532	-2.25075	WITS 19	2		C5	13.2772	0.16088	-1.8271	WITS 19	3
B5	5.88203	0.11098	-2.19841	WITS 19	2		C5	13.4452	0.16278	-1.81536	WITS 19	3
B5	6.05011	0.11464	-2.16596	WITS 19	2		C5	13.6133	0.1635	-1.81094	WITS 19	3
B5	6.21819	0.1185	-2.13284	WITS 19	2		C5	13.7813	0.164	-1.80789	WITS 19	3
B5	6.38622	0.12482	-2.08088	WITS 19	2		C5	13.9494	0.164	-1.80789	WITS 19	3
B5	6.55431	0.12842	-2.05245	WITS 19	2		C5	14.1175	0.16516	-1.80084	WITS 19	3
B5	6.72239	0.13142	-2.02936	WITS 19	2		C5	14.2856	0.16548	-1.7989	WITS 19	3
B5	6.89042	0.13736	-1.98515	WITS 19	2		C5	14.4537	0.16648	-1.79288	WITS 19	3
B5	7.0585	0.14018	-1.96483	WITS 19	2		C5	14.6217	0.16662	-1.79204	WITS 19	3
B5	7.22658	0.1448	-1.9324	WITS 19	2		C5	14.7898	0.16798	-1.78391	WITS 19	3
B5	7.39461	0.1494	-1.90113	WITS 19	2		C5	14.9579	0.16888	-1.77857	WITS 19	3
B5	7.56261	0.15446	-1.86782	WITS 19	2		C5	15.126	0.16868	-1.77975	WITS 19	3
B5	7.73069	0.15846	-1.84225	WITS 19	2		C5	15.294	0.16968	-1.77384	WITS 19	3
B5	7.89881	0.16346	-1.81119	WITS 19	2		C5	15.4621	0.1708	-1.76726	WITS 19	3
B5	8.06681	0.1662	-1.79456	WITS 19	2		C5	15.6301	0.1702	-1.77078	WITS 19	3
B5	8.23489	0.1712	-1.76492	WITS 19	2		C5	15.7982	0.17172	-1.76189	WITS 19	3
B5	8.40289	0.17644	-1.73477	WITS 19	2		C5	15.9662	0.17146	-1.76341	WITS 19	3
B5	8.571	0.17834	-1.72406	WITS 19	2		C5	16.1343	0.17344	-1.75192	WITS 19	3
B5	8.73908	0.18454	-1.68989	WITS 19	2		C5	16.3024	0.17352	-1.75146	WITS 19	3
B5	8.90708	0.1874	-1.67451	WITS 19	2		C5	16.4704	0.17354	-1.75135	WITS 19	3
B5	9.07519	0.1913	-1.65391	WITS 19	2		C5	16.6384	0.1737	-1.75043	WITS 19	3
B5	9.24328	0.1946	-1.63681	WITS 19	2		C5	16.8065	0.17314	-1.75365	WITS 19	3
B5	9.41139	0.1991	-1.61395	WITS 19	2		C5	16.9745	0.17302	-1.75435	WITS 19	3
B5	9.57939	0.20282	-1.59544	WITS 19	2		C5	17.1426	0.17222	-1.75898	WITS 19	3
B5	9.74747	0.20616	-1.5791	WITS 19	2		C5	17.3107	0.17234	-1.75829	WITS 19	3
B5	9.91558	0.20788	-1.57079	WITS 19	2		C5	17.4788	0.17116	-1.76516	WITS 19	3
B5	10.0836	0.21156	-1.55325	WITS 19	2		C5	17.6469	0.1705	-1.76902	WITS 19	3
B5	10.2517	0.2136	-1.54365	WITS 19	2		C5	17.8149	0.1688	-1.77904	WITS 19	3
B5	10.4198	0.2183	-1.52188	WITS 19	2		C5	17.983	0.16768	-1.7857	WITS 19	3
B5	10.5878	0.22002	-1.51404	WITS 19	2		C5	18.1511	0.16642	-1.79324	WITS 19	3
B5	10.7559	0.22278	-1.50157	WITS 19	2		C5	18.3191	0.16594	-1.79613	WITS 19	3
B5	10.9239	0.22534	-1.49014	WITS 19	2		C5	18.4872	0.16384	-1.80886	WITS 19	3
B5	11.092	0.2264	-1.48545	WITS 19	2		C5	18.6553	0.16242	-1.81757	WITS 19	3
B5	11.2601	0.2303	-1.46837	WITS 19	2		C5	18.8233	0.16152	-1.82313	WITS 19	3
B5	11.4281	0.23384	-1.45312	WITS 19	2		C5	18.9914	0.1603	-1.83071	WITS 19	3
B5	11.5961	0.2363	-1.44265	WITS 19	2		C5	19.1594	0.1579	-1.84579	WITS 19	3
B5	11.7643	0.2388	-1.43213	WITS 19	2		C5	19.3275	0.157	-1.85151	WITS 19	3
B5	11.9326	0.24178	-1.41973	WITS 19	2		C5	19.4955	0.15532	-1.86227	WITS 19	3
B5	12.1006	0.24292	-1.41502	WITS 19	2		C5	19.6636	0.15504	-1.86407	WITS 19	3
B5	12.2687	0.24588	-1.40291	WITS 19	2		C5	19.8316	0.15278	-1.87876	WITS 19	3
B5	12.4367	0.24682	-1.3991	WITS 19	2		C5	19.9997	0.15142	-1.8877	WITS 19	3
B5	12.6047	0.24788	-1.39481	WITS 19	2		C6	2.35283	0.0069	-4.97623	WITS 21	3
B5	12.7729	0.2516	-1.37991	WITS 19	2		C6	2.52092	0.0079	-4.84089	WITS 21	3
B5	12.9409	0.25474	-1.36751	WITS 19	2		C6	2.68903	0.0086	-4.75599	WITS 21	3
B5	13.1089	0.2578	-1.35557	WITS 19	2		C6	2.85703	0.00985	-4.62028	WITS 21	3
B5	13.2771	0.25818	-1.3541	WITS 19	2		C6	3.02511	0.010575	-4.54926	WITS 21	3
B5	13.4451	0.2602	-1.3463	WITS 19	2		C6	3.19322	0.012	-4.42285	WITS 21	3
B5	13.6131	0.26234	-1.33811	WITS 19	2		C6	3.36131	0.01345	-4.30878	WITS 21	3
B5	13.7812	0.26258	-1.3372	WITS 19	2		C6	3.52939	0.014975	-4.20137	WITS 21	3
B5	13.9492	0.26164	-1.34079	WITS 19	2		C6	3.6975	0.0166	-4.09835	WITS 21	3
B5	14.1173	0.2613	-1.34209	WITS 19	2		C6	3.8655	0.019	-3.96332	WITS 21	3
B5	14.2853	0.2591	-1.35054	WITS 19	2		C6	4.03358	0.021425	-3.8432	WITS 21	3
B5	14.4534	0.25784	-1.35542	WITS 19	2		C6	4.20167	0.02355	-3.74863	WITS 21	3
B5	14.6215	0.25472	-1.36759	WITS 19	2		C6	4.36975	0.026225	-3.64104	WITS 21	3
B5	14.7895	0.25276	-1.37531	WITS 19	2		C6	4.53775	0.028875	-3.54478	WITS 21	3
B5	14.9576	0.25006	-1.38605	WITS 19	2		C6	4.70586	0.031225	-3.46654	WITS 21	3
B5	15.1257	0.24718	-1.39764	WITS 19	2		C6	4.87386	0.034025	-3.38066	WITS 21	3
B5	15.2937	0.24534	-1.40511	WITS 19	2		C6	5.04194	0.03695	-3.29819	WITS 21	3
B5	15.4618	0.2425	-1.41675	WITS 19	2		C6	5.21003	0.039725	-3.22577	WITS 21	3
B5	15.6298	0.2396	-1.42878	WITS 19	2		C6	5.37811	0.04275	-3.15239	WITS 21	3
B5	15.7979	0.23806	-1.43523	WITS 19	2		C6	5.54622	0.045575	-3.0884	WITS 21	3
B5	15.9659	0.23602	-1.44384	WITS 19	2		C6	5.71422	0.04905	-3.01492	WITS 21	3
B5	16.134	0.23212	-1.4605	WITS 19	2		C6	5.88231	0.0524	-2.94885	WITS 21	3
B5	16.3021	0.23162	-1.46266	WITS 19	2		C6	6.05042	0.05575	-2.88688	WITS 21	3
B5	16.4701	0.22764	-1.47999	WITS 19	2		C6	6.21842	0.059825	-2.81633	WITS 21	3
B5	16.6382	0.22626	-1.48607	WITS 19	2		C6	6.3865	0.0636	-2.75514	WITS 21	3
B5	16.8062	0.22488	-1.49219	WITS 19	2		C6	6.55461	0.066275	-2.71394	WITS 21	3
B5	16.9743	0.22162	-1.50679	WITS 19	2		C6	6.72261	0.070825	-2.64754	WITS 21	3
B5	17.1423	0.21882	-1.51951	WITS 19	2		C6	6.89069	0.074	-2.60369	WITS 21	3
B5	17.3104	0.2179	-1.52372	WITS 19	2		C6	7.05869	0.0767	-2.56785	WITS 21	3
B5	17.4784	0.2168	-1.52878	WITS 19	2		C6	7.22678	0.0804	-2.52074	WITS 21	3
B5	17.6464	0.21404	-1.54159	WITS 19	2		C6	7.39478	0.083425	-2.48381	WITS 21	3
B5	17.8146	0.21144	-1.55381	WITS 19	2		C6	7.56289	0.08665	-2.44588	WITS 21	3
B5	17.9826	0.21146	-1.55372	WITS 19	2		C6	7.73097	0.090425	-2.40323	WITS 21	3
B5	18.1506	0.2086	-1.56734	WITS 19	2		C6	7.89897	0.09405	-2.36393	WITS 21	3
B5	18.3186	0.20758	-1.57224	WITS 19	2		C6	8.06708	0.098125	-2.32151	WITS 21	3
B5	18.4868	0.20564	-1.58163	WITS 19	2		C6	8.23517	0.1004	-2.29859	WITS 21	3
B5	18.6548	0.20384	-1.59042	WITS 19	2		C6	8.40317	0.103175	-2.27133	WITS 21	3
B5	18.8229	0.20168	-1.60107	WITS 19	2		C6	8.57128	0.1069	-2.23586	WITS 21	3
B5	18.9909	0.2003	-1.60794	WITS 19	2		C6	8.73936	0.110675	-2.20116	WITS 21	3
B5	19.159	0.19982	-1.61034	WITS 19	2		C6	8.90744	0.11355	-2.17551	WITS 21	3
B5	19.327	0.1979	-1.61999	WITS 19	2		C6	9.07553	0.116875	-2.14665	WITS 21	3
B5	19.4951	0.19662	-1.62648	WITS 19	2		C6	9.24356	0.1194	-2.12528	WITS 21	3
B5	19.6632	0.19424	-1.63866	WITS 19	2		C6	9.41164	0.1231	-2.09476	WITS 21	3
B5	19.8312	0.1935	-1.64248	WITS 19	2		C6	9.57964	0.125575	-2.07485	WITS 21	3
B5	19.9993	0.19338	-1.6431	WITS 19	2		C6	9.74772	0.129925	-2.0408	WITS 21	3
B6	0	0.0038	-5.57275	WITS 21	2		C6	9.91572	0.132125	-2.02401	WITS 21	3
B6	0.168028	0.006025	-5.11184	WITS 21	2		C6	10.0838	0.13475	-2.00433	WITS 21	3
B6	0.336	0.004725	-5.35489	WITS 21	2		C6	10.2518	0.138825	-1.97454	WITS 21	3
B6	0.504083	0.005525	-5.19847	WITS 21	2		C6	10.4199	0.1408	-1.96041	WITS 21	3
B6	0.672167	0.006525	-5.03211	WITS 21	2		C6	10.5879	0.144225	-1.93638	WITS 21	3
B6	0.84025	0.008	-4.82831	WITS 21	2		C6	10.756	0.1462	-1.92278	WITS 21	3
B6	1.00836	0.00975	-4.63049	WITS 21	2		C6	10.9241	0.148675	-1.90599	WITS 21	3
B6	1.17644	0.011225	-4.48961	WITS 21	2		C6	11.0921	0.150375	-1.89462	WITS 21	3
B6	1.34444	0.013375	-4.31437	WITS 21	2		C6	11.2602	0.1533	-1.87536	WITS 21	3
B6	1.51256	0.0156	-4.16048	WITS 21	2		C6	11.4283	0.15595	-1.85822	WITS 21	3
B6	1.68064	0.0182	-4.00633	WITS 21	2		C6	11.5964	0.157025	-1.85135	WITS 21	3
B6	1.84864	0.02075	-3.87521	WITS 21	2		C6	11.7644	0.1594	-1.83634	WITS 21	3
B6	2.01675	0.0241	-3.72554	WITS 21	2		C6	11.9328	0.161825	-1.82124	WITS 21	3
B6	2.18483	0.02655	-3.62873	WITS 21	2		C6	12.1009	0.161975	-1.82031	WITS 21	3
B6	2.35283	0.029925	-3.50906	WITS 21	2		C6	12.2689	0.1643	-1.80606	WITS 21	3
B6	2.52092	0.03335	-3.4007	WITS 21	2		C6	12.4369	0.16405	-1.80758	WITS 21	3
B6	2.68903	0.03705	-3.29549	WITS 21	2		C6	12.6049	0.165625	-1.79803	WITS 21	3
B6	2.85703	0.040975	-3.19479	WITS 21	2		C6	12.773	0.167675	-1.78573	WITS 21	3
B6	3.02514	0.0447	-3.10778	WITS 21	2		C6	12.9411	0.1698	-1.77313	WITS 21	3
B6	3.19322	0.048175	-3.03292	WITS 21	2		C6	13.1091	0.169675	-1.77387	WITS 21	3
B6	3.36122	0.051975	-2.95699	WITS 21	2		C6	13.2772	0.17175	-1.76172	WITS 21	3
B6	3.52931	0.0563	-2.87706	WITS 21	2		C6	13.4452	0.173725	-1.75028	WITS 21	3
B6	3.69742	0.0612	-2.79361	WITS 21	2		C6	13.6133	0.176125	-1.73656	WITS 21	3
B6	3.86542	0.0654	-2.72723	WITS 21	2		C6	13.7813	0.177275	-1.73005	WITS 21	3
B6	4.0335	0.069825	-2.66176	WITS 21	2		C6	13.9494	0.1768	-1.73274	WITS 21	3
B6	4.20161	0.074925	-2.59127	WITS 21	2		C6	14.1175	0.179475	-1.71772	WITS 21	3
B6	4.36961	0.07975	-2.52886	WITS 21	2		C6	14.2856	0.17925	-1.71897	WITS 21	3
B6	4.53761	0.084825	-2.46716	WITS 21	2		C6	14.4537	0.181975	-1.70389	WITS 21	3
B6	4.70572	0.0892	-2.41687	WITS 21	2		C6	14.6217	0.182125	-1.70306	WITS 21	3
B6	4.87372	0.094025	-2.36419	WITS 21	2		C6	14.7898	0.185575	-1.6843	WITS 21	3
B6	5.04181	0.098475	-2.31795	WITS 21	2		C6	14.9579	0.1866	-1.67879	WITS 21	3
B6	5.20989	0.10275	-2.27546	WITS 21	2		C6	15.126	0.18575	-1.68335	WITS 21	3
B6	5.37792	0.1075	-2.23026	WITS 21	2		C6	15.294	0.18845	-1.66892	WITS 21	3
B6	5.546	0.112125	-2.18814	WITS 21	2		C6	15.4621	0.189825	-1.66165	WITS 21	3
B6	5.714	0.116625	-2.14879	WITS 21	2		C6	15.6301	0.188225	-1.67012	WITS 21	3
B6	5.88203	0.120975	-2.11217	WITS 21	2		C6	15.7982	0.1911	-1.65496	WITS 21	3
B6	6.05011	0.12555	-2.07505	WITS 21	2		C6	15.9662	0.19	-1.66073	WITS 21	3
B6	6.21819	0.129375	-2.04504	WITS 21	2		C6	16.1343	0.191675	-1.65195	WITS 21	3
B6	6.38622	0.133775	-2.0116	WITS 21	2		C6	16.3024	0.19065	-1.65732	WITS 21	3
B6	6.55431	0.13785	-1.98159	WITS 21	2		C6	16.4704	0.188575	-1.66826	WITS 21	3
B6	6.72239	0.142025	-1.95175	WITS 21	2		C6	16.6384	0.18765	-1.67318	WITS 21	3
B6	6.89042	0.145925	-1.92466	WITS 21	2		C6	16.8065	0.186325	-1.68026	WITS 21	3
B6	7.0585	0.150175	-1.89595	WITS 21	2		C6	16.9745	0.18375	-1.69418	WITS 21	3
B6	7.22658	0.1541	-1.87015	WITS 21	2		C6	17.1426	0.182275	-1.70224	WITS 21	3
B6	7.39461	0.158575	-1.84153	WITS 21	2		C6	17.3107	0.1811	-1.70871	WITS 21	3
B6	7.56261	0.161825	-1.82124	WITS 21	2		C6	17.4788	0.178375	-1.72387	WITS 21	3
B6	7.73069	0.166575	-1.79231	WITS 21	2		C6	17.6469	0.17565	-1.73926	WITS 21	3
B6	7.89881	0.170425	-1.76946	WITS 21	2		C6	17.8149	0.17515	-1.74211	WITS 21	3
B6	8.06681	0.17445	-1.74612	WITS 21	2		C6	17.983	0.173675	-1.75057	WITS 21	3
B6	8.23489	0.17795	-1.72625	WITS 21	2		C6	18.1511	0.17245	-1.75765	WITS 21	3
B6	8.40289	0.181725	-1.70526	WITS 21	2		C6	18.3191	0.171775	-1.76157	WITS 21	3
B6	8.571	0.1856	-1.68416	WITS 21	2		C6	18.4872	0.1692	-1.77667	WITS 21	3
B6	8.73908	0.188525	-1.66852	WITS 21	2		C6	18.6553	0.1673	-1.78797	WITS 21	3
B6	8.90708	0.192025	-1.65013	WITS 21	2		C6	18.8233	0.164875	-1.80257	WITS 21	3
B6	9.07519	0.195425	-1.63258	WITS 21	2		C6	18.9914	0.16355	-1.81064	WITS 21	3
B6	9.24328	0.1984	-1.61747	WITS 21	2		C6	19.1594	0.1625	-1.81708	WITS 21	3
B6	9.41139	0.200875	-1.60507	WITS 21	2		C6	19.3275	0.1618	-1.82139	WITS 21	3
B6	9.57939	0.20385	-1.59037	WITS 21	2		C6	19.4955	0.159625	-1.83493	WITS 21	3
B6	9.74747	0.206825	-1.57588	WITS 21	2		C6	19.6636	0.1592	-1.83759	WITS 21	3
B6	9.91558	0.209025	-1.5653	WITS 21	2		C6	19.8316	0.157275	-1.84976	WITS 21	3
B6	10.0836	0.211975	-1.55129	WITS 21	2		C6	19.9997	0.155225	-1.86288	WITS 21	3
B6	10.2517	0.21435	-1.54015	WITS 21	2		D1	0.672278	0.0076	-4.87961	WITS 01	4
B6	10.4198	0.2171	-1.5274	WITS 21	2		D1	0.840361	0.00842	-4.77715	WITS 01	4
B6	10.5878	0.219025	-1.51857	WITS 21	2		D1	1.00836	0.00842	-4.77715	WITS 01	4
B6	10.7559	0.221625	-1.50677	WITS 21	2		D1	1.17644	0.00972	-4.63357	WITS 01	4
B6	10.9239	0.2241	-1.49566	WITS 21	2		D1	1.34444	0.01044	-4.56211	WITS 01	4
B6	11.092	0.225575	-1.4891	WITS 21	2		D1	1.51256	0.011	-4.50986	WITS 01	4
B6	11.2601	0.229825	-1.47044	WITS 21	2		D1	1.68064	0.01154	-4.46194	WITS 01	4
B6	11.4281	0.23145	-1.46339	WITS 21	2		D1	1.84864	0.01252	-4.38043	WITS 01	4
B6	11.5961	0.2336	-1.45415	WITS 21	2		D1	2.01675	0.01382	-4.28164	WITS 01	4
B6	11.7643	0.236025	-1.44382	WITS 21	2		D1	2.18483	0.0146	-4.22673	WITS 01	4
B6	11.9326	0.23835	-1.43402	WITS 21	2		D1	2.35283	0.0157	-4.15409	WITS 01	4
B6	12.1006	0.240325	-1.42576	WITS 21	2		D1	2.52092	0.01742	-4.05014	WITS 01	4
B6	12.2687	0.2432	-1.41387	WITS 21	2		D1	2.68903	0.01878	-3.97496	WITS 01	4
B6	12.4367	0.244375	-1.40905	WITS 21	2		D1	2.85703	0.02032	-3.89615	WITS 01	4
B6	12.6047	0.245925	-1.40273	WITS 21	2		D1	3.02511	0.0216	-3.83506	WITS 01	4
B6	12.7729	0.247525	-1.39624	WITS 21	2		D1	3.19322	0.02286	-3.77837	WITS 01	4
B6	12.9409	0.2495	-1.3883	WITS 21	2		D1	3.36131	0.02454	-3.70745	WITS 01	4
B6	13.1089	0.250525	-1.3842	WITS 21	2		D1	3.52939	0.02588	-3.65428	WITS 01	4
B6	13.2771	0.2502	-1.38549	WITS 21	2		D1	3.6975	0.02756	-3.59139	WITS 01	4
B6	13.4451	0.249125	-1.3898	WITS 21	2		D1	3.8655	0.02936	-3.52812	WITS 01	4
B6	13.6131	0.24835	-1.39292	WITS 21	2		D1	4.03358	0.03126	-3.46542	WITS 01	4
B6	13.7812	0.2462	-1.40161	WITS 21	2		D1	4.20167	0.03318	-3.40581	WITS 01	4
B6	13.9492	0.24345	-1.41284	WITS 21	2		D1	4.36975	0.03494	-3.35412	WITS 01	4
B6	14.1173	0.2415	-1.42089	WITS 21	2		D1	4.53775	0.03698	-3.29738	WITS 01	4
B6	14.2853	0.2399	-1.42753	WITS 21	2		D1	4.70586	0.03926	-3.23755	WITS 01	4
B6	14.4534	0.237425	-1.4379	WITS 21	2		D1	4.87386	0.04136	-3.18544	WITS 01	4
B6	14.6215	0.234825	-1.44891	WITS 21	2		D1	5.04194	0.0435	-3.13499	WITS 01	4
B6	14.7895	0.232275	-1.45983	WITS 21	2		D1	5.21003	0.0461	-3.07694	WITS 01	4
B6	14.9576	0.23075	-1.46642	WITS 21	2		D1	5.37811	0.04808	-3.03489	WITS 01	4
B6	15.1257	0.22825	-1.47731	WITS 21	2		D1	5.54622	0.04984	-2.99894	WITS 01	4
B6	15.2937	0.225975	-1.48733	WITS 21	2		D1	5.71422	0.05246	-2.9477	WITS 01	4
B6	15.4618	0.224025	-1.496	WITS 21	2		D1	5.88231	0.05542	-2.89281	WITS 01	4
B6	15.6298	0.22175	-1.5062	WITS 21	2		D1	6.05042	0.05698	-2.86505	WITS 01	4
B6	15.7979	0.21965	-1.51572	WITS 21	2		D1	6.21842	0.05976	-2.81742	WITS 01	4
B6	15.9659	0.2179	-1.52372	WITS 21	2		D1	6.3865	0.06254	-2.77195	WITS 01	4
B6	16.134	0.2154	-1.53526	WITS 21	2		D1	6.55461	0.06438	-2.74295	WITS 01	4
B6	16.3021	0.214075	-1.54143	WITS 21	2		D1	6.72261	0.0671	-2.70157	WITS 01	4
B6	16.4701	0.21145	-1.55377	WITS 21	2		D1	6.89069	0.0685	-2.68092	WITS 01	4
B6	16.6382	0.2101	-1.56017	WITS 21	2		D1	7.05869	0.07124	-2.6417	WITS 01	4
B6	16.8062	0.2081	-1.56974	WITS 21	2		D1	7.22678	0.07372	-2.60748	WITS 01	4
B6	16.9743	0.206175	-1.57903	WITS 21	2		D1	7.39478	0.07616	-2.57492	WITS 01	4
B6	17.1423	0.204125	-1.58902	WITS 21	2		D1	7.56289	0.07772	-2.55464	WITS 01	4
B6	17.3104	0.202275	-1.59813	WITS 21	2		D1	7.73097	0.08092	-2.51429	WITS 01	4
B6	17.4784	0.20095	-1.6047	WITS 21	2		D1	7.89897	0.08344	-2.48363	WITS 01	4
B6	17.6464	0.1998	-1.61044	WITS 21	2		D1	8.06708	0.0862	-2.45109	WITS 01	4
B6	17.8146	0.197975	-1.61961	WITS 21	2		D1	8.23517	0.08818	-2.42838	WITS 01	4
B6	17.9826	0.19585	-1.63041	WITS 21	2		D1	8.40317	0.09024	-2.40528	WITS 01	4
B6	18.1506	0.194625	-1.63668	WITS 21	2		D1	8.57128	0.09268	-2.3786	WITS 01	4
B6	18.3186	0.193275	-1.64364	WITS 21	2		D1	8.73936	0.09512	-2.35262	WITS 01	4
B6	18.4868	0.1922	-1.64922	WITS 21	2		D1	8.90744	0.09754	-2.32749	WITS 01	4
B6	18.6548	0.190575	-1.65771	WITS 21	2		D1	9.07553	0.10006	-2.30199	WITS 01	4
B6	18.8229	0.18915	-1.66521	WITS 21	2		D1	9.24356	0.10182	-2.28455	WITS 01	4
B6	18.9909	0.18775	-1.67264	WITS 21	2		D1	9.41164	0.10454	-2.25819	WITS 01	4
B6	19.159	0.1867	-1.67825	WITS 21	2		D1	9.57964	0.1063	-2.24149	WITS 01	4
B6	19.327	0.185175	-1.68645	WITS 21	2		D1	9.74772	0.10854	-2.22064	WITS 01	4
B6	19.4951	0.183775	-1.69404	WITS 21	2		D1	9.91572	0.11092	-2.19895	WITS 01	4
B6	19.6632	0.182275	-1.70224	WITS 21	2		D1	10.0838	0.11368	-2.17437	WITS 01	4
B6	19.8312	0.181775	-1.70499	WITS 21	2		D1	10.2518	0.11586	-2.15537	WITS 01	4
B6	19.9993	0.1797	-1.71647	WITS 21	2		D1	10.4199	0.118	-2.13707	WITS 01	4
C1	0	0.00374	-5.58867	WITS 01	3		D1	10.5879	0.11872	-2.13099	WITS 01	4
C1	0.168028	0.0048	-5.33914	WITS 01	3		D1	10.756	0.12134	-2.10916	WITS 01	4
C1	0.336	0.00468	-5.36446	WITS 01	3		D1	10.9241	0.12364	-2.09038	WITS 01	4
C1	0.504083	0.00512	-5.2746	WITS 01	3		D1	11.0921	0.12544	-2.07593	WITS 01	4
C1	0.672167	0.00576	-5.15682	WITS 01	3		D1	11.2602	0.1262	-2.06989	WITS 01	4
C1	0.84025	0.00652	-5.03288	WITS 01	3		D1	11.4283	0.12826	-2.0537	WITS 01	4
C1	1.00836	0.0072	-4.93367	WITS 01	3		D1	11.5964	0.12896	-2.04825	WITS 01	4
C1	1.17644	0.00852	-4.76534	WITS 01	3		D1	11.7644	0.13096	-2.03286	WITS 01	4
C1	1.34444	0.00952	-4.65436	WITS 01	3		D1	11.9328	0.13194	-2.02541	WITS 01	4
C1	1.51256	0.01134	-4.47942	WITS 01	3		D1	12.1009	0.1336	-2.0129	WITS 01	4
C1	1.68064	0.01244	-4.38684	WITS 01	3		D1	12.2689	0.13326	-2.01545	WITS 01	4
C1	1.84864	0.0145	-4.23361	WITS 01	3		D1	12.4369	0.13478	-2.00411	WITS 01	4
C1	2.01675	0.01626	-4.11905	WITS 01	3		D1	12.6049	0.13578	-1.99672	WITS 01	4
C1	2.18483	0.01796	-4.01961	WITS 01	3		D1	12.773	0.13586	-1.99613	WITS 01	4
C1	2.35283	0.02024	-3.90009	WITS 01	3		D1	12.9411	0.13658	-1.99084	WITS 01	4
C1	2.52092	0.0224	-3.79869	WITS 01	3		D1	13.1091	0.13788	-1.98137	WITS 01	4
C1	2.68903	0.02492	-3.69208	WITS 01	3		D1	13.2772	0.13858	-1.97631	WITS 01	4
C1	2.85703	0.02758	-3.59066	WITS 01	3		D1	13.4452	0.13944	-1.97012	WITS 01	4
C1	3.02514	0.03012	-3.50257	WITS 01	3		D1	13.6133	0.13932	-1.97098	WITS 01	4
C1	3.19322	0.03284	-3.41611	WITS 01	3		D1	13.7813	0.13996	-1.9664	WITS 01	4
C1	3.36122	0.036	-3.32424	WITS 01	3		D1	13.9494	0.14094	-1.95942	WITS 01	4
C1	3.52931	0.03898	-3.24471	WITS 01	3		D1	14.1175	0.14126	-1.95715	WITS 01	4
C1	3.69742	0.04236	-3.16155	WITS 01	3		D1	14.2856	0.1423	-1.94982	WITS 01	4
C1	3.86542	0.0458	-3.08347	WITS 01	3		D1	14.4537	0.14228	-1.94996	WITS 01	4
C1	4.0335	0.0487	-3.02208	WITS 01	3		D1	14.6217	0.143	-1.94491	WITS 01	4
C1	4.20161	0.0526	-2.94504	WITS 01	3		D1	14.7898	0.14388	-1.93878	WITS 01	4
C1	4.36961	0.05638	-2.87564	WITS 01	3		D1	14.9579	0.14434	-1.93558	WITS 01	4
C1	4.53761	0.06054	-2.80445	WITS 01	3		D1	15.126	0.14424	-1.93628	WITS 01	4
C1	4.70572	0.06442	-2.74233	WITS 01	3		D1	15.294	0.1446	-1.93378	WITS 01	4
C1	4.87372	0.06802	-2.68795	WITS 01	3		D1	15.4621	0.14564	-1.92662	WITS 01	4
C1	5.04181	0.07188	-2.63276	WITS 01	3		D1	15.6301	0.14562	-1.92675	WITS 01	4
C1	5.20989	0.07574	-2.58045	WITS 01	3		D1	15.7982	0.14646	-1.921	WITS 01	4
C1	5.37792	0.08	-2.52573	WITS 01	3		D1	15.9662	0.14736	-1.91488	WITS 01	4
C1	5.546	0.08432	-2.47314	WITS 01	3		D1	16.1343	0.14778	-1.91203	WITS 01	4
C1	5.714	0.08794	-2.4311	WITS 01	3		D1	16.3024	0.14812	-1.90973	WITS 01	4
C1	5.88203	0.09226	-2.38314	WITS 01	3		D1	16.4704	0.14844	-1.90757	WITS 01	4
C1	6.05011	0.09582	-2.34528	WITS 01	3		D1	16.6384	0.14894	-1.90421	WITS 01	4
C1	6.21819	0.09952	-2.3074	WITS 01	3		D1	16.8065	0.14928	-1.90193	WITS 01	4
C1	6.38622	0.10374	-2.26587	WITS 01	3		D1	16.9745	0.14938	-1.90126	WITS 01	4
C1	6.55431	0.1067	-2.23773	WITS 01	3		D1	17.1426	0.1496	-1.89979	WITS 01	4
C1	6.72239	0.11092	-2.19895	WITS 01	3		D1	17.3107	0.15148	-1.8873	WITS 01	4
C1	6.89042	0.11424	-2.16945	WITS 01	3		D1	17.4788	0.15192	-1.8844	WITS 01	4
C1	7.0585	0.11818	-2.13555	WITS 01	3		D1	17.6469	0.15208	-1.88335	WITS 01	4
C1	7.22658	0.12182	-2.10521	WITS 01	3		D1	17.8149	0.15208	-1.88335	WITS 01	4
C1	7.39461	0.12582	-2.0729	WITS 01	3		D1	17.983	0.15234	-1.88164	WITS 01	4
C1	7.56261	0.12918	-2.04655	WITS 01	3		D1	18.1511	0.15278	-1.87876	WITS 01	4
C1	7.73069	0.13272	-2.01951	WITS 01	3		D1	18.3191	0.15452	-1.86743	WITS 01	4
C1	7.89881	0.13704	-1.98748	WITS 01	3		D1	18.4872	0.15338	-1.87484	WITS 01	4
C1	8.06681	0.14064	-1.96155	WITS 01	3		D1	18.6553	0.15346	-1.87432	WITS 01	4
C1	8.23489	0.14354	-1.94114	WITS 01	3		D1	18.8233	0.15218	-1.88269	WITS 01	4
C1	8.40289	0.14818	-1.90933	WITS 01	3		D1	18.9914	0.15204	-1.88361	WITS 01	4
C1	8.571	0.1516	-1.88651	WITS 01	3		D1	19.1594	0.152	-1.88387	WITS 01	4
C1	8.73908	0.15538	-1.86188	WITS 01	3		D1	19.3275	0.15172	-1.88572	WITS 01	4
C1	8.90708	0.15848	-1.84213	WITS 01	3		D1	19.4955	0.1499	-1.89779	WITS 01	4
C1	9.07519	0.162	-1.82016	WITS 01	3		D1	19.6636	0.14974	-1.89885	WITS 01	4
C1	9.24328	0.16544	-1.79915	WITS 01	3		D1	19.8316	0.14658	-1.92018	WITS 01	4
C1	9.41139	0.16918	-1.77679	WITS 01	3		D1	19.9997	0.14652	-1.92059	WITS 01	4
C1	9.57939	0.17236	-1.75817	WITS 01	3		D2	0.840361	0.00741667	-4.90403	WITS 02	4
C1	9.74747	0.17588	-1.73795	WITS 01	3		D2	1.00836	0.00786667	-4.84512	WITS 02	4
C1	9.91558	0.17898	-1.72048	WITS 01	3		D2	1.17644	0.00905	-4.70499	WITS 02	4
C1	10.0836	0.18178	-1.70496	WITS 01	3		D2	1.34444	0.00956667	-4.64947	WITS 02	4
C1	10.2517	0.1852	-1.68632	WITS 01	3		D2	1.51256	0.00998333	-4.60684	WITS 02	4
C1	10.4198	0.18764	-1.67323	WITS 01	3		D2	1.68064	0.0106	-4.5469	WITS 02	4
C1	10.5878	0.19004	-1.66052	WITS 01	3		D2	1.84864	0.0118	-4.43966	WITS 02	4
C1	10.7559	0.19192	-1.65068	WITS 01	3		D2	2.01675	0.01285	-4.35441	WITS 02	4
C1	10.9239	0.19514	-1.63404	WITS 01	3		D2	2.18483	0.0136167	-4.29646	WITS 02	4
C1	11.092	0.1973	-1.62303	WITS 01	3		D2	2.35283	0.0149167	-4.20528	WITS 02	4
C1	11.2601	0.2002	-1.60844	WITS 01	3		D2	2.52092	0.0167333	-4.09035	WITS 02	4
C1	11.4281	0.20232	-1.5979	WITS 01	3		D2	2.68903	0.0179333	-4.02109	WITS 02	4
C1	11.5961	0.20446	-1.58738	WITS 01	3		D2	2.85703	0.0193833	-3.94334	WITS 02	4
C1	11.7643	0.20736	-1.5733	WITS 01	3		D2	3.02511	0.0205333	-3.88571	WITS 02	4
C1	11.9326	0.20874	-1.56667	WITS 01	3		D2	3.19322	0.0222667	-3.80466	WITS 02	4
C1	12.1006	0.21132	-1.55438	WITS 01	3		D2	3.36131	0.0237833	-3.73877	WITS 02	4
C1	12.2687	0.21378	-1.54281	WITS 01	3		D2	3.52939	0.0255833	-3.66581	WITS 02	4
C1	12.4367	0.21616	-1.53174	WITS 01	3		D2	3.6975	0.0271	-3.60822	WITS 02	4
C1	12.6047	0.21822	-1.52225	WITS 01	3		D2	3.8655	0.0291333	-3.53587	WITS 02	4
C1	12.7729	0.22072	-1.51086	WITS 01	3		D2	4.03358	0.0311667	-3.46841	WITS 02	4
C1	12.9409	0.22286	-1.50121	WITS 01	3		D2	4.20167	0.0329333	-3.41327	WITS 02	4
C1	13.1089	0.22518	-1.49086	WITS 01	3		D2	4.36975	0.0345667	-3.36487	WITS 02	4
C1	13.2771	0.22724	-1.48175	WITS 01	3		D2	4.53775	0.0370333	-3.29594	WITS 02	4
C1	13.4451	0.2288	-1.47491	WITS 01	3		D2	4.70586	0.0395833	-3.22935	WITS 02	4
C1	13.6131	0.23124	-1.4643	WITS 01	3		D2	4.87386	0.04065	-3.20276	WITS 02	4
C1	13.7812	0.23246	-1.45904	WITS 01	3		D2	5.04194	0.04335	-3.13845	WITS 02	4
C1	13.9492	0.23384	-1.45312	WITS 01	3		D2	5.21003	0.0461667	-3.0755	WITS 02	4
C1	14.1173	0.23504	-1.448	WITS 01	3		D2	5.37811	0.04775	-3.04178	WITS 02	4
C1	14.2853	0.2349	-1.4486	WITS 01	3		D2	5.54622	0.04945	-3.00679	WITS 02	4
C1	14.4534	0.23484	-1.44885	WITS 01	3		D2	5.71422	0.05245	-2.94789	WITS 02	4
C1	14.6215	0.23444	-1.45056	WITS 01	3		D2	5.88231	0.0555	-2.89137	WITS 02	4
C1	14.7895	0.23246	-1.45904	WITS 01	3		D2	6.05042	0.0572167	-2.86091	WITS 02	4
C1	14.9576	0.23084	-1.46603	WITS 01	3		D2	6.21842	0.0601333	-2.81119	WITS 02	4
C1	15.1257	0.22898	-1.47412	WITS 01	3		D2	6.3865	0.0624667	-2.77312	WITS 02	4
C1	15.2937	0.22624	-1.48616	WITS 01	3		D2	6.55461	0.0645167	-2.74083	WITS 02	4
C1	15.4618	0.22466	-1.49317	WITS 01	3		D2	6.72261	0.0676333	-2.69365	WITS 02	4
C1	15.6298	0.22178	-1.50607	WITS 01	3		D2	6.89069	0.0693667	-2.66835	WITS 02	4
C1	15.7979	0.21978	-1.51513	WITS 01	3		D2	7.05869	0.0718667	-2.63294	WITS 02	4
C1	15.9659	0.21786	-1.5239	WITS 01	3		D2	7.22678	0.0748333	-2.59249	WITS 02	4
C1	16.134	0.2159	-1.53294	WITS 01	3		D2	7.39478	0.07705	-2.5633	WITS 02	4
C1	16.3021	0.21326	-1.54524	WITS 01	3		D2	7.56289	0.0798333	-2.52781	WITS 02	4
C1	16.4701	0.21122	-1.55486	WITS 01	3		D2	7.73097	0.0824	-2.49617	WITS 02	4
C1	16.6382	0.20896	-1.56561	WITS 01	3		D2	7.89897	0.0845	-2.471	WITS 02	4
C1	16.8062	0.20702	-1.57494	WITS 01	3		D2	8.06708	0.0875667	-2.43535	WITS 02	4
C1	16.9743	0.20566	-1.58153	WITS 01	3		D2	8.23517	0.0897333	-2.41091	WITS 02	4
C1	17.1423	0.20242	-1.59741	WITS 01	3		D2	8.40317	0.0922167	-2.38361	WITS 02	4
C1	17.3104	0.20142	-1.60236	WITS 01	3		D2	8.57128	0.0943167	-2.3611	WITS 02	4
C1	17.4784	0.20042	-1.60734	WITS 01	3		D2	8.73936	0.0974167	-2.32876	WITS 02	4
C1	17.6464	0.19856	-1.61666	WITS 01	3		D2	8.90744	0.09965	-2.30609	WITS 02	4
C1	17.8146	0.1964	-1.6276	WITS 01	3		D2	9.07553	0.102867	-2.27432	WITS 02	4
C1	17.9826	0.1946	-1.63681	WITS 01	3		D2	9.24356	0.104	-2.26336	WITS 02	4
C1	18.1506	0.19288	-1.64569	WITS 01	3		D2	9.41164	0.1077	-2.22841	WITS 02	4
C1	18.3186	0.19162	-1.65224	WITS 01	3		D2	9.57964	0.109367	-2.21305	WITS 02	4
C1	18.4868	0.19038	-1.65873	WITS 01	3		D2	9.74772	0.112067	-2.18866	WITS 02	4
C1	18.6548	0.18898	-1.66611	WITS 01	3		D2	9.91572	0.11375	-2.17375	WITS 02	4
C1	18.8229	0.18724	-1.67536	WITS 01	3		D2	10.0838	0.116517	-2.14972	WITS 02	4
C1	18.9909	0.18626	-1.68061	WITS 01	3		D2	10.2518	0.119467	-2.12472	WITS 02	4
C1	19.159	0.1852	-1.68632	WITS 01	3		D2	10.4199	0.121733	-2.10592	WITS 02	4
C1	19.327	0.18396	-1.69304	WITS 01	3		D2	10.5879	0.122783	-2.09733	WITS 02	4
C1	19.4951	0.1817	-1.7054	WITS 01	3		D2	10.756	0.125683	-2.07399	WITS 02	4
C1	19.6632	0.18024	-1.71347	WITS 01	3		D2	10.9241	0.127467	-2.0599	WITS 02	4
C1	19.8312	0.17986	-1.71558	WITS 01	3		D2	11.0921	0.129983	-2.04035	WITS 02	4
C1	19.9993	0.17726	-1.73014	WITS 01	3		D2	11.2602	0.1307	-2.03485	WITS 02	4
C2	0	0.00438	-5.43071	WITS 02	3		D2	11.4283	0.132867	-2.01841	WITS 02	4
C2	0.168028	0.0055	-5.20301	WITS 02	3		D2	11.5964	0.13355	-2.01328	WITS 02	4
C2	0.336	0.00552	-5.19938	WITS 02	3		D2	11.7644	0.13605	-1.99473	WITS 02	4
C2	0.504083	0.006	-5.116	WITS 02	3		D2	11.9328	0.136667	-1.99021	WITS 02	4
C2	0.672167	0.00672	-5.00267	WITS 02	3		D2	12.1009	0.138967	-1.97352	WITS 02	4
C2	0.84025	0.00732	-4.91715	WITS 02	3		D2	12.2689	0.138167	-1.97929	WITS 02	4
C2	1.00836	0.00846	-4.77241	WITS 02	3		D2	12.4369	0.14025	-1.96433	WITS 02	4
C2	1.17644	0.01	-4.60517	WITS 02	3		D2	12.6049	0.1416	-1.95475	WITS 02	4
C2	1.34444	0.01106	-4.50442	WITS 02	3		D2	12.773	0.141967	-1.95216	WITS 02	4
C2	1.51256	0.0128	-4.35831	WITS 02	3		D2	12.9411	0.142267	-1.95005	WITS 02	4
C2	1.68064	0.0145	-4.23361	WITS 02	3		D2	13.1091	0.144317	-1.93575	WITS 02	4
C2	1.84864	0.01616	-4.12522	WITS 02	3		D2	13.2772	0.145383	-1.92838	WITS 02	4
C2	2.01675	0.01814	-4.00964	WITS 02	3		D2	13.4452	0.145467	-1.92781	WITS 02	4
C2	2.18483	0.0199	-3.91704	WITS 02	3		D2	13.6133	0.145583	-1.92701	WITS 02	4
C2	2.35283	0.02224	-3.80586	WITS 02	3		D2	13.7813	0.145667	-1.92643	WITS 02	4
C2	2.52092	0.02432	-3.71646	WITS 02	3		D2	13.9494	0.147417	-1.91449	WITS 02	4
C2	2.68903	0.02712	-3.60748	WITS 02	3		D2	14.1175	0.14745	-1.91427	WITS 02	4
C2	2.85703	0.02994	-3.50856	WITS 02	3		D2	14.2856	0.148967	-1.90403	WITS 02	4
C2	3.02514	0.03248	-3.42713	WITS 02	3		D2	14.4537	0.1489	-1.90448	WITS 02	4
C2	3.19322	0.03528	-3.34444	WITS 02	3		D2	14.6217	0.149617	-1.89968	WITS 02	4
C2	3.36122	0.03844	-3.25866	WITS 02	3		D2	14.7898	0.150033	-1.8969	WITS 02	4
C2	3.52931	0.04152	-3.18158	WITS 02	3		D2	14.9579	0.150433	-1.89424	WITS 02	4
C2	3.69742	0.04472	-3.10733	WITS 02	3		D2	15.126	0.1505	-1.89379	WITS 02	4
C2	3.86542	0.04818	-3.03281	WITS 02	3		D2	15.294	0.1514	-1.88783	WITS 02	4
C2	4.0335	0.05136	-2.9689	WITS 02	3		D2	15.4621	0.152333	-1.88168	WITS 02	4
C2	4.20161	0.05528	-2.89534	WITS 02	3		D2	15.6301	0.151067	-1.89003	WITS 02	4
C2	4.36961	0.05944	-2.82279	WITS 02	3		D2	15.7982	0.15195	-1.8842	WITS 02	4
C2	4.53761	0.0637	-2.75357	WITS 02	3		D2	15.9662	0.153333	-1.87514	WITS 02	4
C2	4.70572	0.06746	-2.69622	WITS 02	3		D2	16.1343	0.154533	-1.86735	WITS 02	4
C2	4.87372	0.07154	-2.6375	WITS 02	3		D2	16.3024	0.1562	-1.85662	WITS 02	4
C2	5.04181	0.07574	-2.58045	WITS 02	3		D2	16.4704	0.155733	-1.85961	WITS 02	4
C2	5.20989	0.07954	-2.5315	WITS 02	3		D2	16.6384	0.1556	-1.86047	WITS 02	4
C2	5.37792	0.08396	-2.47741	WITS 02	3		D2	16.8065	0.15695	-1.85183	WITS 02	4
C2	5.546	0.0881	-2.42928	WITS 02	3		D2	16.9745	0.157717	-1.84696	WITS 02	4
C2	5.714	0.0921	-2.38488	WITS 02	3		D2	17.1426	0.156333	-1.85576	WITS 02	4
C2	5.88203	0.09658	-2.33738	WITS 02	3		D2	17.3107	0.157383	-1.84907	WITS 02	4
C2	6.05011	0.10028	-2.29979	WITS 02	3		D2	17.4788	0.157917	-1.84569	WITS 02	4
C2	6.21819	0.10432	-2.26029	WITS 02	3		D2	17.6469	0.159483	-1.83582	WITS 02	4
C2	6.38622	0.10852	-2.22082	WITS 02	3		D2	17.8149	0.158783	-1.84021	WITS 02	4
C2	6.55431	0.11178	-2.19122	WITS 02	3		D2	17.983	0.16065	-1.82853	WITS 02	4
C2	6.72239	0.11578	-2.15606	WITS 02	3		D2	18.1511	0.159383	-1.83644	WITS 02	4
C2	6.89042	0.1193	-2.12611	WITS 02	3		D2	18.3191	0.16265	-1.81615	WITS 02	4
C2	7.0585	0.1237	-2.0899	WITS 02	3		D2	18.4872	0.1628	-1.81523	WITS 02	4
C2	7.22658	0.12714	-2.06247	WITS 02	3		D2	18.6553	0.161883	-1.82088	WITS 02	4
C2	7.39461	0.13122	-2.03088	WITS 02	3		D2	18.8233	0.161233	-1.8249	WITS 02	4
C2	7.56261	0.13474	-2.00441	WITS 02	3		D2	18.9914	0.161283	-1.82459	WITS 02	4
C2	7.73069	0.1383	-1.97833	WITS 02	3		D2	19.1594	0.1612	-1.82511	WITS 02	4
C2	7.89881	0.14234	-1.94954	WITS 02	3		D2	19.3275	0.160017	-1.83248	WITS 02	4
C2	8.06681	0.14664	-1.91977	WITS 02	3		D2	19.4955	0.1593	-1.83697	WITS 02	4
C2	8.23489	0.14978	-1.89859	WITS 02	3		D2	19.6636	0.1589	-1.83948	WITS 02	4
C2	8.40289	0.15408	-1.87028	WITS 02	3		D2	19.8316	0.157117	-1.85077	WITS 02	4
C2	8.571	0.1571	-1.85087	WITS 02	3		D2	19.9997	0.15535	-1.86207	WITS 02	4
C2	8.73908	0.1609	-1.82697	WITS 02	3		D3	1.34444	0.0069	-4.97623	WITS 11	4
C2	8.90708	0.16418	-1.80679	WITS 02	3		D3	1.51256	0.0069	-4.97623	WITS 11	4
C2	9.07519	0.16766	-1.78582	WITS 02	3		D3	1.68064	0.00765	-4.87305	WITS 11	4
C2	9.24328	0.17148	-1.76329	WITS 02	3		D3	1.84864	0.0082	-4.80362	WITS 11	4
C2	9.41139	0.17484	-1.74388	WITS 02	3		D3	2.01675	0.008575	-4.7589	WITS 11	4
C2	9.57939	0.17798	-1.72608	WITS 02	3		D3	2.18483	0.00905	-4.70499	WITS 11	4
C2	9.74747	0.18158	-1.70606	WITS 02	3		D3	2.35283	0.00995	-4.61018	WITS 11	4
C2	9.91558	0.18414	-1.69206	WITS 02	3		D3	2.52092	0.0109	-4.51899	WITS 11	4
C2	10.0836	0.18688	-1.67729	WITS 02	3		D3	2.68903	0.0118	-4.43966	WITS 11	4
C2	10.2517	0.1904	-1.65863	WITS 02	3		D3	2.85703	0.01275	-4.36222	WITS 11	4
C2	10.4198	0.19242	-1.64807	WITS 02	3		D3	3.02511	0.0137	-4.29036	WITS 11	4
C2	10.5878	0.19518	-1.63383	WITS 02	3		D3	3.19322	0.01465	-4.22331	WITS 11	4
C2	10.7559	0.19752	-1.62192	WITS 02	3		D3	3.36131	0.0164	-4.11047	WITS 11	4
C2	10.9239	0.20016	-1.60864	WITS 02	3		D3	3.52939	0.017825	-4.02715	WITS 11	4
C2	11.092	0.20244	-1.59731	WITS 02	3		D3	3.6975	0.0195	-3.93734	WITS 11	4
C2	11.2601	0.20584	-1.58066	WITS 02	3		D3	3.8655	0.0207	-3.87762	WITS 11	4
C2	11.4281	0.20754	-1.57243	WITS 02	3		D3	4.03358	0.02275	-3.78319	WITS 11	4
C2	11.5961	0.20956	-1.56275	WITS 02	3		D3	4.20167	0.0237	-3.74228	WITS 11	4
C2	11.7643	0.21274	-1.54768	WITS 02	3		D3	4.36975	0.025775	-3.65835	WITS 11	4
C2	11.9326	0.2137	-1.54318	WITS 02	3		D3	4.53775	0.027125	-3.6073	WITS 11	4
C2	12.1006	0.216	-1.53248	WITS 02	3		D3	4.70586	0.028975	-3.54132	WITS 11	4
C2	12.2687	0.21908	-1.51832	WITS 02	3		D3	4.87386	0.03065	-3.48512	WITS 11	4
C2	12.4367	0.22092	-1.50995	WITS 02	3		D3	5.04194	0.03195	-3.44358	WITS 11	4
C2	12.6047	0.22278	-1.50157	WITS 02	3		D3	5.21003	0.034625	-3.36318	WITS 11	4
C2	12.7729	0.22518	-1.49086	WITS 02	3		D3	5.37811	0.036375	-3.31387	WITS 11	4
C2	12.9409	0.22768	-1.47981	WITS 02	3		D3	5.54622	0.038	-3.27017	WITS 11	4
C2	13.1089	0.22936	-1.47246	WITS 02	3		D3	5.71422	0.040075	-3.217	WITS 11	4
C2	13.2771	0.23216	-1.46033	WITS 02	3		D3	5.88231	0.04235	-3.16179	WITS 11	4
C2	13.4451	0.23342	-1.45492	WITS 02	3		D3	6.05042	0.044675	-3.10834	WITS 11	4
C2	13.6131	0.23564	-1.44545	WITS 02	3		D3	6.21842	0.0467	-3.06401	WITS 11	4
C2	13.7812	0.23684	-1.44037	WITS 02	3		D3	6.3865	0.04915	-3.01288	WITS 11	4
C2	13.9492	0.23804	-1.43532	WITS 02	3		D3	6.55461	0.05125	-2.97104	WITS 11	4
C2	14.1173	0.23878	-1.43221	WITS 02	3		D3	6.72261	0.05285	-2.9403	WITS 11	4
C2	14.2853	0.23768	-1.43683	WITS 02	3		D3	6.89069	0.0548	-2.90407	WITS 11	4
C2	14.4534	0.23808	-1.43515	WITS 02	3		D3	7.05869	0.057525	-2.85554	WITS 11	4
C2	14.6215	0.23658	-1.44147	WITS 02	3		D3	7.22678	0.059625	-2.81968	WITS 11	4
C2	14.7895	0.2353	-1.44689	WITS 02	3		D3	7.39478	0.062075	-2.77941	WITS 11	4
C2	14.9576	0.23294	-1.45697	WITS 02	3		D3	7.56289	0.065125	-2.73145	WITS 11	4
C2	15.1257	0.23116	-1.46465	WITS 02	3		D3	7.73097	0.06595	-2.71886	WITS 11	4
C2	15.2937	0.22972	-1.47089	WITS 02	3		D3	7.89897	0.068775	-2.67691	WITS 11	4
C2	15.4618	0.22744	-1.48087	WITS 02	3		D3	8.06708	0.07175	-2.63457	WITS 11	4
C2	15.6298	0.2253	-1.49032	WITS 02	3		D3	8.23517	0.072575	-2.62313	WITS 11	4
C2	15.7979	0.2236	-1.4979	WITS 02	3		D3	8.40317	0.07505	-2.5896	WITS 11	4
C2	15.9659	0.2219	-1.50553	WITS 02	3		D3	8.57128	0.078775	-2.54116	WITS 11	4
C2	16.134	0.21988	-1.51467	WITS 02	3		D3	8.73936	0.080075	-2.52479	WITS 11	4
C2	16.3021	0.21728	-1.52657	WITS 02	3		D3	8.90744	0.082625	-2.49344	WITS 11	4
C2	16.4701	0.21564	-1.53414	WITS 02	3		D3	9.07553	0.0842	-2.47456	WITS 11	4
C2	16.6382	0.21366	-1.54337	WITS 02	3		D3	9.24356	0.084925	-2.46599	WITS 11	4
C2	16.8062	0.21172	-1.55249	WITS 02	3		D3	9.41164	0.08795	-2.43099	WITS 11	4
C2	16.9743	0.21076	-1.55704	WITS 02	3		D3	9.57964	0.0909	-2.398	WITS 11	4
C2	17.1423	0.20808	-1.56983	WITS 02	3		D3	9.74772	0.0938	-2.36659	WITS 11	4
C2	17.3104	0.20646	-1.57765	WITS 02	3		D3	9.91572	0.094475	-2.35942	WITS 11	4
C2	17.4784	0.20496	-1.58494	WITS 02	3		D3	10.0838	0.098025	-2.32253	WITS 11	4
C2	17.6464	0.20302	-1.59445	WITS 02	3		D3	10.2518	0.100525	-2.29735	WITS 11	4
C2	17.8146	0.20192	-1.59988	WITS 02	3		D3	10.4199	0.1018	-2.28475	WITS 11	4
C2	17.9826	0.2	-1.60944	WITS 02	3		D3	10.5879	0.105575	-2.24833	WITS 11	4
C2	18.1506	0.19832	-1.61787	WITS 02	3		D3	10.756	0.10595	-2.24479	WITS 11	4
C2	18.3186	0.1965	-1.62709	WITS 02	3		D3	10.9241	0.107725	-2.22817	WITS 11	4
C2	18.4868	0.1957	-1.63117	WITS 02	3		D3	11.0921	0.1101	-2.20637	WITS 11	4
C2	18.6548	0.19458	-1.63691	WITS 02	3		D3	11.2602	0.1124	-2.18569	WITS 11	4
C2	18.8229	0.1928	-1.6461	WITS 02	3		D3	11.4283	0.11455	-2.16674	WITS 11	4
C2	18.9909	0.19154	-1.65266	WITS 02	3		D3	11.5964	0.1158	-2.15589	WITS 11	4
C2	19.159	0.191	-1.65548	WITS 02	3		D3	11.7644	0.11685	-2.14686	WITS 11	4
C2	19.327	0.18956	-1.66305	WITS 02	3		D3	11.9328	0.118	-2.13707	WITS 11	4
C2	19.4951	0.18778	-1.67248	WITS 02	3		D3	12.1009	0.120425	-2.11673	WITS 11	4
C2	19.6632	0.18598	-1.68212	WITS 02	3		D3	12.2689	0.1196	-2.1236	WITS 11	4
C2	19.8312	0.18562	-1.68405	WITS 02	3		D3	12.4369	0.1215	-2.10784	WITS 11	4
C2	19.9993	0.1834	-1.69609	WITS 02	3		D3	12.6049	0.123075	-2.09496	WITS 11	4
C3	0	0.00346	-5.66649	WITS 11	3		D3	12.773	0.124	-2.08747	WITS 11	4
C3	0.168028	0.00518	-5.26295	WITS 11	3		D3	12.9411	0.12445	-2.08385	WITS 11	4
C3	0.336	0.00444	-5.4171	WITS 11	3		D3	13.1091	0.1259	-2.07227	WITS 11	4
C3	0.504083	0.00478	-5.34331	WITS 11	3		D3	13.2772	0.1256	-2.07465	WITS 11	4
C3	0.672167	0.0057	-5.16729	WITS 11	3		D3	13.4452	0.125825	-2.07286	WITS 11	4
C3	0.84025	0.00618	-5.08644	WITS 11	3		D3	13.6133	0.127175	-2.06219	WITS 11	4
C3	1.00836	0.00752	-4.89019	WITS 11	3		D3	13.7813	0.12675	-2.06554	WITS 11	4
C3	1.17644	0.00892	-4.71946	WITS 11	3		D3	13.9494	0.128925	-2.04852	WITS 11	4
C3	1.34444	0.01002	-4.60317	WITS 11	3		D3	14.1175	0.128225	-2.05397	WITS 11	4
C3	1.51256	0.01164	-4.45331	WITS 11	3		D3	14.2856	0.129675	-2.04272	WITS 11	4
C3	1.68064	0.01362	-4.29622	WITS 11	3		D3	14.4537	0.12965	-2.04292	WITS 11	4
C3	1.84864	0.01568	-4.15537	WITS 11	3		D3	14.6217	0.13035	-2.03753	WITS 11	4
C3	2.01675	0.01772	-4.03306	WITS 11	3		D3	14.7898	0.12875	-2.04988	WITS 11	4
C3	2.18483	0.01972	-3.92612	WITS 11	3		D3	14.9579	0.129825	-2.04157	WITS 11	4
C3	2.35283	0.0223	-3.80317	WITS 11	3		D3	15.126	0.13255	-2.0208	WITS 11	4
C3	2.52092	0.0246	-3.70501	WITS 11	3		D3	15.294	0.1329	-2.01816	WITS 11	4
C3	2.68903	0.02744	-3.59575	WITS 11	3		D3	15.4621	0.13245	-2.02155	WITS 11	4
C3	2.85703	0.03072	-3.48284	WITS 11	3		D3	15.6301	0.13235	-2.02231	WITS 11	4
C3	3.02514	0.0334	-3.3992	WITS 11	3		D3	15.7982	0.1338	-2.01141	WITS 11	4
C3	3.19322	0.03636	-3.31429	WITS 11	3		D3	15.9662	0.133425	-2.01422	WITS 11	4
C3	3.36122	0.03944	-3.23297	WITS 11	3		D3	16.1343	0.13525	-2.00063	WITS 11	4
C3	3.52931	0.0429	-3.14888	WITS 11	3		D3	16.3024	0.134925	-2.00304	WITS 11	4
C3	3.69742	0.04648	-3.06873	WITS 11	3		D3	16.4704	0.13535	-1.99989	WITS 11	4
C3	3.86542	0.05044	-2.98697	WITS 11	3		D3	16.6384	0.135825	-1.99639	WITS 11	4
C3	4.0335	0.05404	-2.91803	WITS 11	3		D3	16.8065	0.136625	-1.99052	WITS 11	4
C3	4.20161	0.0581	-2.84559	WITS 11	3		D3	16.9745	0.137925	-1.98105	WITS 11	4
C3	4.36961	0.06218	-2.77772	WITS 11	3		D3	17.1426	0.13685	-1.98887	WITS 11	4
C3	4.53761	0.06706	-2.70217	WITS 11	3		D3	17.3107	0.13565	-1.99768	WITS 11	4
C3	4.70572	0.07066	-2.64988	WITS 11	3		D3	17.4788	0.136925	-1.98832	WITS 11	4
C3	4.87372	0.075	-2.59027	WITS 11	3		D3	17.6469	0.138175	-1.97923	WITS 11	4
C3	5.04181	0.07924	-2.53527	WITS 11	3		D3	17.8149	0.137975	-1.98068	WITS 11	4
C3	5.20989	0.0829	-2.49012	WITS 11	3		D3	17.983	0.137525	-1.98395	WITS 11	4
C3	5.37792	0.08708	-2.44093	WITS 11	3		D3	18.1511	0.139625	-1.9688	WITS 11	4
C3	5.546	0.09184	-2.38771	WITS 11	3		D3	18.3191	0.13965	-1.96862	WITS 11	4
C3	5.714	0.09586	-2.34487	WITS 11	3		D3	18.4872	0.138725	-1.97526	WITS 11	4
C3	5.88203	0.09988	-2.30379	WITS 11	3		D3	18.6553	0.140325	-1.96379	WITS 11	4
C3	6.05011	0.10416	-2.26183	WITS 11	3		D3	18.8233	0.13775	-1.98231	WITS 11	4
C3	6.21819	0.10848	-2.22119	WITS 11	3		D3	18.9914	0.139025	-1.9731	WITS 11	4
C3	6.38622	0.1126	-2.18391	WITS 11	3		D3	19.1594	0.137675	-1.98286	WITS 11	4
C3	6.55431	0.11562	-2.15745	WITS 11	3		D3	19.3275	0.137975	-1.98068	WITS 11	4
C3	6.72239	0.11998	-2.12043	WITS 11	3		D3	19.4955	0.13795	-1.98086	WITS 11	4
C3	6.89042	0.12332	-2.09297	WITS 11	3		D3	19.6636	0.137975	-1.98068	WITS 11	4
C3	7.0585	0.12816	-2.05448	WITS 11	3		D3	19.8316	0.13585	-1.9962	WITS 11	4
C3	7.22658	0.13104	-2.03225	WITS 11	3		D3	19.9997	0.1362	-1.99363	WITS 11	4
C3	7.39461	0.13588	-1.99598	WITS 11	3		D4	2.35283	0.0073	-4.91988	WITS 17	4
C3	7.56261	0.13888	-1.97415	WITS 11	3		D4	2.52092	0.00845	-4.77359	WITS 17	4
C3	7.73069	0.1431	-1.94421	WITS 11	3		D4	2.68903	0.009	-4.71053	WITS 17	4
C3	7.89881	0.1467	-1.91937	WITS 11	3		D4	2.85703	0.0099	-4.61522	WITS 17	4
C3	8.06681	0.15134	-1.88823	WITS 11	3		D4	3.02511	0.0109	-4.51899	WITS 17	4
C3	8.23489	0.15506	-1.86394	WITS 11	3		D4	3.19322	0.012075	-4.41662	WITS 17	4
C3	8.40289	0.15946	-1.83596	WITS 11	3		D4	3.36131	0.013625	-4.29585	WITS 17	4
C3	8.571	0.1633	-1.81217	WITS 11	3		D4	3.52939	0.014925	-4.20472	WITS 17	4
C3	8.73908	0.16622	-1.79444	WITS 11	3		D4	3.6975	0.0163	-4.11659	WITS 17	4
C3	8.90708	0.1699	-1.77255	WITS 11	3		D4	3.8655	0.018425	-3.99405	WITS 17	4
C3	9.07519	0.17354	-1.75135	WITS 11	3		D4	4.03358	0.020825	-3.8716	WITS 17	4
C3	9.24328	0.17718	-1.73059	WITS 11	3		D4	4.20167	0.022375	-3.79981	WITS 17	4
C3	9.41139	0.18064	-1.71125	WITS 11	3		D4	4.36975	0.02445	-3.71113	WITS 17	4
C3	9.57939	0.18298	-1.69838	WITS 11	3		D4	4.53775	0.02655	-3.62873	WITS 17	4
C3	9.74747	0.18656	-1.679	WITS 11	3		D4	4.70586	0.02885	-3.54565	WITS 17	4
C3	9.91558	0.18932	-1.66432	WITS 11	3		D4	4.87386	0.0309	-3.477	WITS 17	4
C3	10.0836	0.19172	-1.65172	WITS 11	3		D4	5.04194	0.0334	-3.3992	WITS 17	4
C3	10.2517	0.19504	-1.63455	WITS 11	3		D4	5.21003	0.035675	-3.33331	WITS 17	4
C3	10.4198	0.19696	-1.62475	WITS 11	3		D4	5.37811	0.037875	-3.27346	WITS 17	4
C3	10.5878	0.20058	-1.60654	WITS 11	3		D4	5.54622	0.0407	-3.20153	WITS 17	4
C3	10.7559	0.20262	-1.59642	WITS 11	3		D4	5.71422	0.043575	-3.13327	WITS 17	4
C3	10.9239	0.20462	-1.5866	WITS 11	3		D4	5.88231	0.046375	-3.07099	WITS 17	4
C3	11.092	0.2074	-1.57311	WITS 11	3		D4	6.05042	0.0492	-3.01186	WITS 17	4
C3	11.2601	0.21054	-1.55808	WITS 11	3		D4	6.21842	0.05175	-2.96133	WITS 17	4
C3	11.4281	0.21288	-1.54703	WITS 11	3		D4	6.3865	0.0547	-2.90589	WITS 17	4
C3	11.5961	0.21568	-1.53396	WITS 11	3		D4	6.55461	0.057475	-2.85641	WITS 17	4
C3	11.7643	0.21732	-1.52638	WITS 11	3		D4	6.72261	0.060825	-2.79975	WITS 17	4
C3	11.9326	0.21976	-1.51522	WITS 11	3		D4	6.89069	0.0642	-2.74575	WITS 17	4
C3	12.1006	0.22152	-1.50724	WITS 11	3		D4	7.05869	0.066275	-2.71394	WITS 17	4
C3	12.2687	0.22428	-1.49486	WITS 11	3		D4	7.22678	0.069675	-2.66391	WITS 17	4
C3	12.4367	0.22572	-1.48846	WITS 11	3		D4	7.39478	0.0727	-2.62141	WITS 17	4
C3	12.6047	0.22772	-1.47964	WITS 11	3		D4	7.56289	0.075725	-2.58065	WITS 17	4
C3	12.7729	0.22998	-1.46976	WITS 11	3		D4	7.73097	0.0783	-2.54721	WITS 17	4
C3	12.9409	0.23318	-1.45594	WITS 11	3		D4	7.89897	0.08155	-2.50654	WITS 17	4
C3	13.1089	0.23466	-1.44962	WITS 11	3		D4	8.06708	0.08435	-2.47278	WITS 17	4
C3	13.2771	0.23664	-1.44122	WITS 11	3		D4	8.23517	0.085775	-2.45603	WITS 17	4
C3	13.4451	0.2381	-1.43506	WITS 11	3		D4	8.40317	0.0894	-2.41463	WITS 17	4
C3	13.6131	0.23858	-1.43305	WITS 11	3		D4	8.57128	0.0929	-2.37623	WITS 17	4
C3	13.7812	0.2401	-1.4267	WITS 11	3		D4	8.73936	0.09395	-2.36499	WITS 17	4
C3	13.9492	0.2397	-1.42837	WITS 11	3		D4	8.90744	0.098125	-2.32151	WITS 17	4
C3	14.1173	0.23878	-1.43221	WITS 11	3		D4	9.07553	0.09935	-2.30911	WITS 17	4
C3	14.2853	0.23796	-1.43565	WITS 11	3		D4	9.24356	0.1023	-2.27985	WITS 17	4
C3	14.4534	0.2367	-1.44096	WITS 11	3		D4	9.41164	0.10565	-2.24762	WITS 17	4
C3	14.6215	0.23356	-1.45432	WITS 11	3		D4	9.57964	0.107975	-2.22586	WITS 17	4
C3	14.7895	0.23198	-1.4611	WITS 11	3		D4	9.74772	0.11035	-2.2041	WITS 17	4
C3	14.9576	0.22914	-1.47342	WITS 11	3		D4	9.91572	0.11375	-2.17375	WITS 17	4
C3	15.1257	0.2272	-1.48192	WITS 11	3		D4	10.0838	0.115975	-2.15438	WITS 17	4
C3	15.2937	0.22602	-1.48713	WITS 11	3		D4	10.2518	0.1201	-2.11943	WITS 17	4
C3	15.4618	0.22346	-1.49852	WITS 11	3		D4	10.4199	0.12315	-2.09435	WITS 17	4
C3	15.6298	0.21974	-1.51531	WITS 11	3		D4	10.5879	0.122975	-2.09577	WITS 17	4
C3	15.7979	0.21826	-1.52207	WITS 11	3		D4	10.756	0.126775	-2.06534	WITS 17	4
C3	15.9659	0.21692	-1.52823	WITS 11	3		D4	10.9241	0.128	-2.05573	WITS 17	4
C3	16.134	0.21394	-1.54206	WITS 11	3		D4	11.0921	0.129975	-2.04041	WITS 17	4
C3	16.3021	0.21328	-1.54515	WITS 11	3		D4	11.2602	0.133975	-2.0101	WITS 17	4
C3	16.4701	0.2104	-1.55874	WITS 11	3		D4	11.4283	0.135375	-1.99971	WITS 17	4
C3	16.6382	0.20892	-1.5658	WITS 11	3		D4	11.5964	0.13775	-1.98231	WITS 17	4
C3	16.8062	0.20634	-1.57823	WITS 11	3		D4	11.7644	0.139225	-1.97166	WITS 17	4
C3	16.9743	0.20484	-1.58553	WITS 11	3		D4	11.9328	0.142225	-1.95034	WITS 17	4
C3	17.1423	0.20306	-1.59425	WITS 11	3		D4	12.1009	0.141175	-1.95776	WITS 17	4
C3	17.3104	0.20084	-1.60525	WITS 11	3		D4	12.2689	0.1439	-1.93864	WITS 17	4
C3	17.4784	0.199	-1.61445	WITS 11	3		D4	12.4369	0.14365	-1.94038	WITS 17	4
C3	17.6464	0.19722	-1.62344	WITS 11	3		D4	12.6049	0.14615	-1.92312	WITS 17	4
C3	17.8146	0.19648	-1.62719	WITS 11	3		D4	12.773	0.14675	-1.91902	WITS 17	4
C3	17.9826	0.19454	-1.63712	WITS 11	3		D4	12.9411	0.146875	-1.91817	WITS 17	4
C3	18.1506	0.19328	-1.64362	WITS 11	3		D4	13.1091	0.149825	-1.89829	WITS 17	4
C3	18.3186	0.19068	-1.65716	WITS 11	3		D4	13.2772	0.151575	-1.88667	WITS 17	4
C3	18.4868	0.19076	-1.65674	WITS 11	3		D4	13.4452	0.15135	-1.88816	WITS 17	4
C3	18.6548	0.18908	-1.66559	WITS 11	3		D4	13.6133	0.1538	-1.8721	WITS 17	4
C3	18.8229	0.1869	-1.67718	WITS 11	3		D4	13.7813	0.154225	-1.86934	WITS 17	4
C3	18.9909	0.18646	-1.67954	WITS 11	3		D4	13.9494	0.15615	-1.85694	WITS 17	4
C3	19.159	0.18458	-1.68967	WITS 11	3		D4	14.1175	0.155925	-1.85838	WITS 17	4
C3	19.327	0.18374	-1.69423	WITS 11	3		D4	14.2856	0.1564	-1.85534	WITS 17	4
C3	19.4951	0.1826	-1.70046	WITS 11	3		D4	14.4537	0.158525	-1.84184	WITS 17	4
C3	19.6632	0.17972	-1.71636	WITS 11	3		D4	14.6217	0.15925	-1.83728	WITS 17	4
C3	19.8312	0.17974	-1.71624	WITS 11	3		D4	14.7898	0.16015	-1.83164	WITS 17	4
C3	19.9993	0.17862	-1.72249	WITS 11	3		D4	14.9579	0.160625	-1.82868	WITS 17	4
C4	0	0.00293333	-5.83162	WITS 17	3		D4	15.126	0.161875	-1.82093	WITS 17	4
C4	0.168028	0.00451667	-5.39998	WITS 17	3		D4	15.294	0.163775	-1.80926	WITS 17	4
C4	0.336	0.00396667	-5.52983	WITS 17	3		D4	15.4621	0.163	-1.81401	WITS 17	4
C4	0.504083	0.00423333	-5.46477	WITS 17	3		D4	15.6301	0.1653	-1.79999	WITS 17	4
C4	0.672167	0.0048	-5.33914	WITS 17	3		D4	15.7982	0.166725	-1.79141	WITS 17	4
C4	0.84025	0.0056	-5.18499	WITS 17	3		D4	15.9662	0.167925	-1.78424	WITS 17	4
C4	1.00836	0.00665	-5.01314	WITS 17	3		D4	16.1343	0.16755	-1.78647	WITS 17	4
C4	1.17644	0.00795	-4.83458	WITS 17	3		D4	16.3024	0.170025	-1.77181	WITS 17	4
C4	1.34444	0.00931667	-4.67595	WITS 17	3		D4	16.4704	0.169925	-1.7724	WITS 17	4
C4	1.51256	0.0106667	-4.54063	WITS 17	3		D4	16.6384	0.17085	-1.76697	WITS 17	4
C4	1.68064	0.0122	-4.40632	WITS 17	3		D4	16.8065	0.170525	-1.76887	WITS 17	4
C4	1.84864	0.01455	-4.23016	WITS 17	3		D4	16.9745	0.170175	-1.77093	WITS 17	4
C4	2.01675	0.0165333	-4.10238	WITS 17	3		D4	17.1426	0.1693	-1.77608	WITS 17	4
C4	2.18483	0.0186667	-3.98102	WITS 17	3		D4	17.3107	0.1695	-1.7749	WITS 17	4
C4	2.35283	0.0213167	-3.84827	WITS 17	3		D4	17.4788	0.16925	-1.77638	WITS 17	4
C4	2.52092	0.0235333	-3.74934	WITS 17	3		D4	17.6469	0.16755	-1.78647	WITS 17	4
C4	2.68903	0.0266667	-3.62434	WITS 17	3		D4	17.8149	0.166225	-1.79441	WITS 17	4
C4	2.85703	0.0300167	-3.506	WITS 17	3		D4	17.983	0.165325	-1.79984	WITS 17	4
C4	3.02514	0.033	-3.41125	WITS 17	3		D4	18.1511	0.1634	-1.81155	WITS 17	4
C4	3.19322	0.03595	-3.32563	WITS 17	3		D4	18.3191	0.162675	-1.816	WITS 17	4
C4	3.36122	0.0394	-3.23399	WITS 17	3		D4	18.4872	0.161375	-1.82402	WITS 17	4
C4	3.52931	0.0424	-3.16061	WITS 17	3		D4	18.6553	0.1594	-1.83634	WITS 17	4
C4	3.69742	0.0466	-3.06615	WITS 17	3		D4	18.8233	0.158575	-1.84153	WITS 17	4
C4	3.86542	0.0501667	-2.9924	WITS 17	3		D4	18.9914	0.156975	-1.85167	WITS 17	4
C4	4.0335	0.0543167	-2.91292	WITS 17	3		D4	19.1594	0.155575	-1.86063	WITS 17	4
C4	4.20161	0.0580333	-2.84674	WITS 17	3		D4	19.3275	0.153475	-1.87422	WITS 17	4
C4	4.36961	0.0628333	-2.76727	WITS 17	3		D4	19.4955	0.1521	-1.88322	WITS 17	4
C4	4.53761	0.0675667	-2.69464	WITS 17	3		D4	19.6636	0.151175	-1.88932	WITS 17	4
C4	4.70572	0.0718333	-2.63341	WITS 17	3		D4	19.8316	0.149375	-1.9013	WITS 17	4
C4	4.87372	0.07615	-2.57505	WITS 17	3		D4	19.9997	0.148475	-1.90734	WITS 17	4
C4	5.04181	0.0805	-2.5195	WITS 17	3		D5	1.17644	0.007025	-4.95828	WITS 19	4
C4	5.20989	0.08425	-2.47397	WITS 17	3		D5	1.34444	0.007075	-4.95119	WITS 19	4
C4	5.37792	0.0891333	-2.41762	WITS 17	3		D5	1.51256	0.007275	-4.92331	WITS 19	4
C4	5.546	0.0943667	-2.36057	WITS 17	3		D5	1.68064	0.00805	-4.82208	WITS 19	4
C4	5.714	0.0987833	-2.31483	WITS 17	3		D5	1.84864	0.008675	-4.74731	WITS 19	4
C4	5.88203	0.102317	-2.27968	WITS 17	3		D5	2.01675	0.009025	-4.70776	WITS 19	4
C4	6.05011	0.10745	-2.23073	WITS 17	3		D5	2.18483	0.010075	-4.5977	WITS 19	4
C4	6.21819	0.111983	-2.18941	WITS 17	3		D5	2.35283	0.01125	-4.48739	WITS 19	4
C4	6.38622	0.115583	-2.15776	WITS 17	3		D5	2.52092	0.012625	-4.37208	WITS 19	4
C4	6.55431	0.119317	-2.12597	WITS 17	3		D5	2.68903	0.01375	-4.28672	WITS 19	4
C4	6.72239	0.1241	-2.08667	WITS 17	3		D5	2.85703	0.01485	-4.20976	WITS 19	4
C4	6.89042	0.127167	-2.06226	WITS 17	3		D5	3.02511	0.016425	-4.10895	WITS 19	4
C4	7.0585	0.131733	-2.02698	WITS 17	3		D5	3.19322	0.01775	-4.03137	WITS 19	4
C4	7.22658	0.1356	-1.99805	WITS 17	3		D5	3.36131	0.0196	-3.93223	WITS 19	4
C4	7.39461	0.139917	-1.96671	WITS 17	3		D5	3.52939	0.021275	-3.85022	WITS 19	4
C4	7.56261	0.14435	-1.93551	WITS 17	3		D5	3.6975	0.0226	-3.78981	WITS 19	4
C4	7.73069	0.148633	-1.90627	WITS 17	3		D5	3.8655	0.025375	-3.67399	WITS 19	4
C4	7.89881	0.152617	-1.87983	WITS 17	3		D5	4.03358	0.027325	-3.59995	WITS 19	4
C4	8.06681	0.155367	-1.86197	WITS 17	3		D5	4.20167	0.0288	-3.54738	WITS 19	4
C4	8.23489	0.160933	-1.82677	WITS 17	3		D5	4.36975	0.0308	-3.48024	WITS 19	4
C4	8.40289	0.164617	-1.80414	WITS 17	3		D5	4.53775	0.033175	-3.40596	WITS 19	4
C4	8.571	0.16905	-1.77756	WITS 17	3		D5	4.70586	0.035025	-3.35169	WITS 19	4
C4	8.73908	0.171767	-1.76162	WITS 17	3		D5	4.87386	0.0373	-3.28876	WITS 19	4
C4	8.90708	0.176283	-1.73566	WITS 17	3		D5	5.04194	0.0399	-3.22138	WITS 19	4
C4	9.07519	0.1801	-1.71424	WITS 17	3		D5	5.21003	0.041825	-3.17426	WITS 19	4
C4	9.24328	0.183767	-1.69409	WITS 17	3		D5	5.37811	0.043575	-3.13327	WITS 19	4
C4	9.41139	0.18635	-1.68013	WITS 17	3		D5	5.54622	0.046475	-3.06884	WITS 19	4
C4	9.57939	0.191	-1.65548	WITS 17	3		D5	5.71422	0.04915	-3.01288	WITS 19	4
C4	9.74747	0.194367	-1.63801	WITS 17	3		D5	5.88231	0.05135	-2.96909	WITS 19	4
C4	9.91558	0.196417	-1.62752	WITS 17	3		D5	6.05042	0.0538	-2.92248	WITS 19	4
C4	10.0836	0.200133	-1.60877	WITS 17	3		D5	6.21842	0.0561	-2.88062	WITS 19	4
C4	10.2517	0.202283	-1.59809	WITS 17	3		D5	6.3865	0.05815	-2.84473	WITS 19	4
C4	10.4198	0.205367	-1.58296	WITS 17	3		D5	6.55461	0.0605	-2.80511	WITS 19	4
C4	10.5878	0.20855	-1.56758	WITS 17	3		D5	6.72261	0.063	-2.76462	WITS 19	4
C4	10.7559	0.211567	-1.55322	WITS 17	3		D5	6.89069	0.06545	-2.72647	WITS 19	4
C4	10.9239	0.213683	-1.54326	WITS 17	3		D5	7.05869	0.067325	-2.69822	WITS 19	4
C4	11.092	0.21655	-1.52993	WITS 17	3		D5	7.22678	0.07	-2.65926	WITS 19	4
C4	11.2601	0.22035	-1.51254	WITS 17	3		D5	7.39478	0.072975	-2.61764	WITS 19	4
C4	11.4281	0.2205	-1.51186	WITS 17	3		D5	7.56289	0.0754	-2.58495	WITS 19	4
C4	11.5961	0.223717	-1.49737	WITS 17	3		D5	7.73097	0.077225	-2.56103	WITS 19	4
C4	11.7643	0.225467	-1.48958	WITS 17	3		D5	7.89897	0.079775	-2.52855	WITS 19	4
C4	11.9326	0.228183	-1.47761	WITS 17	3		D5	8.06708	0.0831	-2.48771	WITS 19	4
C4	12.1006	0.231583	-1.46282	WITS 17	3		D5	8.23517	0.084675	-2.46893	WITS 19	4
C4	12.2687	0.2337	-1.45372	WITS 17	3		D5	8.40317	0.087575	-2.43526	WITS 19	4
C4	12.4367	0.235	-1.44817	WITS 17	3		D5	8.57128	0.089375	-2.41491	WITS 19	4
C4	12.6047	0.238083	-1.43513	WITS 17	3		D5	8.73936	0.092075	-2.38515	WITS 19	4
C4	12.7729	0.23995	-1.42732	WITS 17	3		D5	8.90744	0.09405	-2.36393	WITS 19	4
C4	12.9409	0.243633	-1.41209	WITS 17	3		D5	9.07553	0.0968	-2.33511	WITS 19	4
C4	13.1089	0.246	-1.40242	WITS 17	3		D5	9.24356	0.098525	-2.31744	WITS 19	4
C4	13.2771	0.246633	-1.39985	WITS 17	3		D5	9.41164	0.101675	-2.28597	WITS 19	4
C4	13.4451	0.249533	-1.38816	WITS 17	3		D5	9.57964	0.1037	-2.26625	WITS 19	4
C4	13.6131	0.250967	-1.38244	WITS 17	3		D5	9.74772	0.106925	-2.23563	WITS 19	4
C4	13.7812	0.25235	-1.37694	WITS 17	3		D5	9.91572	0.1083	-2.22285	WITS 19	4
C4	13.9492	0.250367	-1.38483	WITS 17	3		D5	10.0838	0.11	-2.20727	WITS 19	4
C4	14.1173	0.250067	-1.38603	WITS 17	3		D5	10.2518	0.113025	-2.18015	WITS 19	4
C4	14.2853	0.25	-1.38629	WITS 17	3		D5	10.4199	0.115525	-2.15827	WITS 19	4
C4	14.4534	0.246583	-1.40006	WITS 17	3		D5	10.5879	0.116525	-2.14965	WITS 19	4
C4	14.6215	0.244933	-1.40677	WITS 17	3		D5	10.756	0.118325	-2.13432	WITS 19	4
C4	14.7895	0.242233	-1.41785	WITS 17	3		D5	10.9241	0.1195	-2.12444	WITS 19	4
C4	14.9576	0.240833	-1.42365	WITS 17	3		D5	11.0921	0.120675	-2.11465	WITS 19	4
C4	15.1257	0.2386	-1.43297	WITS 17	3		D5	11.2602	0.122325	-2.10107	WITS 19	4
C4	15.2937	0.2358	-1.44477	WITS 17	3		D5	11.4283	0.12555	-2.07505	WITS 19	4
C4	15.4618	0.232967	-1.45686	WITS 17	3		D5	11.5964	0.1248	-2.08104	WITS 19	4
C4	15.6298	0.231017	-1.46527	WITS 17	3		D5	11.7644	0.125975	-2.07167	WITS 19	4
C4	15.7979	0.229583	-1.47149	WITS 17	3		D5	11.9328	0.12765	-2.05846	WITS 19	4
C4	15.9659	0.226267	-1.48604	WITS 17	3		D5	12.1009	0.128875	-2.04891	WITS 19	4
C4	16.134	0.223467	-1.49849	WITS 17	3		D5	12.2689	0.12865	-2.05066	WITS 19	4
C4	16.3021	0.222683	-1.502	WITS 17	3		D5	12.4369	0.129375	-2.04504	WITS 19	4
C4	16.4701	0.220933	-1.50989	WITS 17	3		D5	12.6049	0.130025	-2.04003	WITS 19	4
C4	16.6382	0.218883	-1.51922	WITS 17	3		D5	12.773	0.13075	-2.03447	WITS 19	4
C4	16.8062	0.216333	-1.53093	WITS 17	3		D5	12.9411	0.13075	-2.03447	WITS 19	4
C4	16.9743	0.213767	-1.54287	WITS 17	3		D5	13.1091	0.132175	-2.02363	WITS 19	4
C4	17.1423	0.212883	-1.54701	WITS 17	3		D5	13.2772	0.131775	-2.02666	WITS 19	4
C4	17.3104	0.210833	-1.55669	WITS 17	3		D5	13.4452	0.1336	-2.01291	WITS 19	4
C4	17.4784	0.20775	-1.57142	WITS 17	3		D5	13.6133	0.133575	-2.01309	WITS 19	4
C4	17.6464	0.207	-1.57504	WITS 17	3		D5	13.7813	0.133625	-2.01272	WITS 19	4
C4	17.8146	0.20545	-1.58255	WITS 17	3		D5	13.9494	0.134475	-2.00638	WITS 19	4
C4	17.9826	0.202633	-1.59636	WITS 17	3		D5	14.1175	0.134625	-2.00526	WITS 19	4
C4	18.1506	0.20205	-1.59924	WITS 17	3		D5	14.2856	0.135125	-2.00156	WITS 19	4
C4	18.3186	0.200233	-1.60827	WITS 17	3		D5	14.4537	0.1359	-1.99584	WITS 19	4
C4	18.4868	0.198567	-1.61663	WITS 17	3		D5	14.6217	0.136325	-1.99271	WITS 19	4
C4	18.6548	0.19705	-1.6243	WITS 17	3		D5	14.7898	0.136675	-1.99015	WITS 19	4
C4	18.8229	0.196017	-1.62956	WITS 17	3		D5	14.9579	0.13805	-1.98014	WITS 19	4
C4	18.9909	0.19375	-1.64119	WITS 17	3		D5	15.126	0.137775	-1.98213	WITS 19	4
C4	19.159	0.193417	-1.64291	WITS 17	3		D5	15.294	0.1388	-1.97472	WITS 19	4
C4	19.327	0.192283	-1.64879	WITS 17	3		D5	15.4621	0.13915	-1.9722	WITS 19	4
C4	19.4951	0.191	-1.65548	WITS 17	3		D5	15.6301	0.13865	-1.9758	WITS 19	4
C4	19.6632	0.1894	-1.66389	WITS 17	3		D5	15.7982	0.139675	-1.96844	WITS 19	4
C4	19.8312	0.18815	-1.67052	WITS 17	3		D5	15.9662	0.1404	-1.96326	WITS 19	4
C4	19.9993	0.187483	-1.67407	WITS 17	3		D5	16.1343	0.14085	-1.96006	WITS 19	4
C5	0	0.00386	-5.55709	WITS 19	3		D5	16.3024	0.1411	-1.95829	WITS 19	4
C5	0.168028	0.00566	-5.17433	WITS 19	3		D5	16.4704	0.141025	-1.95882	WITS 19	4
C5	0.336	0.00434	-5.43988	WITS 19	3		D5	16.6384	0.141425	-1.95599	WITS 19	4
C5	0.504083	0.0048	-5.33914	WITS 19	3		D5	16.8065	0.1421	-1.95122	WITS 19	4
C5	0.672167	0.00562	-5.18142	WITS 19	3		D5	16.9745	0.141775	-1.95351	WITS 19	4
C5	0.84025	0.00602	-5.11267	WITS 19	3		D5	17.1426	0.141975	-1.9521	WITS 19	4
C5	1.00836	0.00728	-4.92262	WITS 19	3		D5	17.3107	0.1423	-1.94982	WITS 19	4
C5	1.17644	0.00912	-4.69729	WITS 19	3		D5	17.4788	0.141175	-1.95776	WITS 19	4
C5	1.34444	0.01	-4.60517	WITS 19	3		D5	17.6469	0.14125	-1.95722	WITS 19	4
C5	1.51256	0.01156	-4.4602	WITS 19	3		D5	17.8149	0.14035	-1.96362	WITS 19	4
C5	1.68064	0.01328	-4.3215	WITS 19	3		D5	17.983	0.140475	-1.96273	WITS 19	4
C5	1.84864	0.01566	-4.15665	WITS 19	3		D5	18.1511	0.140475	-1.96273	WITS 19	4
C5	2.01675	0.01776	-4.03081	WITS 19	3		D5	18.3191	0.1399	-1.96683	WITS 19	4
C5	2.18483	0.01962	-3.93121	WITS 19	3		D5	18.4872	0.1382	-1.97905	WITS 19	4
C5	2.35283	0.02262	-3.78892	WITS 19	3		D5	18.6553	0.1366	-1.9907	WITS 19	4
C5	2.52092	0.02496	-3.69048	WITS 19	3		D5	18.8233	0.135875	-1.99602	WITS 19	4
C5	2.68903	0.0279	-3.57913	WITS 19	3		D5	18.9914	0.13465	-2.00508	WITS 19	4
C5	2.85703	0.0312	-3.46734	WITS 19	3		D5	19.1594	0.1333	-2.01515	WITS 19	4
C5	3.02514	0.0342	-3.37553	WITS 19	3		D5	19.3275	0.133025	-2.01722	WITS 19	4
C5	3.19322	0.03722	-3.29091	WITS 19	3		D5	19.4955	0.131825	-2.02628	WITS 19	4
C5	3.36122	0.04072	-3.20104	WITS 19	3		D5	19.6636	0.131225	-2.03084	WITS 19	4
C5	3.52931	0.0438	-3.12812	WITS 19	3		D5	19.8316	0.12905	-2.04756	WITS 19	4
C5	3.69742	0.04806	-3.03531	WITS 19	3		D5	19.9997	0.127525	-2.05944	WITS 19	4
C5	3.86542	0.05134	-2.96929	WITS 19	3		D6	2.52092	0.00713333	-4.94298	WITS 21	4
C5	4.0335	0.05544	-2.89245	WITS 19	3		D6	2.68903	0.0077	-4.86654	WITS 21	4
C5	4.20161	0.05976	-2.81742	WITS 19	3		D6	2.85703	0.0089	-4.7217	WITS 21	4
C5	4.36961	0.06392	-2.75012	WITS 19	3		D6	3.02511	0.0097	-4.63563	WITS 21	4
C5	4.53761	0.06872	-2.67771	WITS 19	3		D6	3.19322	0.0108333	-4.52513	WITS 21	4
C5	4.70572	0.07308	-2.6162	WITS 19	3		D6	3.36131	0.0125	-4.38203	WITS 21	4
C5	4.87372	0.07792	-2.55207	WITS 19	3		D6	3.52939	0.014	-4.2687	WITS 21	4
C5	5.04181	0.0819	-2.50226	WITS 19	3		D6	3.6975	0.0150333	-4.19749	WITS 21	4
C5	5.20989	0.08606	-2.45271	WITS 19	3		D6	3.8655	0.0177667	-4.03043	WITS 21	4
C5	5.37792	0.09082	-2.39888	WITS 19	3		D6	4.03358	0.0204667	-3.88896	WITS 21	4
C5	5.546	0.0957	-2.34654	WITS 19	3		D6	4.20167	0.0219333	-3.81975	WITS 21	4
C5	5.714	0.09976	-2.30499	WITS 19	3		D6	4.36975	0.0242333	-3.72003	WITS 21	4
C5	5.88203	0.1045	-2.25857	WITS 19	3		D6	4.53775	0.0269667	-3.61315	WITS 21	4
C5	6.05011	0.10898	-2.21659	WITS 19	3		D6	4.70586	0.0291	-3.53702	WITS 21	4
C5	6.21819	0.11328	-2.17789	WITS 19	3		D6	4.87386	0.0312	-3.46734	WITS 21	4
C5	6.38622	0.11742	-2.142	WITS 19	3		D6	5.04194	0.0342667	-3.37358	WITS 21	4
C5	6.55431	0.12084	-2.11329	WITS 19	3		D6	5.21003	0.0368	-3.30226	WITS 21	4
C5	6.72239	0.1261	-2.07068	WITS 19	3		D6	5.37811	0.0392333	-3.23823	WITS 21	4
C5	6.89042	0.12928	-2.04577	WITS 19	3		D6	5.54622	0.0428667	-3.14966	WITS 21	4
C5	7.0585	0.13332	-2.015	WITS 19	3		D6	5.71422	0.0463	-3.07261	WITS 21	4
C5	7.22658	0.13756	-1.9837	WITS 19	3		D6	5.88231	0.0488333	-3.01934	WITS 21	4
C5	7.39461	0.14148	-1.9556	WITS 19	3		D6	6.05042	0.0524	-2.94885	WITS 21	4
C5	7.56261	0.14628	-1.92223	WITS 19	3		D6	6.21842	0.0551333	-2.898	WITS 21	4
C5	7.73069	0.15022	-1.89565	WITS 19	3		D6	6.3865	0.0585667	-2.83759	WITS 21	4
C5	7.89881	0.1539	-1.87145	WITS 19	3		D6	6.55461	0.0619333	-2.7817	WITS 21	4
C5	8.06681	0.15786	-1.84605	WITS 19	3		D6	6.72261	0.0646333	-2.73903	WITS 21	4
C5	8.23489	0.1621	-1.81954	WITS 19	3		D6	6.89069	0.0681	-2.68678	WITS 21	4
C5	8.40289	0.16588	-1.79649	WITS 19	3		D6	7.05869	0.0708	-2.6479	WITS 21	4
C5	8.571	0.17002	-1.77184	WITS 19	3		D6	7.22678	0.0743	-2.59964	WITS 21	4
C5	8.73908	0.17324	-1.75308	WITS 19	3		D6	7.39478	0.0794333	-2.53284	WITS 21	4
C5	8.90708	0.17758	-1.72833	WITS 19	3		D6	7.56289	0.0820333	-2.50063	WITS 21	4
C5	9.07519	0.18156	-1.70617	WITS 19	3		D6	7.73097	0.0842	-2.47456	WITS 21	4
C5	9.24328	0.185	-1.6874	WITS 19	3		D6	7.89897	0.0879333	-2.43118	WITS 21	4
C5	9.41139	0.18848	-1.66876	WITS 19	3		D6	8.06708	0.0910667	-2.39616	WITS 21	4
C5	9.57939	0.19286	-1.64579	WITS 19	3		D6	8.23517	0.0926667	-2.37875	WITS 21	4
C5	9.74747	0.19596	-1.62984	WITS 19	3		D6	8.40317	0.0971333	-2.33167	WITS 21	4
C5	9.91558	0.19896	-1.61465	WITS 19	3		D6	8.57128	0.100067	-2.30192	WITS 21	4
C5	10.0836	0.20204	-1.59929	WITS 19	3		D6	8.73936	0.103233	-2.27076	WITS 21	4
C5	10.2517	0.20434	-1.58797	WITS 19	3		D6	8.90744	0.1061	-2.24337	WITS 21	4
C5	10.4198	0.2077	-1.57166	WITS 19	3		D6	9.07553	0.108367	-2.22223	WITS 21	4
C5	10.5878	0.2103	-1.55922	WITS 19	3		D6	9.24356	0.111967	-2.18955	WITS 21	4
C5	10.7559	0.21292	-1.54684	WITS 19	3		D6	9.41164	0.115	-2.16282	WITS 21	4
C5	10.9239	0.2157	-1.53387	WITS 19	3		D6	9.57964	0.1183	-2.13453	WITS 21	4
C5	11.092	0.2175	-1.52556	WITS 19	3		D6	9.74772	0.120867	-2.11307	WITS 21	4
C5	11.2601	0.22206	-1.50481	WITS 19	3		D6	9.91572	0.124333	-2.08479	WITS 21	4
C5	11.4281	0.22262	-1.50229	WITS 19	3		D6	10.0838	0.126733	-2.06567	WITS 21	4
C5	11.5961	0.22492	-1.49201	WITS 19	3		D6	10.2518	0.129433	-2.04459	WITS 21	4
C5	11.7643	0.2282	-1.47753	WITS 19	3		D6	10.4199	0.134367	-2.00718	WITS 21	4
C5	11.9326	0.23002	-1.46959	WITS 19	3		D6	10.5879	0.135633	-1.9978	WITS 21	4
C5	12.1006	0.23298	-1.4568	WITS 19	3		D6	10.756	0.138333	-1.97809	WITS 21	4
C5	12.2687	0.23518	-1.4474	WITS 19	3		D6	10.9241	0.1403	-1.96397	WITS 21	4
C5	12.4367	0.2377	-1.43675	WITS 19	3		D6	11.0921	0.1428	-1.94631	WITS 21	4
C5	12.6047	0.24012	-1.42662	WITS 19	3		D6	11.2602	0.146	-1.92415	WITS 21	4
C5	12.7729	0.24258	-1.41642	WITS 19	3		D6	11.4283	0.147967	-1.91077	WITS 21	4
C5	12.9409	0.24464	-1.40797	WITS 19	3		D6	11.5964	0.1492	-1.90247	WITS 21	4
C5	13.1089	0.24746	-1.39651	WITS 19	3		D6	11.7644	0.150767	-1.89202	WITS 21	4
C5	13.2771	0.2492	-1.3895	WITS 19	3		D6	11.9328	0.153533	-1.87384	WITS 21	4
C5	13.4451	0.25088	-1.38278	WITS 19	3		D6	12.1009	0.1554	-1.86175	WITS 21	4
C5	13.6131	0.25284	-1.375	WITS 19	3		D6	12.2689	0.156533	-1.85449	WITS 21	4
C5	13.7812	0.25354	-1.37223	WITS 19	3		D6	12.4369	0.157367	-1.84918	WITS 21	4
C5	13.9492	0.25436	-1.369	WITS 19	3		D6	12.6049	0.159533	-1.8355	WITS 21	4
C5	14.1173	0.2545	-1.36845	WITS 19	3		D6	12.773	0.160433	-1.82988	WITS 21	4
C5	14.2853	0.2537	-1.3716	WITS 19	3		D6	12.9411	0.161233	-1.8249	WITS 21	4
C5	14.4534	0.25212	-1.37785	WITS 19	3		D6	13.1091	0.1625	-1.81708	WITS 21	4
C5	14.6215	0.24998	-1.38637	WITS 19	3		D6	13.2772	0.1636	-1.81033	WITS 21	4
C5	14.7895	0.24754	-1.39618	WITS 19	3		D6	13.4452	0.165067	-1.80141	WITS 21	4
C5	14.9576	0.24528	-1.40535	WITS 19	3		D6	13.6133	0.166	-1.79577	WITS 21	4
C5	15.1257	0.24306	-1.41445	WITS 19	3		D6	13.7813	0.166367	-1.79356	WITS 21	4
C5	15.2937	0.2398	-1.42795	WITS 19	3		D6	13.9494	0.168633	-1.78003	WITS 21	4
C5	15.4618	0.23818	-1.43473	WITS 19	3		D6	14.1175	0.169533	-1.77471	WITS 21	4
C5	15.6298	0.2357	-1.4452	WITS 19	3		D6	14.2856	0.1709	-1.76668	WITS 21	4
C5	15.7979	0.2332	-1.45586	WITS 19	3		D6	14.4537	0.1719	-1.76084	WITS 21	4
C5	15.9659	0.23098	-1.46542	WITS 19	3		D6	14.6217	0.173667	-1.75062	WITS 21	4
C5	16.134	0.22856	-1.47596	WITS 19	3		D6	14.7898	0.174333	-1.74679	WITS 21	4
C5	16.3021	0.22614	-1.4866	WITS 19	3		D6	14.9579	0.1755	-1.74012	WITS 21	4
C5	16.4701	0.22394	-1.49638	WITS 19	3		D6	15.126	0.177633	-1.72803	WITS 21	4
C5	16.6382	0.22168	-1.50652	WITS 19	3		D6	15.294	0.1785	-1.72317	WITS 21	4
C5	16.8062	0.21978	-1.51513	WITS 19	3		D6	15.4621	0.1803	-1.71313	WITS 21	4
C5	16.9743	0.21806	-1.52299	WITS 19	3		D6	15.6301	0.180967	-1.70944	WITS 21	4
C5	17.1423	0.21558	-1.53442	WITS 19	3		D6	15.7982	0.1819	-1.7043	WITS 21	4
C5	17.3104	0.21344	-1.5444	WITS 19	3		D6	15.9662	0.183733	-1.69427	WITS 21	4
C5	17.4784	0.21244	-1.5491	WITS 19	3		D6	16.1343	0.184733	-1.68884	WITS 21	4
C5	17.6464	0.21044	-1.55855	WITS 19	3		D6	16.3024	0.185	-1.6874	WITS 21	4
C5	17.8146	0.208	-1.57022	WITS 19	3		D6	16.4704	0.186167	-1.68111	WITS 21	4
C5	17.9826	0.206	-1.57988	WITS 19	3		D6	16.6384	0.186567	-1.67897	WITS 21	4
C5	18.1506	0.20546	-1.5825	WITS 19	3		D6	16.8065	0.1862	-1.68093	WITS 21	4
C5	18.3186	0.20278	-1.59563	WITS 19	3		D6	16.9745	0.185	-1.6874	WITS 21	4
C5	18.4868	0.20174	-1.60078	WITS 19	3		D6	17.1426	0.1845	-1.69011	WITS 21	4
C5	18.6548	0.1999	-1.60994	WITS 19	3		D6	17.3107	0.1843	-1.69119	WITS 21	4
C5	18.8229	0.199	-1.61445	WITS 19	3		D6	17.4788	0.1833	-1.69663	WITS 21	4
C5	18.9909	0.19658	-1.62669	WITS 19	3		D6	17.6469	0.181267	-1.70779	WITS 21	4
C5	19.159	0.19594	-1.62995	WITS 19	3		D6	17.8149	0.1785	-1.72317	WITS 21	4
C5	19.327	0.19484	-1.63558	WITS 19	3		D6	17.983	0.177467	-1.72897	WITS 21	4
C5	19.4951	0.19212	-1.64964	WITS 19	3		D6	18.1511	0.176933	-1.73198	WITS 21	4
C5	19.6632	0.19136	-1.6536	WITS 19	3		D6	18.3191	0.176333	-1.73538	WITS 21	4
C5	19.8312	0.19052	-1.658	WITS 19	3		D6	18.4872	0.1734	-1.75215	WITS 21	4
C5	19.9993	0.18828	-1.66983	WITS 19	3		D6	18.6553	0.172433	-1.75774	WITS 21	4
C6	0	0.00563333	-5.17905	WITS 21	3		D6	18.8233	0.169867	-1.77274	WITS 21	4
C6	0.168028	0.00653333	-5.03084	WITS 21	3		D6	18.9914	0.168033	-1.78359	WITS 21	4
C6	0.336	0.00726667	-4.92446	WITS 21	3		D6	19.1594	0.166567	-1.79236	WITS 21	4
C6	0.504083	0.00766666	-4.87087	WITS 21	3		D6	19.3275	0.165667	-1.79778	WITS 21	4
C6	0.672167	0.00866667	-4.74827	WITS 21	3		D6	19.4955	0.164	-1.80789	WITS 21	4
C6	0.84025	0.0094	-4.66705	WITS 21	3		D6	19.6636	0.1634	-1.81155	WITS 21	4
C6	1.00836	0.0102667	-4.57885	WITS 21	3		D6	19.8316	0.161767	-1.8216	WITS 21	4
C6	1.17644	0.0124333	-4.38737	WITS 21	3		D6	19.9997	0.159333	-1.83676	WITS 21	4
C6	1.34444	0.0132	-4.32754	WITS 21	3
C6	1.51256	0.0154667	-4.16907	WITS 21	3
C6	1.68064	0.0177	-4.03419	WITS 21	3
C6	1.84864	0.0203	-3.89713	WITS 21	3
C6	2.01675	0.0218	-3.82585	WITS 21	3
C6	2.18483	0.0242333	-3.72003	WITS 21	3
C6	2.35283	0.0276	-3.58994	WITS 21	3
C6	2.52092	0.0298	-3.51325	WITS 21	3
C6	2.68903	0.0331333	-3.40722	WITS 21	3
C6	2.85703	0.0363667	-3.3141	WITS 21	3
C6	3.02514	0.0392	-3.23908	WITS 21	3
C6	3.19322	0.0415667	-3.18046	WITS 21	3
C6	3.36122	0.0456	-3.08785	WITS 21	3
C6	3.52931	0.0485333	-3.0255	WITS 21	3
C6	3.69742	0.0533667	-2.93057	WITS 21	3
C6	3.86542	0.0562333	-2.87825	WITS 21	3
C6	4.0335	0.0601667	-2.81064	WITS 21	3
C6	4.20161	0.0649333	-2.73439	WITS 21	3
C6	4.36961	0.0680667	-2.68727	WITS 21	3
C6	4.53761	0.0724	-2.62555	WITS 21	3
C6	4.70572	0.0764	-2.57177	WITS 21	3
C6	4.87372	0.0807667	-2.51619	WITS 21	3
C6	5.04181	0.0841667	-2.47496	WITS 21	3
C6	5.20989	0.0892667	-2.41613	WITS 21	3
C6	5.37792	0.0934667	-2.37015	WITS 21	3
C6	5.546	0.0964667	-2.33856	WITS 21	3
C6	5.714	0.1006	-2.2966	WITS 21	3
C6	5.88203	0.105233	-2.25158	WITS 21	3
C6	6.05011	0.108433	-2.22162	WITS 21	3
C6	6.21819	0.112367	-2.18599	WITS 21	3
C6	6.38622	0.115967	-2.15445	WITS 21	3
C6	6.55431	0.119933	-2.12082	WITS 21	3
C6	6.72239	0.123067	-2.09503	WITS 21	3
C6	6.89042	0.1272	-2.06199	WITS 21	3
C6	7.0585	0.129833	-2.0415	WITS 21	3
C6	7.22658	0.134233	-2.00818	WITS 21	3
C6	7.39461	0.137367	-1.9851	WITS 21	3
C6	7.56261	0.141	-1.959	WITS 21	3
C6	7.73069	0.143667	-1.94026	WITS 21	3
C6	7.89881	0.148633	-1.90627	WITS 21	3
C6	8.06681	0.152933	-1.87775	WITS 21	3
C6	8.23489	0.1549	-1.86498	WITS 21	3
C6	8.40289	0.157867	-1.846	WITS 21	3
C6	8.571	0.160667	-1.82842	WITS 21	3
C6	8.73908	0.1646	-1.80424	WITS 21	3
C6	8.90708	0.1688	-1.77904	WITS 21	3
C6	9.07519	0.172367	-1.75813	WITS 21	3
C6	9.24328	0.1736	-1.751	WITS 21	3
C6	9.41139	0.176033	-1.73708	WITS 21	3
C6	9.57939	0.180333	-1.71295	WITS 21	3
C6	9.74747	0.1814	-1.70705	WITS 21	3
C6	9.91558	0.1854	-1.68524	WITS 21	3
C6	10.0836	0.187367	-1.67469	WITS 21	3
C6	10.2517	0.1897	-1.66231	WITS 21	3
C6	10.4198	0.1914	-1.65339	WITS 21	3
C6	10.5878	0.193833	-1.64076	WITS 21	3
C6	10.7559	0.1949	-1.63527	WITS 21	3
C6	10.9239	0.1978	-1.6205	WITS 21	3
C6	11.092	0.1991	-1.61395	WITS 21	3
C6	11.2601	0.2039	-1.59013	WITS 21	3
C6	11.4281	0.204533	-1.58702	WITS 21	3
C6	11.5961	0.206067	-1.57956	WITS 21	3
C6	11.7643	0.2102	-1.5597	WITS 21	3
C6	11.9326	0.210267	-1.55938	WITS 21	3
C6	12.1006	0.213633	-1.54349	WITS 21	3
C6	12.2687	0.214333	-1.54022	WITS 21	3
C6	12.4367	0.217967	-1.52341	WITS 21	3
C6	12.6047	0.2194	-1.51686	WITS 21	3
C6	12.7729	0.221733	-1.50628	WITS 21	3
C6	12.9409	0.221733	-1.50628	WITS 21	3
C6	13.1089	0.223167	-1.49984	WITS 21	3
C6	13.2771	0.2258	-1.48811	WITS 21	3
C6	13.4451	0.2256	-1.48899	WITS 21	3
C6	13.6131	0.225333	-1.49017	WITS 21	3
C6	13.7812	0.2257	-1.48855	WITS 21	3
C6	13.9492	0.224367	-1.49447	WITS 21	3
C6	14.1173	0.224133	-1.49551	WITS 21	3
C6	14.2853	0.2207	-1.51095	WITS 21	3
C6	14.4534	0.219867	-1.51473	WITS 21	3
C6	14.6215	0.216933	-1.52817	WITS 21	3
C6	14.7895	0.215567	-1.53449	WITS 21	3
C6	14.9576	0.212367	-1.54944	WITS 21	3
C6	15.1257	0.210867	-1.55653	WITS 21	3
C6	15.2937	0.209267	-1.56415	WITS 21	3
C6	15.4618	0.207833	-1.57102	WITS 21	3
C6	15.6298	0.204933	-1.58507	WITS 21	3
C6	15.7979	0.202967	-1.59471	WITS 21	3
C6	15.9659	0.201567	-1.60164	WITS 21	3
C6	16.134	0.200433	-1.60727	WITS 21	3
C6	16.3021	0.196833	-1.6254	WITS 21	3
C6	16.4701	0.195367	-1.63288	WITS 21	3
C6	16.6382	0.192933	-1.64541	WITS 21	3
C6	16.8062	0.191733	-1.65165	WITS 21	3
C6	16.9743	0.191333	-1.65374	WITS 21	3
C6	17.1423	0.187867	-1.67202	WITS 21	3
C6	17.3104	0.186967	-1.67682	WITS 21	3
C6	17.4784	0.187	-1.67665	WITS 21	3
C6	17.6464	0.183733	-1.69427	WITS 21	3
C6	17.8146	0.182367	-1.70174	WITS 21	3
C6	17.9826	0.182	-1.70375	WITS 21	3
C6	18.1506	0.179867	-1.71554	WITS 21	3
C6	18.3186	0.177433	-1.72916	WITS 21	3
C6	18.4868	0.1774	-1.72935	WITS 21	3
C6	18.6548	0.176	-1.73727	WITS 21	3
C6	18.8229	0.175867	-1.73803	WITS 21	3
C6	18.9909	0.1735	-1.75158	WITS 21	3
C6	19.159	0.173433	-1.75196	WITS 21	3
C6	19.327	0.1733	-1.75273	WITS 21	3
C6	19.4951	0.168333	-1.78181	WITS 21	3
C6	19.6632	0.169167	-1.77687	WITS 21	3
C6	19.8312	0.1677	-1.78558	WITS 21	3
C6	19.9993	0.165833	-1.79677	WITS 21	3
D1	0	0.002625	-5.94267	WITS 01	4
D1	0.168028	0.003575	-5.63379	WITS 01	4
D1	0.336	0.003325	-5.70629	WITS 01	4
D1	0.504083	0.003525	-5.64787	WITS 01	4
D1	0.672167	0.004375	-5.43185	WITS 01	4
D1	0.84025	0.004775	-5.34436	WITS 01	4
D1	1.00836	0.0056	-5.18499	WITS 01	4
D1	1.17644	0.00665	-5.01314	WITS 01	4
D1	1.34444	0.007725	-4.86329	WITS 01	4
D1	1.51256	0.009025	-4.70776	WITS 01	4
D1	1.68064	0.01065	-4.5422	WITS 01	4
D1	1.84864	0.012425	-4.38804	WITS 01	4
D1	2.01675	0.01395	-4.27228	WITS 01	4
D1	2.18483	0.01535	-4.17664	WITS 01	4
D1	2.35283	0.017325	-4.0556	WITS 01	4
D1	2.52092	0.0192	-3.95284	WITS 01	4
D1	2.68903	0.0215	-3.8397	WITS 01	4
D1	2.85703	0.024075	-3.72658	WITS 01	4
D1	3.02514	0.026425	-3.63344	WITS 01	4
D1	3.19322	0.0289	-3.54391	WITS 01	4
D1	3.36122	0.031875	-3.44593	WITS 01	4
D1	3.52931	0.034525	-3.36607	WITS 01	4
D1	3.69742	0.037675	-3.27876	WITS 01	4
D1	3.86542	0.040525	-3.20584	WITS 01	4
D1	4.0335	0.0435	-3.13499	WITS 01	4
D1	4.20161	0.04675	-3.06294	WITS 01	4
D1	4.36961	0.050275	-2.99025	WITS 01	4
D1	4.53761	0.05435	-2.91231	WITS 01	4
D1	4.70572	0.05785	-2.8499	WITS 01	4
D1	4.87372	0.061575	-2.7875	WITS 01	4
D1	5.04181	0.0649	-2.73491	WITS 01	4
D1	5.20989	0.0685	-2.68092	WITS 01	4
D1	5.37792	0.072475	-2.62451	WITS 01	4
D1	5.546	0.076775	-2.56688	WITS 01	4
D1	5.714	0.0798	-2.52823	WITS 01	4
D1	5.88203	0.08405	-2.47634	WITS 01	4
D1	6.05011	0.08735	-2.43783	WITS 01	4
D1	6.21819	0.09065	-2.40075	WITS 01	4
D1	6.38622	0.094725	-2.35678	WITS 01	4
D1	6.55431	0.0975	-2.3279	WITS 01	4
D1	6.72239	0.10085	-2.29412	WITS 01	4
D1	6.89042	0.104625	-2.25737	WITS 01	4
D1	7.0585	0.107825	-2.22725	WITS 01	4
D1	7.22658	0.111775	-2.19127	WITS 01	4
D1	7.39461	0.115	-2.16282	WITS 01	4
D1	7.56261	0.11845	-2.13326	WITS 01	4
D1	7.73069	0.12175	-2.10579	WITS 01	4
D1	7.89881	0.1255	-2.07545	WITS 01	4
D1	8.06681	0.1285	-2.05183	WITS 01	4
D1	8.23489	0.13195	-2.02533	WITS 01	4
D1	8.40289	0.13565	-1.99768	WITS 01	4
D1	8.571	0.139275	-1.9713	WITS 01	4
D1	8.73908	0.1423	-1.94982	WITS 01	4
D1	8.90708	0.146225	-1.92261	WITS 01	4
D1	9.07519	0.149325	-1.90163	WITS 01	4
D1	9.24328	0.152725	-1.87912	WITS 01	4
D1	9.41139	0.156225	-1.85646	WITS 01	4
D1	9.57939	0.1594	-1.83634	WITS 01	4
D1	9.74747	0.1628	-1.81523	WITS 01	4
D1	9.91558	0.165575	-1.79833	WITS 01	4
D1	10.0836	0.1685	-1.78082	WITS 01	4
D1	10.2517	0.1708	-1.76726	WITS 01	4
D1	10.4198	0.17385	-1.74956	WITS 01	4
D1	10.5878	0.17725	-1.73019	WITS 01	4
D1	10.7559	0.179825	-1.71577	WITS 01	4
D1	10.9239	0.18205	-1.70347	WITS 01	4
D1	11.092	0.184525	-1.68997	WITS 01	4
D1	11.2601	0.187075	-1.67625	WITS 01	4
D1	11.4281	0.1897	-1.66231	WITS 01	4
D1	11.5961	0.191575	-1.65248	WITS 01	4
D1	11.7643	0.1939	-1.64041	WITS 01	4
D1	11.9326	0.196175	-1.62875	WITS 01	4
D1	12.1006	0.198075	-1.61911	WITS 01	4
D1	12.2687	0.200675	-1.60607	WITS 01	4
D1	12.4367	0.2012	-1.60346	WITS 01	4
D1	12.6047	0.204175	-1.58878	WITS 01	4
D1	12.7729	0.2061	-1.57939	WITS 01	4
D1	12.9409	0.20885	-1.56614	WITS 01	4
D1	13.1089	0.211225	-1.55483	WITS 01	4
D1	13.2771	0.213425	-1.54447	WITS 01	4
D1	13.4451	0.21455	-1.53921	WITS 01	4
D1	13.6131	0.216975	-1.52797	WITS 01	4
D1	13.7812	0.218775	-1.51971	WITS 01	4
D1	13.9492	0.21995	-1.51436	WITS 01	4
D1	14.1173	0.2217	-1.50643	WITS 01	4
D1	14.2853	0.222775	-1.50159	WITS 01	4
D1	14.4534	0.223525	-1.49823	WITS 01	4
D1	14.6215	0.2252	-1.49077	WITS 01	4
D1	14.7895	0.225375	-1.48999	WITS 01	4
D1	14.9576	0.22505	-1.49143	WITS 01	4
D1	15.1257	0.22335	-1.49902	WITS 01	4
D1	15.2937	0.2219	-1.50553	WITS 01	4
D1	15.4618	0.2209	-1.51005	WITS 01	4
D1	15.6298	0.2181	-1.5228	WITS 01	4
D1	15.7979	0.216575	-1.52982	WITS 01	4
D1	15.9659	0.21405	-1.54155	WITS 01	4
D1	16.134	0.21135	-1.55424	WITS 01	4
D1	16.3021	0.20985	-1.56136	WITS 01	4
D1	16.4701	0.20835	-1.56854	WITS 01	4
D1	16.6382	0.206275	-1.57855	WITS 01	4
D1	16.8062	0.203575	-1.59172	WITS 01	4
D1	16.9743	0.202125	-1.59887	WITS 01	4
D1	17.1423	0.199275	-1.61307	WITS 01	4
D1	17.3104	0.1983	-1.61797	WITS 01	4
D1	17.4784	0.1961	-1.62913	WITS 01	4
D1	17.6464	0.194025	-1.63977	WITS 01	4
D1	17.8146	0.1933	-1.64351	WITS 01	4
D1	17.9826	0.19125	-1.65417	WITS 01	4
D1	18.1506	0.1896	-1.66284	WITS 01	4
D1	18.3186	0.18735	-1.67478	WITS 01	4
D1	18.4868	0.18645	-1.67959	WITS 01	4
D1	18.6548	0.183925	-1.69323	WITS 01	4
D1	18.8229	0.183175	-1.69731	WITS 01	4
D1	18.9909	0.181025	-1.70912	WITS 01	4
D1	19.159	0.1803	-1.71313	WITS 01	4
D1	19.327	0.179	-1.72037	WITS 01	4
D1	19.4951	0.1778	-1.7271	WITS 01	4
D1	19.6632	0.17595	-1.73756	WITS 01	4
D1	19.8312	0.17505	-1.74268	WITS 01	4
D1	19.9993	0.1732	-1.75331	WITS 01	4
D2	0	0.0044	-5.42615	WITS 02	4
D2	0.168028	0.00568	-5.1708	WITS 02	4
D2	0.336	0.0052	-5.2591	WITS 02	4
D2	0.504083	0.00546	-5.21031	WITS 02	4
D2	0.672167	0.00632	-5.06404	WITS 02	4
D2	0.84025	0.0067	-5.00565	WITS 02	4
D2	1.00836	0.00778	-4.8562	WITS 02	4
D2	1.17644	0.00906	-4.70389	WITS 02	4
D2	1.34444	0.01022	-4.58341	WITS 02	4
D2	1.51256	0.01156	-4.4602	WITS 02	4
D2	1.68064	0.01318	-4.32905	WITS 02	4
D2	1.84864	0.01502	-4.19837	WITS 02	4
D2	2.01675	0.01664	-4.09595	WITS 02	4
D2	2.18483	0.01812	-4.01074	WITS 02	4
D2	2.35283	0.0206	-3.88246	WITS 02	4
D2	2.52092	0.02216	-3.80947	WITS 02	4
D2	2.68903	0.02488	-3.69369	WITS 02	4
D2	2.85703	0.027	-3.61192	WITS 02	4
D2	3.02514	0.0295	-3.52337	WITS 02	4
D2	3.19322	0.03188	-3.44578	WITS 02	4
D2	3.36122	0.0347	-3.36102	WITS 02	4
D2	3.52931	0.03824	-3.26387	WITS 02	4
D2	3.69742	0.04138	-3.18496	WITS 02	4
D2	3.86542	0.04378	-3.12858	WITS 02	4
D2	4.0335	0.0476	-3.04492	WITS 02	4
D2	4.20161	0.04974	-3.00095	WITS 02	4
D2	4.36961	0.0543	-2.91323	WITS 02	4
D2	4.53761	0.05776	-2.85146	WITS 02	4
D2	4.70572	0.06196	-2.78127	WITS 02	4
D2	4.87372	0.06584	-2.72053	WITS 02	4
D2	5.04181	0.06898	-2.67394	WITS 02	4
D2	5.20989	0.07252	-2.62389	WITS 02	4
D2	5.37792	0.07658	-2.56942	WITS 02	4
D2	5.546	0.08136	-2.50887	WITS 02	4
D2	5.714	0.08508	-2.46416	WITS 02	4
D2	5.88203	0.08946	-2.41396	WITS 02	4
D2	6.05011	0.0933	-2.37194	WITS 02	4
D2	6.21819	0.09588	-2.34466	WITS 02	4
D2	6.38622	0.09958	-2.30679	WITS 02	4
D2	6.55431	0.10382	-2.2651	WITS 02	4
D2	6.72239	0.10676	-2.23717	WITS 02	4
D2	6.89042	0.1113	-2.19553	WITS 02	4
D2	7.0585	0.11438	-2.16823	WITS 02	4
D2	7.22658	0.11734	-2.14268	WITS 02	4
D2	7.39461	0.12188	-2.10472	WITS 02	4
D2	7.56261	0.1243	-2.08506	WITS 02	4
D2	7.73069	0.12936	-2.04516	WITS 02	4
D2	7.89881	0.13276	-2.01921	WITS 02	4
D2	8.06681	0.13672	-1.98982	WITS 02	4
D2	8.23489	0.13972	-1.96811	WITS 02	4
D2	8.40289	0.1416	-1.95475	WITS 02	4
D2	8.571	0.14406	-1.93753	WITS 02	4
D2	8.73908	0.14824	-1.90892	WITS 02	4
D2	8.90708	0.15336	-1.87497	WITS 02	4
D2	9.07519	0.15568	-1.85995	WITS 02	4
D2	9.24328	0.1608	-1.82759	WITS 02	4
D2	9.41139	0.16316	-1.81302	WITS 02	4
D2	9.57939	0.16608	-1.79529	WITS 02	4
D2	9.74747	0.1678	-1.78498	WITS 02	4
D2	9.91558	0.17034	-1.76996	WITS 02	4
D2	10.0836	0.1726	-1.75678	WITS 02	4
D2	10.2517	0.17822	-1.72474	WITS 02	4
D2	10.4198	0.17892	-1.72082	WITS 02	4
D2	10.5878	0.18368	-1.69456	WITS 02	4
D2	10.7559	0.18454	-1.68989	WITS 02	4
D2	10.9239	0.18802	-1.67121	WITS 02	4
D2	11.092	0.18966	-1.66252	WITS 02	4
D2	11.2601	0.1914	-1.65339	WITS 02	4
D2	11.4281	0.19542	-1.6326	WITS 02	4
D2	11.5961	0.19524	-1.63353	WITS 02	4
D2	11.7643	0.19604	-1.62944	WITS 02	4
D2	11.9326	0.19944	-1.61224	WITS 02	4
D2	12.1006	0.2019	-1.59998	WITS 02	4
D2	12.2687	0.20554	-1.58211	WITS 02	4
D2	12.4367	0.2058	-1.58085	WITS 02	4
D2	12.6047	0.20574	-1.58114	WITS 02	4
D2	12.7729	0.21074	-1.55713	WITS 02	4
D2	12.9409	0.21122	-1.55486	WITS 02	4
D2	13.1089	0.21332	-1.54496	WITS 02	4
D2	13.2771	0.21564	-1.53414	WITS 02	4
D2	13.4451	0.21716	-1.52712	WITS 02	4
D2	13.6131	0.22082	-1.51041	WITS 02	4
D2	13.7812	0.22114	-1.50896	WITS 02	4
D2	13.9492	0.22322	-1.4996	WITS 02	4
D2	14.1173	0.22478	-1.49263	WITS 02	4
D2	14.2853	0.225	-1.49165	WITS 02	4
D2	14.4534	0.22484	-1.49237	WITS 02	4
D2	14.6215	0.22648	-1.4851	WITS 02	4
D2	14.7895	0.22422	-1.49513	WITS 02	4
D2	14.9576	0.22502	-1.49157	WITS 02	4
D2	15.1257	0.22308	-1.50022	WITS 02	4
D2	15.2937	0.22294	-1.50085	WITS 02	4
D2	15.4618	0.22038	-1.5124	WITS 02	4
D2	15.6298	0.2175	-1.52556	WITS 02	4
D2	15.7979	0.21606	-1.5322	WITS 02	4
D2	15.9659	0.21634	-1.5309	WITS 02	4
D2	16.134	0.21148	-1.55362	WITS 02	4
D2	16.3021	0.21138	-1.5541	WITS 02	4
D2	16.4701	0.20854	-1.56762	WITS 02	4
D2	16.6382	0.20742	-1.57301	WITS 02	4
D2	16.8062	0.20592	-1.58027	WITS 02	4
D2	16.9743	0.20386	-1.59032	WITS 02	4
D2	17.1423	0.20204	-1.59929	WITS 02	4
D2	17.3104	0.20004	-1.60924	WITS 02	4
D2	17.4784	0.19874	-1.61576	WITS 02	4
D2	17.6464	0.19676	-1.62577	WITS 02	4
D2	17.8146	0.19338	-1.6431	WITS 02	4
D2	17.9826	0.19318	-1.64413	WITS 02	4
D2	18.1506	0.19076	-1.65674	WITS 02	4
D2	18.3186	0.19016	-1.65989	WITS 02	4
D2	18.4868	0.18856	-1.66834	WITS 02	4
D2	18.6548	0.1885	-1.66866	WITS 02	4
D2	18.8229	0.185	-1.6874	WITS 02	4
D2	18.9909	0.18544	-1.68502	WITS 02	4
D2	19.159	0.18392	-1.69325	WITS 02	4
D2	19.327	0.18226	-1.70232	WITS 02	4
D2	19.4951	0.18078	-1.71047	WITS 02	4
D2	19.6632	0.17868	-1.72216	WITS 02	4
D2	19.8312	0.17786	-1.72676	WITS 02	4
D2	19.9993	0.1766	-1.73387	WITS 02	4
D3	0	0.0047	-5.36019	WITS 11	4
D3	0.168028	0.005825	-5.1456	WITS 11	4
D3	0.336	0.005375	-5.226	WITS 11	4
D3	0.504083	0.00595	-5.12436	WITS 11	4
D3	0.672167	0.006525	-5.03211	WITS 11	4
D3	0.84025	0.007325	-4.91646	WITS 11	4
D3	1.00836	0.008175	-4.80667	WITS 11	4
D3	1.17644	0.0096	-4.64599	WITS 11	4
D3	1.34444	0.0109	-4.51899	WITS 11	4
D3	1.51256	0.011825	-4.43754	WITS 11	4
D3	1.68064	0.013675	-4.29219	WITS 11	4
D3	1.84864	0.0156	-4.16048	WITS 11	4
D3	2.01675	0.017675	-4.0356	WITS 11	4
D3	2.18483	0.01905	-3.96069	WITS 11	4
D3	2.35283	0.021425	-3.8432	WITS 11	4
D3	2.52092	0.023725	-3.74123	WITS 11	4
D3	2.68903	0.02595	-3.65158	WITS 11	4
D3	2.85703	0.02855	-3.5561	WITS 11	4
D3	3.02514	0.030925	-3.47619	WITS 11	4
D3	3.19322	0.0333	-3.4022	WITS 11	4
D3	3.36122	0.036775	-3.30294	WITS 11	4
D3	3.52931	0.0398	-3.22389	WITS 11	4
D3	3.69742	0.042425	-3.16002	WITS 11	4
D3	3.86542	0.046175	-3.07532	WITS 11	4
D3	4.0335	0.0493	-3.00983	WITS 11	4
D3	4.20161	0.0523	-2.95076	WITS 11	4
D3	4.36961	0.056225	-2.87839	WITS 11	4
D3	4.53761	0.060025	-2.81299	WITS 11	4
D3	4.70572	0.06385	-2.75122	WITS 11	4
D3	4.87372	0.067575	-2.69452	WITS 11	4
D3	5.04181	0.07055	-2.65143	WITS 11	4
D3	5.20989	0.075075	-2.58927	WITS 11	4
D3	5.37792	0.078	-2.55105	WITS 11	4
D3	5.546	0.082675	-2.49284	WITS 11	4
D3	5.714	0.0857	-2.4569	WITS 11	4
D3	5.88203	0.08945	-2.41408	WITS 11	4
D3	6.05011	0.0935	-2.36979	WITS 11	4
D3	6.21819	0.096875	-2.33433	WITS 11	4
D3	6.38622	0.099675	-2.30584	WITS 11	4
D3	6.55431	0.10305	-2.27254	WITS 11	4
D3	6.72239	0.1065	-2.23961	WITS 11	4
D3	6.89042	0.110375	-2.20387	WITS 11	4
D3	7.0585	0.1131	-2.17948	WITS 11	4
D3	7.22658	0.11625	-2.15201	WITS 11	4
D3	7.39461	0.120325	-2.11756	WITS 11	4
D3	7.56261	0.1232	-2.09395	WITS 11	4
D3	7.73069	0.1282	-2.05416	WITS 11	4
D3	7.89881	0.129925	-2.0408	WITS 11	4
D3	8.06681	0.132475	-2.02136	WITS 11	4
D3	8.23489	0.135675	-1.99749	WITS 11	4
D3	8.40289	0.140625	-1.96166	WITS 11	4
D3	8.571	0.14495	-1.93137	WITS 11	4
D3	8.73908	0.147975	-1.91071	WITS 11	4
D3	8.90708	0.1505	-1.89379	WITS 11	4
D3	9.07519	0.155125	-1.86352	WITS 11	4
D3	9.24328	0.156975	-1.85167	WITS 11	4
D3	9.41139	0.15865	-1.84105	WITS 11	4
D3	9.57939	0.16235	-1.818	WITS 11	4
D3	9.74747	0.1651	-1.8012	WITS 11	4
D3	9.91558	0.168	-1.78379	WITS 11	4
D3	10.0836	0.1733	-1.75273	WITS 11	4
D3	10.2517	0.173875	-1.74942	WITS 11	4
D3	10.4198	0.175975	-1.73741	WITS 11	4
D3	10.5878	0.177825	-1.72696	WITS 11	4
D3	10.7559	0.181125	-1.70857	WITS 11	4
D3	10.9239	0.183575	-1.69513	WITS 11	4
D3	11.092	0.185975	-1.68214	WITS 11	4
D3	11.2601	0.188925	-1.66641	WITS 11	4
D3	11.4281	0.189775	-1.66192	WITS 11	4
D3	11.5961	0.191675	-1.65195	WITS 11	4
D3	11.7643	0.193775	-1.64106	WITS 11	4
D3	11.9326	0.195475	-1.63232	WITS 11	4
D3	12.1006	0.19795	-1.61974	WITS 11	4
D3	12.2687	0.201525	-1.60184	WITS 11	4
D3	12.4367	0.2006	-1.60644	WITS 11	4
D3	12.6047	0.203525	-1.59197	WITS 11	4
D3	12.7729	0.205925	-1.58024	WITS 11	4
D3	12.9409	0.206075	-1.57952	WITS 11	4
D3	13.1089	0.20885	-1.56614	WITS 11	4
D3	13.2771	0.2129	-1.54693	WITS 11	4
D3	13.4451	0.212525	-1.5487	WITS 11	4
D3	13.6131	0.215475	-1.53491	WITS 11	4
D3	13.7812	0.2163	-1.53109	WITS 11	4
D3	13.9492	0.2138	-1.54271	WITS 11	4
D3	14.1173	0.215825	-1.53329	WITS 11	4
D3	14.2853	0.216775	-1.5289	WITS 11	4
D3	14.4534	0.2143	-1.54038	WITS 11	4
D3	14.6215	0.210775	-1.55696	WITS 11	4
D3	14.7895	0.20855	-1.56758	WITS 11	4
D3	14.9576	0.209925	-1.561	WITS 11	4
D3	15.1257	0.20725	-1.57383	WITS 11	4
D3	15.2937	0.206075	-1.57952	WITS 11	4
D3	15.4618	0.20225	-1.59825	WITS 11	4
D3	15.6298	0.2002	-1.60844	WITS 11	4
D3	15.7979	0.19725	-1.62328	WITS 11	4
D3	15.9659	0.19755	-1.62176	WITS 11	4
D3	16.134	0.194175	-1.639	WITS 11	4
D3	16.3021	0.192625	-1.64701	WITS 11	4
D3	16.4701	0.189975	-1.66086	WITS 11	4
D3	16.6382	0.1886	-1.66813	WITS 11	4
D3	16.8062	0.1876	-1.67344	WITS 11	4
D3	16.9743	0.1835	-1.69554	WITS 11	4
D3	17.1423	0.18385	-1.69364	WITS 11	4
D3	17.3104	0.1819	-1.7043	WITS 11	4
D3	17.4784	0.179675	-1.71661	WITS 11	4
D3	17.6464	0.178125	-1.72527	WITS 11	4
D3	17.8146	0.1769	-1.73217	WITS 11	4
D3	17.9826	0.17565	-1.73926	WITS 11	4
D3	18.1506	0.1748	-1.74411	WITS 11	4
D3	18.3186	0.171725	-1.76186	WITS 11	4
D3	18.4868	0.170875	-1.76682	WITS 11	4
D3	18.6548	0.16975	-1.77343	WITS 11	4
D3	18.8229	0.16835	-1.78171	WITS 11	4
D3	18.9909	0.168225	-1.78245	WITS 11	4
D3	19.159	0.165675	-1.79773	WITS 11	4
D3	19.327	0.16575	-1.79727	WITS 11	4
D3	19.4951	0.162825	-1.81508	WITS 11	4
D3	19.6632	0.16235	-1.818	WITS 11	4
D3	19.8312	0.1613	-1.82449	WITS 11	4
D3	19.9993	0.159375	-1.8365	WITS 11	4
D4	0	0.0047	-5.36019	WITS 17	4
D4	0.168028	0.00543334	-5.2152	WITS 17	4
D4	0.336	0.0059	-5.1328	WITS 17	4
D4	0.504083	0.00616667	-5.0886	WITS 17	4
D4	0.672167	0.00686667	-4.98108	WITS 17	4
D4	0.84025	0.0076	-4.87961	WITS 17	4
D4	1.00836	0.00823333	-4.79956	WITS 17	4
D4	1.17644	0.0097	-4.63563	WITS 17	4
D4	1.34444	0.0107667	-4.5313	WITS 17	4
D4	1.51256	0.0115333	-4.46251	WITS 17	4
D4	1.68064	0.0131	-4.33514	WITS 17	4
D4	1.84864	0.0150667	-4.19527	WITS 17	4
D4	2.01675	0.0167667	-4.08836	WITS 17	4
D4	2.18483	0.0180667	-4.01369	WITS 17	4
D4	2.35283	0.0203667	-3.89386	WITS 17	4
D4	2.52092	0.0223	-3.80317	WITS 17	4
D4	2.68903	0.0246333	-3.70365	WITS 17	4
D4	2.85703	0.0277	-3.58632	WITS 17	4
D4	3.02514	0.0299	-3.5099	WITS 17	4
D4	3.19322	0.0325667	-3.42447	WITS 17	4
D4	3.36122	0.0356333	-3.33447	WITS 17	4
D4	3.52931	0.0381667	-3.26579	WITS 17	4
D4	3.69742	0.0411333	-3.19094	WITS 17	4
D4	3.86542	0.0441333	-3.12054	WITS 17	4
D4	4.0335	0.0476667	-3.04352	WITS 17	4
D4	4.20161	0.0509333	-2.97724	WITS 17	4
D4	4.36961	0.0547	-2.90589	WITS 17	4
D4	4.53761	0.0584667	-2.8393	WITS 17	4
D4	4.70572	0.0614667	-2.78926	WITS 17	4
D4	4.87372	0.0659333	-2.71911	WITS 17	4
D4	5.04181	0.0706333	-2.65025	WITS 17	4
D4	5.20989	0.0745	-2.59696	WITS 17	4
D4	5.37792	0.0783	-2.54721	WITS 17	4
D4	5.546	0.0809667	-2.51372	WITS 17	4
D4	5.714	0.0854667	-2.45963	WITS 17	4
D4	5.88203	0.0890333	-2.41874	WITS 17	4
D4	6.05011	0.0931333	-2.37372	WITS 17	4
D4	6.21819	0.0970333	-2.3327	WITS 17	4
D4	6.38622	0.1005	-2.2976	WITS 17	4
D4	6.55431	0.103567	-2.26754	WITS 17	4
D4	6.72239	0.107833	-2.22717	WITS 17	4
D4	6.89042	0.111367	-2.19493	WITS 17	4
D4	7.0585	0.1147	-2.16544	WITS 17	4
D4	7.22658	0.1183	-2.13453	WITS 17	4
D4	7.39461	0.120567	-2.11555	WITS 17	4
D4	7.56261	0.1264	-2.0683	WITS 17	4
D4	7.73069	0.1277	-2.05807	WITS 17	4
D4	7.89881	0.132167	-2.02369	WITS 17	4
D4	8.06681	0.136033	-1.99486	WITS 17	4
D4	8.23489	0.138633	-1.97592	WITS 17	4
D4	8.40289	0.1426	-1.94771	WITS 17	4
D4	8.571	0.1433	-1.94281	WITS 17	4
D4	8.73908	0.1508	-1.8918	WITS 17	4
D4	8.90708	0.1529	-1.87797	WITS 17	4
D4	9.07519	0.1547	-1.86627	WITS 17	4
D4	9.24328	0.1588	-1.84011	WITS 17	4
D4	9.41139	0.162767	-1.81544	WITS 17	4
D4	9.57939	0.164533	-1.80464	WITS 17	4
D4	9.74747	0.1685	-1.78082	WITS 17	4
D4	9.91558	0.1709	-1.76668	WITS 17	4
D4	10.0836	0.172833	-1.75543	WITS 17	4
D4	10.2517	0.175867	-1.73803	WITS 17	4
D4	10.4198	0.178433	-1.72354	WITS 17	4
D4	10.5878	0.1808	-1.71036	WITS 17	4
D4	10.7559	0.184233	-1.69155	WITS 17	4
D4	10.9239	0.1865	-1.67932	WITS 17	4
D4	11.092	0.1884	-1.66919	WITS 17	4
D4	11.2601	0.1922	-1.64922	WITS 17	4
D4	11.4281	0.193067	-1.64472	WITS 17	4
D4	11.5961	0.194933	-1.6351	WITS 17	4
D4	11.7643	0.1996	-1.61144	WITS 17	4
D4	11.9326	0.198433	-1.6173	WITS 17	4
D4	12.1006	0.2011	-1.60395	WITS 17	4
D4	12.2687	0.204233	-1.58849	WITS 17	4
D4	12.4367	0.2068	-1.576	WITS 17	4
D4	12.6047	0.2096	-1.56255	WITS 17	4
D4	12.7729	0.2107	-1.55732	WITS 17	4
D4	12.9409	0.213367	-1.54474	WITS 17	4
D4	13.1089	0.2133	-1.54506	WITS 17	4
D4	13.2771	0.2159	-1.53294	WITS 17	4
D4	13.4451	0.2171	-1.5274	WITS 17	4
D4	13.6131	0.218933	-1.51899	WITS 17	4
D4	13.7812	0.2198	-1.51504	WITS 17	4
D4	13.9492	0.2212	-1.50869	WITS 17	4
D4	14.1173	0.219567	-1.5161	WITS 17	4
D4	14.2853	0.220633	-1.51125	WITS 17	4
D4	14.4534	0.218567	-1.52066	WITS 17	4
D4	14.6215	0.217733	-1.52448	WITS 17	4
D4	14.7895	0.2158	-1.5334	WITS 17	4
D4	14.9576	0.213633	-1.54349	WITS 17	4
D4	15.1257	0.210467	-1.55843	WITS 17	4
D4	15.2937	0.209633	-1.5624	WITS 17	4
D4	15.4618	0.208833	-1.56622	WITS 17	4
D4	15.6298	0.203867	-1.59029	WITS 17	4
D4	15.7979	0.2024	-1.59751	WITS 17	4
D4	15.9659	0.2012	-1.60346	WITS 17	4
D4	16.134	0.1992	-1.61345	WITS 17	4
D4	16.3021	0.196533	-1.62692	WITS 17	4
D4	16.4701	0.194967	-1.63493	WITS 17	4
D4	16.6382	0.193767	-1.6411	WITS 17	4
D4	16.8062	0.190333	-1.65898	WITS 17	4
D4	16.9743	0.190567	-1.65775	WITS 17	4
D4	17.1423	0.1877	-1.67291	WITS 17	4
D4	17.3104	0.184333	-1.69101	WITS 17	4
D4	17.4784	0.185167	-1.6865	WITS 17	4
D4	17.6464	0.181867	-1.70448	WITS 17	4
D4	17.8146	0.181967	-1.70393	WITS 17	4
D4	17.9826	0.1799	-1.71535	WITS 17	4
D4	18.1506	0.1802	-1.71369	WITS 17	4
D4	18.3186	0.175	-1.74297	WITS 17	4
D4	18.4868	0.176367	-1.73519	WITS 17	4
D4	18.6548	0.175033	-1.74278	WITS 17	4
D4	18.8229	0.1734	-1.75215	WITS 17	4
D4	18.9909	0.172	-1.76026	WITS 17	4
D4	19.159	0.171367	-1.76395	WITS 17	4
D4	19.327	0.1702	-1.77078	WITS 17	4
D4	19.4951	0.1671	-1.78916	WITS 17	4
D4	19.6632	0.1671	-1.78916	WITS 17	4
D4	19.8312	0.165967	-1.79597	WITS 17	4
D4	19.9993	0.165033	-1.80161	WITS 17	4
D5	0	0.0042	-5.47267	WITS 19	4
D5	0.168028	0.0063	-5.06721	WITS 19	4
D5	0.336	0.005225	-5.2543	WITS 19	4
D5	0.504083	0.005475	-5.20756	WITS 19	4
D5	0.672167	0.005975	-5.12017	WITS 19	4
D5	0.84025	0.006525	-5.03211	WITS 19	4
D5	1.00836	0.007475	-4.89619	WITS 19	4
D5	1.17644	0.00905	-4.70499	WITS 19	4
D5	1.34444	0.010075	-4.5977	WITS 19	4
D5	1.51256	0.011625	-4.4546	WITS 19	4
D5	1.68064	0.01315	-4.33133	WITS 19	4
D5	1.84864	0.015125	-4.19141	WITS 19	4
D5	2.01675	0.01715	-4.06576	WITS 19	4
D5	2.18483	0.0187	-3.97923	WITS 19	4
D5	2.35283	0.02085	-3.8704	WITS 19	4
D5	2.52092	0.0227	-3.78539	WITS 19	4
D5	2.68903	0.025175	-3.6819	WITS 19	4
D5	2.85703	0.0278	-3.58272	WITS 19	4
D5	3.02514	0.030575	-3.48757	WITS 19	4
D5	3.19322	0.033025	-3.41049	WITS 19	4
D5	3.36122	0.035925	-3.32632	WITS 19	4
D5	3.52931	0.039125	-3.24099	WITS 19	4
D5	3.69742	0.04245	-3.15943	WITS 19	4
D5	3.86542	0.0448	-3.10555	WITS 19	4
D5	4.0335	0.04855	-3.02516	WITS 19	4
D5	4.20161	0.05245	-2.9479	WITS 19	4
D5	4.36961	0.055325	-2.89453	WITS 19	4
D5	4.53761	0.059175	-2.82726	WITS 19	4
D5	4.70572	0.062775	-2.7682	WITS 19	4
D5	4.87372	0.0666	-2.70905	WITS 19	4
D5	5.04181	0.06995	-2.65997	WITS 19	4
D5	5.20989	0.074125	-2.602	WITS 19	4
D5	5.37792	0.077975	-2.55137	WITS 19	4
D5	5.546	0.0815	-2.50715	WITS 19	4
D5	5.714	0.0851	-2.46393	WITS 19	4
D5	5.88203	0.089225	-2.41659	WITS 19	4
D5	6.05011	0.093325	-2.37167	WITS 19	4
D5	6.21819	0.096775	-2.33537	WITS 19	4
D5	6.38622	0.0997	-2.30559	WITS 19	4
D5	6.55431	0.104125	-2.26216	WITS 19	4
D5	6.72239	0.106525	-2.23938	WITS 19	4
D5	6.89042	0.1099	-2.20818	WITS 19	4
D5	7.0585	0.1128	-2.18214	WITS 19	4
D5	7.22658	0.1173	-2.14302	WITS 19	4
D5	7.39461	0.119825	-2.12172	WITS 19	4
D5	7.56261	0.123925	-2.08808	WITS 19	4
D5	7.73069	0.126925	-2.06416	WITS 19	4
D5	7.89881	0.131575	-2.02818	WITS 19	4
D5	8.06681	0.134025	-2.00973	WITS 19	4
D5	8.23489	0.136625	-1.99052	WITS 19	4
D5	8.40289	0.140425	-1.96308	WITS 19	4
D5	8.571	0.144775	-1.93257	WITS 19	4
D5	8.73908	0.147425	-1.91444	WITS 19	4
D5	8.90708	0.15055	-1.89346	WITS 19	4
D5	9.07519	0.1542	-1.8695	WITS 19	4
D5	9.24328	0.157125	-1.85071	WITS 19	4
D5	9.41139	0.15975	-1.83415	WITS 19	4
D5	9.57939	0.163475	-1.8111	WITS 19	4
D5	9.74747	0.166	-1.79577	WITS 19	4
D5	9.91558	0.168825	-1.77889	WITS 19	4
D5	10.0836	0.171275	-1.76448	WITS 19	4
D5	10.2517	0.17465	-1.74497	WITS 19	4
D5	10.4198	0.176375	-1.73514	WITS 19	4
D5	10.5878	0.179075	-1.71995	WITS 19	4
D5	10.7559	0.18125	-1.70788	WITS 19	4
D5	10.9239	0.183025	-1.69813	WITS 19	4
D5	11.092	0.185075	-1.68699	WITS 19	4
D5	11.2601	0.18825	-1.66998	WITS 19	4
D5	11.4281	0.189275	-1.66455	WITS 19	4
D5	11.5961	0.1917	-1.65182	WITS 19	4
D5	11.7643	0.19515	-1.63399	WITS 19	4
D5	11.9326	0.1954	-1.63271	WITS 19	4
D5	12.1006	0.19725	-1.62328	WITS 19	4
D5	12.2687	0.19985	-1.61019	WITS 19	4
D5	12.4367	0.2032	-1.59356	WITS 19	4
D5	12.6047	0.203525	-1.59197	WITS 19	4
D5	12.7729	0.205875	-1.58049	WITS 19	4
D5	12.9409	0.207075	-1.57467	WITS 19	4
[truncated: 162 more rows]

## Sheet: Fig1-Supp1
	Observed relative abundance by qPCR
Expected abundance (log10)/ Tag	WITS 01	WITS 02	WITS 11	WITS 17	WITS 19	WITS 21
-4	-4.44209	-4.86272	-4.28848	-4.23773	-4.18933	-4.18715
-3	-4.00227	-3.45556	-3.45474	-3.12555	-3.12019	-3.58889
-2	-2.58894	-2.21851	-2.19734	-2.19765	-2.59613	-2.30814
-1	-1.36987	-1.36178	-1.76596	-1.79251	-1.34502	-1.18222
0	-0.38378	-0.0929514	-0.375249	-0.279475	-0.0537117	-0.271328

## Sheet: Fig1-Supp2
Fig.1-Suppl.2 B and C: In vitro competition of tagged strains
Sample	Target	Source	Strain	Time	Ctm	Experiment	Microbiota	Comp Index	rel.CFU.g	fold_increase
DH20_016_1	WITS 01	Culture	WT	ON	13.9089	DH_20_018	Culture	1.00704	4.59605e+08	512.931
DH20_016_1	WITS 02	Culture	WT	ON	15.8691	DH_20_018	Culture	1.00704	1.18116e+08	173.587
DH20_016_1	WITS 11	Culture	WT	ON	14.5611	DH_20_018	Culture	1.00704	2.92454e+08	368.4
DH20_016_1	WITS 17	Culture	WT	ON	15.3367	DH_20_018	Culture	1.00704	1.70833e+08	154.579
DH20_016_1	WITS 19	Culture	WT	ON	14.4957	DH_20_018	Culture	1.00704	3.06022e+08	378.699
DH20_016_1	WITS 21	Culture	WT	ON	14.7703	DH_20_018	Culture	1.00704	2.5297e+08	364.836
DH20_016_2	WITS 01	Culture	WT	ON	13.5913	DH_20_018	Culture	1.00704	2.16194e+08	241.278
DH20_016_2	WITS 02	Culture	WT	ON	16.2489	DH_20_018	Culture	1.00704	3.42623e+07	50.3529
DH20_016_2	WITS 11	Culture	WT	ON	14.5767	DH_20_018	Culture	1.00704	1.09195e+08	137.551
DH20_016_2	WITS 17	Culture	WT	ON	15.1203	DH_20_018	Culture	1.00704	7.49136e+07	67.7859
DH20_016_2	WITS 19	Culture	WT	ON	14.5053	DH_20_018	Culture	1.00704	1.14738e+08	141.988
DH20_016_2	WITS 21	Culture	WT	ON	14.8445	DH_20_018	Culture	1.00704	9.06967e+07	130.804
DH20_016_3	WITS 01	Culture	WT	ON	13.9668	DH_20_018	Culture	1.00704	2.51265e+08	280.418
DH20_016_3	WITS 02	Culture	WT	ON	15.8106	DH_20_018	Culture	1.00704	6.99992e+07	102.873
DH20_016_3	WITS 11	Culture	WT	ON	14.6826	DH_20_018	Culture	1.00704	1.52981e+08	192.708
DH20_016_3	WITS 17	Culture	WT	ON	15.2539	DH_20_018	Culture	1.00704	1.02956e+08	93.1606
DH20_016_3	WITS 19	Culture	WT	ON	14.0583	DH_20_018	Culture	1.00704	2.35821e+08	291.826
DH20_016_3	WITS 21	Culture	WT	ON	14.7404	DH_20_018	Culture	1.00704	1.46978e+08	211.973
DH20_018_1	WITS 01	Culture	Acapsular	ON	14.718	DH_20_018	Culture	1.00704	4.88121e+08	544.755
DH20_018_1	WITS 02	Culture	Acapsular	ON	14.172	DH_20_018	Culture	1.00704	7.12672e+08	1047.36
DH20_018_1	WITS 11	Culture	Acapsular	ON	14.6295	DH_20_018	Culture	1.00704	5.19001e+08	653.777
DH20_018_1	WITS 17	Culture	Acapsular	ON	13.91	DH_20_018	Culture	1.00704	8.54593e+08	773.282
DH20_018_1	WITS 19	Culture	Acapsular	ON	14.835	DH_20_018	Culture	1.00704	4.50097e+08	556.992
DH20_018_1	WITS 21	Culture	Acapsular	ON	15.0215	DH_20_018	Culture	1.00704	3.95516e+08	570.417
DH20_018_2	WITS 01	Culture	Acapsular	ON	14.6115	DH_20_018	Culture	1.00704	5.09746e+08	568.889
DH20_018_2	WITS 02	Culture	Acapsular	ON	14.274	DH_20_018	Culture	1.00704	6.44097e+08	946.582
DH20_018_2	WITS 11	Culture	Acapsular	ON	14.817	DH_20_018	Culture	1.00704	4.42071e+08	556.869
DH20_018_2	WITS 17	Culture	Acapsular	ON	14.267	DH_20_018	Culture	1.00704	6.4723e+08	585.649
DH20_018_2	WITS 19	Culture	Acapsular	ON	15.256	DH_20_018	Culture	1.00704	3.26092e+08	403.536
DH20_018_2	WITS 21	Culture	Acapsular	ON	15.1925	DH_20_018	Culture	1.00704	3.40765e+08	491.455
DH20_018_3	WITS 01	Culture	Acapsular	ON	14.2475	DH_20_018	Culture	1.00704	3.96019e+08	441.967
DH20_018_3	WITS 02	Culture	Acapsular	ON	13.8695	DH_20_018	Culture	1.00704	5.14642e+08	756.332
DH20_018_3	WITS 11	Culture	Acapsular	ON	14.689	DH_20_018	Culture	1.00704	2.91616e+08	367.344
DH20_018_3	WITS 17	Culture	Acapsular	ON	13.6845	DH_20_018	Culture	1.00704	5.85054e+08	529.389
DH20_018_3	WITS 19	Culture	Acapsular	ON	14.647	DH_20_018	Culture	1.00704	3.0023e+08	371.532
DH20_018_3	WITS 21	Culture	Acapsular	ON	14.5895	DH_20_018	Culture	1.00704	3.12438e+08	450.601
Inoc	WITS 01	Culture	Acapsular	Inoc	14.201	DH_20_018	Culture	0.810138	1.04684e+06	1.1683
Inoc	WITS 01	Culture	WT	Inoc	14.5444	DH_20_018	Culture	0.810138	745232	0.831698
Inoc	WITS 02	Culture	Acapsular	Inoc	14.1412	DH_20_018	Culture	0.810138	1.09117e+06	1.60362
Inoc	WITS 02	Culture	WT	Inoc	16.0107	DH_20_018	Culture	0.810138	269718	0.396385
Inoc	WITS 11	Culture	Acapsular	Inoc	14.4303	DH_20_018	Culture	0.810138	892987	1.12488
Inoc	WITS 11	Culture	WT	Inoc	14.6457	DH_20_018	Culture	0.810138	694714	0.87512
Inoc	WITS 17	Culture	Acapsular	Inoc	13.5525	DH_20_018	Culture	0.810138	1.64096e+06	1.48483
Inoc	WITS 17	Culture	WT	Inoc	14.9329	DH_20_018	Culture	0.810138	569335	0.515165
Inoc	WITS 19	Culture	Acapsular	Inoc	14.358	DH_20_018	Culture	0.810138	938901	1.16188
Inoc	WITS 19	Culture	WT	Inoc	14.6824	DH_20_018	Culture	0.810138	677273	0.838119
Inoc	WITS 21	Culture	Acapsular	Inoc	14.586	DH_20_018	Culture	0.810138	801650	1.15615
Inoc	WITS 21	Culture	WT	Inoc	14.8934	DH_20_018	Culture	0.810138	585111	0.843853
