# Supplementary material for: Fitness advantage of Bacteroides thetaiotaomicron capsular polysaccharide in the mouse gut depends on the resident microbiota
Source: eLife. 2023 Feb 9;12:e81212. doi: 10.7554/eLife.81212 (PMC10014078; doi:10.7554/eLife.81212)
Supplement: Figure 3—source data 1. [file elife-81212-fig3-data1.xlsx]

## Sheet: Fig3
Fig.3A: Competitive index (starting 1:1)				Fig.3B Colonization probability (competition)						Fig 3C and D: Net growth rate and lag-phase duration
Microbiota	Sample	Ratio_Ery_Tet		Strain	Microbiota	Colonization	log10_betha_mean	log10_betha_95IC		Strain	Microbiota	Sample	netgrowth	delay
GF	781A	15.4545		acapsular	GF	comp	-1.27	0.08		WT	Oligo	580A	0.515066	-0.0917124
GF	782A	7.03704		acapsular	LCM	comp	-2.63	0.13		WT	Oligo	581A	0.470887	5.90489
GF	783A	32		acapsular	Oligo	comp	-3.4	0.07		WT	Oligo	582A	0.596339	5.84393
LCM	784A	83.3333		acapsular	SPF	comp	-6.59	0.05		WT	Oligo	60C	0.464887	5.63168
LCM	785A	66.6667								WT	Oligo	61C	0.44086	0.27829
LCM	786A	150								WT	Oligo	62C	0.56219	5.50559
LCM	787A	76.9231								WT	Oligo	63C	0.480508	0.00450562
Oligo	788A	133.333								acaps	Oligo	570A	0.416171	9.13307
Oligo	789A	80								acaps	Oligo	571A	0.406632	10.4366
Oligo	790A	153.846								acaps	Oligo	572A	0.387252	13.5774
Oligo	791A	100								acaps	Oligo	573A	0.345197	6.97513
SPF	792A	34545.5								acaps	Oligo	64C	0.353247	-0.0378183
SPF	793A	15454.5								acaps	Oligo	65C	0.44128	7.68559
SPF	794A	230000								acaps	Oligo	66C	0.323525	5.34757
SPF	795A	2315.79								acaps	Oligo	67C	0.467433	9.69613
										acaps	Oligo	68C	0.417589	7.43993

## Sheet: Fig3_Supp1
Fig.3-Suppl.A: WT and acapsular load					Fig.3-Suppl.B: Total bacteria load competition					Fig.3-Suppl.C: Competitive index during competition (corrected by inoculum ratio)
Microbiota	Sample	CFU_g total	Strain		Sample	Microbiota	Experiment	CFU_g total		Sample	Microbiota	Experiment	CFU_Acap	CFU_Wt	Sample_g	Ratio	Inoc WT/Acap	Corrected
GF	781A	2.70636e+09	acapsular		42B	GF	DH_20_036	5.19842e+10		42B	GF	DH_20_036	30000	44800000000	0.8618	1490000	287000	5.21
GF	782A	4.24062e+09	acapsular		43B	GF	DH_20_036	5.72878e+10		41B	GF	DH_20_036	3900	25600000000	0.8083	6560000	287000	22.9
GF	783A	1.52045e+09	acapsular		41B	GF	DH_20_036	3.16714e+10		46B	GF	DH_20_036	10000	19200000000	0.7319	1920000	287000	6.7
GF	781A	4.18256e+10	WT		46B	GF	DH_20_036	2.62331e+10		45B	GF	DH_20_036	16000	25600000000	0.952	1600000	287000	5.58
GF	782A	2.98414e+10	WT		40B	GF	DH_20_036	3.4885e+10		40B	GF	DH_20_036	900	32000000000	0.9173	35600000	287000	124
GF	783A	4.86544e+10	WT		44B	GF	DH_20_036	4.20278e+10		43B	GF	DH_20_036	5700	38400000000	0.6703	6740000	287000	23.5
LCM	784A	1.31926e+07	acapsular		45B	GF	DH_20_036	2.68908e+10		44B	GF	DH_20_036	7700	32000000000	0.7614	4160000	287000	14.5
LCM	785A	2.10256e+07	acapsular		405B	LCM	DH_21_007	2.09287e+09		928A	Oligo	DH_20_034	7000	7000000000	0.521	1000000	1630	615
LCM	786A	8.76808e+06	acapsular		406B	LCM	DH_21_007	2.26441e+09		929A	Oligo	DH_20_034	11000	17000000000	0.5589	1550000	1630	951
LCM	787A	2.32933e+07	acapsular		408B	LCM	DH_21_007	2.84168e+09		927A	Oligo	DH_20_034	6000	6000000000	0.7353	1000000	1630	615
LCM	784A	1.09938e+09	WT		47B	LCM	DH_20_036	3.21867e+09		930A	Oligo	DH_20_034	6000	13000000000	0.5521	2170000	1630	1330
LCM	785A	1.40171e+09	WT		404B	LCM	DH_21_007	2.31814e+09		926A	Oligo	DH_20_034	29000	4000000000	0.7077	138000	1630	84.9
LCM	786A	1.31521e+09	WT		49B	LCM	DH_20_036	3.01545e+09		47B	LCM	DH_20_036	2100	1600000000	0.4971	762000	2050	372
LCM	787A	1.79179e+09	WT		403B	LCM	DH_21_007	1.13976e+09		53B	LCM	DH_20_036	18000	3200000000	0.527	178000	2050	86.9
Oligo	788A	4.88281e+07	acapsular		50B	LCM	DH_20_036	9.2671e+09		50B	LCM	DH_20_036	3000	4160000000	0.4489	1390000	2050	678
Oligo	789A	8.45881e+07	acapsular		52B	LCM	DH_20_036	4.96316e+09		49B	LCM	DH_20_036	3700	1600000000	0.5306	432000	2050	211
Oligo	790A	4.63541e+07	acapsular		407B	LCM	DH_21_007	4.02839e+09		52B	LCM	DH_20_036	2300	1280000000	0.2579	557000	2050	272
Oligo	791A	6.38162e+07	acapsular		53B	LCM	DH_20_036	6.07211e+09		48B	LCM	DH_20_036	3700	3200000000	0.5423	865000	2050	423
Oligo	788A	6.51042e+09	WT		48B	LCM	DH_20_036	5.90079e+09		51B	LCM	DH_20_036	3100	1600000000	0.4625	516000	2050	252
Oligo	789A	6.76704e+09	WT		51B	LCM	DH_20_036	3.45946e+09		54B	Oligo	DH_20_036	3100	10600000000	0.6304	3420000	2050	1670
Oligo	790A	7.1314e+09	WT		928A	Oligo	DH_20_034	1.34357e+10		56B	Oligo	DH_20_036	700	3840000000	0.3419	5490000	2050	2680
Oligo	791A	6.38162e+09	WT		932A	Oligo	DH_20_034	1.38972e+10		55B	Oligo	DH_20_036	300	4800000000	0.3799	16000000	2050	7820
SPF	792A	5198.49	acapsular		929A	Oligo	DH_20_034	3.04169e+10		933A	Oligo	DH_20_034	35000	10000000000	0.6334	286000	2050	140
SPF	793A	5408.06	acapsular		927A	Oligo	DH_20_034	8.15993e+09		934A	Oligo	DH_20_034	130000	9000000000	0.6451	69200	2050	33.8
SPF	794A	431.779	acapsular		933A	Oligo	DH_20_034	1.57878e+10		931A	Oligo	DH_20_034	22000	64000000000	0.538	2910000	2050	1420
SPF	795A	73529.4	acapsular		934A	Oligo	DH_20_034	1.39513e+10		932A	Oligo	DH_20_034	13000	7000000000	0.5037	538000	2050	263
SPF	792A	1.79584e+08	WT		54B	Oligo	DH_20_036	1.68147e+10		937A	SPF	DH_20_034	10	50000000	0.5685	5000000	1.9	2640000
SPF	793A	8.35792e+07	WT		56B	Oligo	DH_20_036	1.12314e+10		938A	SPF	DH_20_034	440	20000000	0.65	45500	1.9	24000
SPF	794A	9.93092e+07	WT		930A	Oligo	DH_20_034	2.35465e+10		935A	SPF	DH_20_034	630	80000000	0.4961	127000	1.9	66900
SPF	795A	1.70279e+08	WT		931A	Oligo	DH_20_034	1.18959e+11		936A	SPF	DH_20_034	110	90000000	0.4883	818000	1.9	431000
					926A	Oligo	DH_20_034	5.65211e+09		57B	SPF	DH_20_036	2100	62400000	0.3317	29700	1.9	15700
					55B	Oligo	DH_20_036	1.26349e+10		59B	SPF	DH_20_036	600	30400000	0.32	50700	1.9	26700
					939A	SPF	DH_20_034	160000000		58B	SPF	DH_20_036	600	42400000	0.2436	70700	1.9	37200
					936A	SPF	DH_20_034	1.84313e+08		939A	SPF	DH_20_034	10	50000000	0.3125	70700	0.185	382000
					61B	SPF	DH_20_036	5.39115e+07		941A	SPF	DH_20_034	280000	100000000	0.3858	357	0.185	1930
					937A	SPF	DH_20_034	8.79507e+07		940A	SPF	DH_20_034	370	60000000	0.2504	162000	0.185	876000
					942A	SPF	DH_20_034	6.71141e+07		942A	SPF	DH_20_034	40	25000000	0.3725	625000	0.185	3380000
					63B	SPF	DH_20_036	4.61538e+07		407B	LCM	DH_21_007	9000	2100000000	0.5213	233000	727	321
					935A	SPF	DH_20_034	1.61258e+08		403B	LCM	DH_21_007	3000	800000000	0.7019	267000	727	367
					57B	SPF	DH_20_036	1.88122e+08		405B	LCM	DH_21_007	5000	1600000000	0.7645	320000	727	440
					938A	SPF	DH_20_034	3.07692e+07		408B	LCM	DH_21_007	6000	2100000000	0.739	350000	727	481
					60B	SPF	DH_20_036	9.06344e+07		406B	LCM	DH_21_007	1000	1300000000	0.5741	1300000	727	1790
					940A	SPF	DH_20_034	2.39617e+08		404B	LCM	DH_21_007	5000	2100000000	0.9059	420000	727	578
					941A	SPF	DH_20_034	2.59202e+08		60B	SPF	DH_20_036	355	24000000	0.2648	67600	3.73	18100
					59B	SPF	DH_20_036	95000000		62B	SPF	DH_20_036	310	9600000	0.2836	31000	3.73	8310
					64B	SPF	DH_20_036	7.38112e+07		61B	SPF	DH_20_036	50	18400000	0.3413	368000	3.73	98700
					62B	SPF	DH_20_036	3.38505e+07		63B	SPF	DH_20_036	150	12000000	0.26	80000	3.73	21500
					58B	SPF	DH_20_036	1.74056e+08		64B	SPF	DH_20_036	110	10400000	0.1409	94500	3.73	25400

## Sheet: Fig3-Supp2
Fig3-Supp2: Single strain colonization						ND: Non detectable
Time_h	CFUg	log10CFUg	Strain	MouseID	Experiment
0	9000	3.95424	Acapsular	Inoc	ES22-008
0	1600	3.20412	Acapsular	Inoc	DH_21_013
4	0	ND	Acapsular	64C	ES22-008
4	0	ND	Acapsular	65C	ES22-008
4	0	ND	Acapsular	66C	ES22-008
4	0	ND	Acapsular	67C	ES22-008
4	0	ND	Acapsular	68C	ES22-008
4	131.579	2.11919	Acapsular	570A	DH_21_013
4	200	2.30103	Acapsular	571A	DH_21_013
4	0	ND	Acapsular	572A	DH_21_013
4	71.4286	1.85387	Acapsular	573A	DH_21_013
8	0	ND	Acapsular	64C	ES22-008
8	0	ND	Acapsular	65C	ES22-008
8	0	ND	Acapsular	66C	ES22-008
8	0	ND	Acapsular	67C	ES22-008
8	0	ND	Acapsular	68C	ES22-008
8	1282.05	3.10791	Acapsular	570A	DH_21_013
8	0	ND	Acapsular	571A	DH_21_013
8	0	ND	Acapsular	572A	DH_21_013
8	0	ND	Acapsular	573A	DH_21_013
12	0	ND	Acapsular	64C	ES22-008
12	0	ND	Acapsular	65C	ES22-008
12	0	ND	Acapsular	66C	ES22-008
12	0	ND	Acapsular	67C	ES22-008
12	0	ND	Acapsular	68C	ES22-008
12	0	ND	Acapsular	570A	DH_21_013
12	0	ND	Acapsular	571A	DH_21_013
12	0	ND	Acapsular	572A	DH_21_013
12	1612.9	3.20761	Acapsular	573A	DH_21_013
16	96800	4.98588	Acapsular	64C	ES22-008
16	15800	4.19866	Acapsular	65C	ES22-008
16	21100	4.32428	Acapsular	66C	ES22-008
16	18500	4.26717	Acapsular	67C	ES22-008
16	9090	3.95856	Acapsular	68C	ES22-008
16	892.857	2.95078	Acapsular	570A	DH_21_013
16	322.581	2.50864	Acapsular	571A	DH_21_013
16	0	ND	Acapsular	572A	DH_21_013
16	500	2.69897	Acapsular	573A	DH_21_013
20	1000000	6	Acapsular	64C	ES22-008
20	71200	4.85248	Acapsular	65C	ES22-008
20	48400	4.68485	Acapsular	66C	ES22-008
20	15600	4.19312	Acapsular	67C	ES22-008
20	32300	4.5092	Acapsular	68C	ES22-008
22	7964.29	3.90115	Acapsular	570A	DH_21_013
22	5128.21	3.70997	Acapsular	571A	DH_21_013
22	1071.43	3.02996	Acapsular	572A	DH_21_013
22	4807.69	3.68194	Acapsular	573A	DH_21_013
24	517000	5.71349	Acapsular	64C	ES22-008
24	250000	5.39794	Acapsular	65C	ES22-008
24	21700	4.33646	Acapsular	66C	ES22-008
24	135000	5.13033	Acapsular	67C	ES22-008
24	182000	5.26007	Acapsular	68C	ES22-008
28	3130000	6.49554	Acapsular	64C	ES22-008
28	2080000	6.31806	Acapsular	65C	ES22-008
28	1000000	6	Acapsular	66C	ES22-008
28	1090000	6.03743	Acapsular	67C	ES22-008
28	14300000	7.15534	Acapsular	68C	ES22-008
28	204545	5.31079	Acapsular	570A	DH_21_013
28	111111	5.04576	Acapsular	571A	DH_21_013
28	14705.9	4.16749	Acapsular	572A	DH_21_013
28	37931	4.57899	Acapsular	573A	DH_21_013
32	75000000	7.87506	Acapsular	64C	ES22-008
32	16700000	7.22272	Acapsular	65C	ES22-008
32	2040000	6.30963	Acapsular	66C	ES22-008
32	9090000	6.95856	Acapsular	67C	ES22-008
32	16700000	7.22272	Acapsular	68C	ES22-008
36	100000000	8	Acapsular	64C	ES22-008
36	90900000	7.95856	Acapsular	65C	ES22-008
36	8930000	6.95085	Acapsular	66C	ES22-008
36	129000000	8.11059	Acapsular	67C	ES22-008
36	10700000	7.02938	Acapsular	68C	ES22-008
36	6.02273e+06	6.77979	Acapsular	570A	DH_21_013
36	5000000	6.69897	Acapsular	571A	DH_21_013
36	714286	5.85387	Acapsular	572A	DH_21_013
36	3281250	6.51604	Acapsular	573A	DH_21_013
47	2.72727e+08	8.43573	Acapsular	570A	DH_21_013
47	7.14286e+07	7.85387	Acapsular	571A	DH_21_013
47	1.54762e+07	7.18966	Acapsular	572A	DH_21_013
47	6.37931e+07	7.80477	Acapsular	573A	DH_21_013
0	20000	4.30103	WT	Inoc	ES22-008
0	2200	3.34242	WT	Inoc	DH_21_013
4	0	ND	WT	60C	ES22-008
4	0	ND	WT	61C	ES22-008
4	0	ND	WT	62C	ES22-008
4	0	ND	WT	63C	ES22-008
4	1184.21	3.07343	WT	580A	DH_21_013
4	0	ND	WT	581A	DH_21_013
4	500	2.69897	WT	582A	DH_21_013
8	0	ND	WT	60C	ES22-008
8	0	ND	WT	61C	ES22-008
8	0	ND	WT	62C	ES22-008
8	0	ND	WT	63C	ES22-008
8	6410.26	3.80688	WT	580A	DH_21_013
8	0	ND	WT	581A	DH_21_013
8	2631.58	3.42022	WT	582A	DH_21_013
12	0	ND	WT	60C	ES22-008
12	0	ND	WT	61C	ES22-008
12	0	ND	WT	62C	ES22-008
12	0	ND	WT	63C	ES22-008
12	53333.3	4.727	WT	580A	DH_21_013
12	2380.95	3.37675	WT	581A	DH_21_013
12	1315.79	3.11919	WT	582A	DH_21_013
16	55600	4.74507	WT	60C	ES22-008
16	571000	5.75664	WT	61C	ES22-008
16	139000	5.14301	WT	62C	ES22-008
16	1000000	6	WT	63C	ES22-008
16	125000	5.09691	WT	580A	DH_21_013
16	4166.67	3.61979	WT	581A	DH_21_013
16	47916.7	4.68049	WT	582A	DH_21_013
20	576000	5.76042	WT	60C	ES22-008
20	3040000	6.48287	WT	61C	ES22-008
20	1880000	6.27416	WT	62C	ES22-008
20	7810000	6.89265	WT	63C	ES22-008
22	4687500	6.67094	WT	580A	DH_21_013
22	46000	4.66276	WT	581A	DH_21_013
22	1.16279e+06	6.0655	WT	582A	DH_21_013
24	2140000	6.33041	WT	60C	ES22-008
24	16660000	7.22167	WT	61C	ES22-008
24	30800000	7.48855	WT	62C	ES22-008
24	113000000	8.05308	WT	63C	ES22-008
28	41600000	7.61909	WT	60C	ES22-008
28	266000000	8.42488	WT	61C	ES22-008
28	241000000	8.38202	WT	62C	ES22-008
28	278000000	8.44404	WT	63C	ES22-008
28	150000000	8.17609	WT	580A	DH_21_013
28	4.31818e+06	6.6353	WT	581A	DH_21_013
28	2.36842e+07	7.37446	WT	582A	DH_21_013
32	71400000	7.8537	WT	60C	ES22-008
32	412000000	8.6149	WT	61C	ES22-008
32	938000000	8.9722	WT	62C	ES22-008
32	2500000000	9.39794	WT	63C	ES22-008
36	250000000	8.39794	WT	60C	ES22-008
36	1666000000	9.22167	WT	61C	ES22-008
36	806000000	8.90634	WT	62C	ES22-008
36	1090000000	9.03743	WT	63C	ES22-008
36	8.07692e+08	8.90725	WT	580A	DH_21_013
36	78125000	7.89279	WT	581A	DH_21_013
36	2.96296e+08	8.47173	WT	582A	DH_21_013
47	3.33333e+09	9.52288	WT	580A	DH_21_013
47	1000000000	9	WT	581A	DH_21_013
47	8.62069e+08	8.93554	WT	582A	DH_21_013

## Sheet: Fig3-Supp3
log2(PTR):genome_id/sample_id	HOCE22-4_e22ms26_c25_fec_METAG_10M_subsample.1.fq	HOCE22-4_e22ms26_c25_fec_METAG_15M_subsample.1.fq	HOCE22-4_e22ms26_c25_fec_METAG_20M_subsample.1.fq	HOCE22-4_e22ms26_c25_fec_METAG_25M_subsample.1.fq	HOCE22-4_e22ms26_c25_fec_METAG_30M_subsample.1.fq	HOCE22-4_e22ms26_c25_fec_METAG_35M_subsample.1.fq	HOCE22-4_e22ms26_c25_fec_METAG_subsample.1.fq
CP015399.2.genome	0.373738	0.377756	0.379957	0.380754	0.380813	0.380077	0.379873
CP015401.2.genome	0.634702	0.634839	0.635542	0.635521	0.634557	0.634549	0.634912
CP015403.2.genome	0.704794	0.708819	0.710246	0.713416	0.713107	0.718175	0.717243
CP015404.2.genome	0.766718	0.765037	0.764779	0.765661	0.762564	0.755822	0.751909
CP015405.2.genome	0.595834	0.587962	0.586118	0.587387	0.583819	0.587245	0.587348
CP015406.2.genome	0.310066	0.304779	0.303816	0.309377	0.311875	0.310048	0.307365
CP015409.2.genome	0.336596	0.336085	0.334311	0.330249	0.329895	0.33036	0.331521
CP015410.2.genome	0.403795	0.370236	0.379799	0.389421	0.385411	0.383752	0.380821
CP092641.1.genome	0.900049	0.907536	0.905147	0.905838	0.901638	0.903794	0.896925

## Sheet: Fig3-Supp4
	B. theta load in different gut sections (CFU, detection limit 100CFU)
	WT						Acapsular
Upper SI	7320	156000	100	5710	714000	100	100	3700	100	100	7690	2780
Lower SI	10900	5170	6820	50000	20800	2000	100	8820	1110	6250	2170
Cecum	37900000	91500000	139000000	127000000	10900000	478000000	15600000	2200000	5780000	22000000	7140000	19000000
Colon lumen	26000000	53300000	18100000	56700000	5810000	446000000	18500000	1250000	4000000	17600000	20600000	33300000
Colon mucus	1150000	12300000	7810000	4170000	1460000	14300000	658000	484000	200000	800000	200000	714000
