# Supplementary material for: Fitness advantage of Bacteroides thetaiotaomicron capsular polysaccharide in the mouse gut depends on the resident microbiota
Source: eLife. 2023 Feb 9;12:e81212. doi: 10.7554/eLife.81212 (PMC10014078; doi:10.7554/eLife.81212)
Supplement: Figure 4—source data 1. [file elife-81212-fig4-data1.xlsx]

## Sheet: Fig4
B.theta populations and barcode presence before and after challenge												Fig.4C: Survival probability
Sample	Target	Challenge	Source	Day	Ctm	Experiment	Microbiota	Strain	CFUg_untagged	CFUg_tagged		Strain	Challenge	Colonization	log10_betha_mean	log10_betha_95IC_lo	log10_betha_95IC_up
274A	WITS 01	Control	Feces	0	14.607	DH_19_041	GF	WT	2.45098e+11	18627.5		WT	Control	single	0	-1.5	0
274A	WITS 02	Control	Feces	0	15.5235	DH_19_041	GF	WT	2.45098e+11	18627.5		WT	HFD	single	0	-1.75	0
274A	WITS 11	Control	Feces	0	12.6185	DH_19_041	GF	WT	2.45098e+11	18627.5		WT	Stm_avirulent	single	-2.35	-2.38	-2.32
274A	WITS 17	Control	Feces	0	14.1325	DH_19_041	GF	WT	2.45098e+11	18627.5		WT	Stm_attenuated	single	-3.28	-3.38	-3.18
274A	WITS 19	Control	Feces	0	12.88	DH_19_041	GF	WT	2.45098e+11	18627.5
274A	WITS 21	Control	Feces	0	12.057	DH_19_041	GF	WT	2.45098e+11	18627.5
275A	WITS 01	Control	Feces	0	14.3255	DH_19_041	GF	WT	2.36264e+11	153846
275A	WITS 02	Control	Feces	0	21.9745	DH_19_041	GF	WT	2.36264e+11	153846
275A	WITS 11	Control	Feces	0	12.4855	DH_19_041	GF	WT	2.36264e+11	153846
275A	WITS 17	Control	Feces	0	13.186	DH_19_041	GF	WT	2.36264e+11	153846
275A	WITS 19	Control	Feces	0	12.791	DH_19_041	GF	WT	2.36264e+11	153846
275A	WITS 21	Control	Feces	0	11.7485	DH_19_041	GF	WT	2.36264e+11	153846
276A	WITS 01	Control	Feces	0	13.107	DH_19_041	GF	WT	2.85714e+11	887755
276A	WITS 02	Control	Feces	0	18.0675	DH_19_041	GF	WT	2.85714e+11	887755
276A	WITS 11	Control	Feces	0	14.138	DH_19_041	GF	WT	2.85714e+11	887755
276A	WITS 17	Control	Feces	0	13.017	DH_19_041	GF	WT	2.85714e+11	887755
276A	WITS 19	Control	Feces	0	14.324	DH_19_041	GF	WT	2.85714e+11	887755
276A	WITS 21	Control	Feces	0	11.908	DH_19_041	GF	WT	2.85714e+11	887755
274A	WITS 01	Control	Cecum	3	17.642	DH_19_041	GF	WT	1.22449e+10	4217.69
274A	WITS 02	Control	Cecum	3	19.33	DH_19_041	GF	WT	1.22449e+10	4217.69
274A	WITS 11	Control	Cecum	3	15.511	DH_19_041	GF	WT	1.22449e+10	4217.69
274A	WITS 17	Control	Cecum	3	16.523	DH_19_041	GF	WT	1.22449e+10	4217.69
274A	WITS 19	Control	Cecum	3	16.3555	DH_19_041	GF	WT	1.22449e+10	4217.69
274A	WITS 21	Control	Cecum	3	15.3895	DH_19_041	GF	WT	1.22449e+10	4217.69
275A	WITS 01	Control	Cecum	3	16.3025	DH_19_041	GF	WT	8.24176e+09	12087.9
275A	WITS 02	Control	Cecum	3	20.803	DH_19_041	GF	WT	8.24176e+09	12087.9
275A	WITS 11	Control	Cecum	3	14.727	DH_19_041	GF	WT	8.24176e+09	12087.9
275A	WITS 17	Control	Cecum	3	15.866	DH_19_041	GF	WT	8.24176e+09	12087.9
275A	WITS 19	Control	Cecum	3	14.6735	DH_19_041	GF	WT	8.24176e+09	12087.9
275A	WITS 21	Control	Cecum	3	13.825	DH_19_041	GF	WT	8.24176e+09	12087.9
276A	WITS 01	Control	Cecum	3	14.0305	DH_19_041	GF	WT	1.79104e+10	253731
276A	WITS 02	Control	Cecum	3	19.429	DH_19_041	GF	WT	1.79104e+10	253731
276A	WITS 11	Control	Cecum	3	15.4935	DH_19_041	GF	WT	1.79104e+10	253731
276A	WITS 17	Control	Cecum	3	15.0875	DH_19_041	GF	WT	1.79104e+10	253731
276A	WITS 19	Control	Cecum	3	14.89	DH_19_041	GF	WT	1.79104e+10	253731
276A	WITS 21	Control	Cecum	3	12.6615	DH_19_041	GF	WT	1.79104e+10	253731
274A	WITS 01	Control	Feces	3	17.542	DH_19_041	GF	WT	1.76471e+11	17647.1
274A	WITS 02	Control	Feces	3	19.9215	DH_19_041	GF	WT	1.76471e+11	17647.1
274A	WITS 11	Control	Feces	3	15.8995	DH_19_041	GF	WT	1.76471e+11	17647.1
274A	WITS 17	Control	Feces	3	18.2265	DH_19_041	GF	WT	1.76471e+11	17647.1
274A	WITS 19	Control	Feces	3	16.838	DH_19_041	GF	WT	1.76471e+11	17647.1
274A	WITS 21	Control	Feces	3	16.1525	DH_19_041	GF	WT	1.76471e+11	17647.1
275A	WITS 01	Control	Feces	3	19.36	DH_19_041	GF	WT	190000000000	100000
275A	WITS 02	Control	Feces	3	21.7295	DH_19_041	GF	WT	190000000000	100000
275A	WITS 11	Control	Feces	3	14.971	DH_19_041	GF	WT	190000000000	100000
275A	WITS 17	Control	Feces	3	16.8045	DH_19_041	GF	WT	190000000000	100000
275A	WITS 19	Control	Feces	3	14.8325	DH_19_041	GF	WT	190000000000	100000
275A	WITS 21	Control	Feces	3	13.9175	DH_19_041	GF	WT	190000000000	100000
276A	WITS 01	Control	Feces	3	13.9565	DH_19_041	GF	WT	3.72549e+11	568627
276A	WITS 02	Control	Feces	3	19.643	DH_19_041	GF	WT	3.72549e+11	568627
276A	WITS 11	Control	Feces	3	14.822	DH_19_041	GF	WT	3.72549e+11	568627
276A	WITS 17	Control	Feces	3	15.17	DH_19_041	GF	WT	3.72549e+11	568627
276A	WITS 19	Control	Feces	3	14.713	DH_19_041	GF	WT	3.72549e+11	568627
276A	WITS 21	Control	Feces	3	12.3685	DH_19_041	GF	WT	3.72549e+11	568627
414A	WITS 01	Control	Feces	0	13.8405	DH_20_002	GF	WT	7.38462e+11	11538.5
414A	WITS 02	Control	Feces	0	16.0075	DH_20_002	GF	WT	7.38462e+11	11538.5
414A	WITS 11	Control	Feces	0	13.1695	DH_20_002	GF	WT	7.38462e+11	11538.5
414A	WITS 17	Control	Feces	0	18.1135	DH_20_002	GF	WT	7.38462e+11	11538.5
414A	WITS 19	Control	Feces	0	13.506	DH_20_002	GF	WT	7.38462e+11	11538.5
414A	WITS 21	Control	Feces	0	13.1715	DH_20_002	GF	WT	7.38462e+11	11538.5
415A	WITS 01	Control	Feces	0	13.9135	DH_20_002	GF	WT	1.17073e+11	31707.3
415A	WITS 02	Control	Feces	0	15.992	DH_20_002	GF	WT	1.17073e+11	31707.3
415A	WITS 11	Control	Feces	0	13.778	DH_20_002	GF	WT	1.17073e+11	31707.3
415A	WITS 17	Control	Feces	0	17.275	DH_20_002	GF	WT	1.17073e+11	31707.3
415A	WITS 19	Control	Feces	0	13.26	DH_20_002	GF	WT	1.17073e+11	31707.3
415A	WITS 21	Control	Feces	0	13.987	DH_20_002	GF	WT	1.17073e+11	31707.3
414A	WITS 01	Control	Feces	3	14.384	DH_20_002	GF	WT	6.47191e+11	6741.57
414A	WITS 02	Control	Feces	3	16.8135	DH_20_002	GF	WT	6.47191e+11	6741.57
414A	WITS 11	Control	Feces	3	13.947	DH_20_002	GF	WT	6.47191e+11	6741.57
414A	WITS 17	Control	Feces	3	18.033	DH_20_002	GF	WT	6.47191e+11	6741.57
414A	WITS 19	Control	Feces	3	14.2665	DH_20_002	GF	WT	6.47191e+11	6741.57
414A	WITS 21	Control	Feces	3	12.192	DH_20_002	GF	WT	6.47191e+11	6741.57
415A	WITS 01	Control	Feces	3	13.7525	DH_20_002	GF	WT	200000000000	15625
415A	WITS 02	Control	Feces	3	33.666	DH_20_002	GF	WT	200000000000	15625
415A	WITS 11	Control	Feces	3	13.9665	DH_20_002	GF	WT	200000000000	15625
415A	WITS 17	Control	Feces	3	19.413	DH_20_002	GF	WT	200000000000	15625
415A	WITS 19	Control	Feces	3	12.5765	DH_20_002	GF	WT	200000000000	15625
415A	WITS 21	Control	Feces	3	13.968	DH_20_002	GF	WT	200000000000	15625
414A	WITS 01	Control	Cecum	3	15.3985	DH_20_002	GF	WT	1.61744e+11	2250.35
414A	WITS 02	Control	Cecum	3	18.049	DH_20_002	GF	WT	1.61744e+11	2250.35
414A	WITS 11	Control	Cecum	3	13.765	DH_20_002	GF	WT	1.61744e+11	2250.35
414A	WITS 17	Control	Cecum	3	17.806	DH_20_002	GF	WT	1.61744e+11	2250.35
414A	WITS 19	Control	Cecum	3	14.0985	DH_20_002	GF	WT	1.61744e+11	2250.35
414A	WITS 21	Control	Cecum	3	12.7855	DH_20_002	GF	WT	1.61744e+11	2250.35
415A	WITS 01	Control	Cecum	3	14.388	DH_20_002	GF	WT	4.20263e+11	12007.5
415A	WITS 02	Control	Cecum	3	17.479	DH_20_002	GF	WT	4.20263e+11	12007.5
415A	WITS 11	Control	Cecum	3	13.92	DH_20_002	GF	WT	4.20263e+11	12007.5
415A	WITS 17	Control	Cecum	3	19.1655	DH_20_002	GF	WT	4.20263e+11	12007.5
415A	WITS 19	Control	Cecum	3	12.93	DH_20_002	GF	WT	4.20263e+11	12007.5
415A	WITS 21	Control	Cecum	3	13.913	DH_20_002	GF	WT	4.20263e+11	12007.5
796A	WITS 01	Control	Cecum	3	14.82	DH_20_021	GF	WT	1.78223e+10	250.627
796A	WITS 02	Control	Cecum	3	17.044	DH_20_021	GF	WT	1.78223e+10	250.627
796A	WITS 11	Control	Cecum	3	12.893	DH_20_021	GF	WT	1.78223e+10	250.627
796A	WITS 17	Control	Cecum	3	14.412	DH_20_021	GF	WT	1.78223e+10	250.627
796A	WITS 19	Control	Cecum	3	17.0775	DH_20_021	GF	WT	1.78223e+10	250.627
796A	WITS 21	Control	Cecum	3	14.987	DH_20_021	GF	WT	1.78223e+10	250.627
797A	WITS 01	Control	Cecum	3	25.9975	DH_20_021	GF	WT	1.34452e+10	279.66
797A	WITS 02	Control	Cecum	3	16.8525	DH_20_021	GF	WT	1.34452e+10	279.66
797A	WITS 11	Control	Cecum	3	18.7985	DH_20_021	GF	WT	1.34452e+10	279.66
797A	WITS 17	Control	Cecum	3	17.0005	DH_20_021	GF	WT	1.34452e+10	279.66
797A	WITS 19	Control	Cecum	3	19.6655	DH_20_021	GF	WT	1.34452e+10	279.66
797A	WITS 21	Control	Cecum	3	18.3925	DH_20_021	GF	WT	1.34452e+10	279.66
796A	WITS 01	Control	Feces	0	14.4545	DH_20_021	GF	WT	64000000000	1466.67
796A	WITS 02	Control	Feces	0	16.9155	DH_20_021	GF	WT	64000000000	1466.67
796A	WITS 11	Control	Feces	0	13.1645	DH_20_021	GF	WT	64000000000	1466.67
796A	WITS 17	Control	Feces	0	14.699	DH_20_021	GF	WT	64000000000	1466.67
796A	WITS 19	Control	Feces	0	16.9845	DH_20_021	GF	WT	64000000000	1466.67
796A	WITS 21	Control	Feces	0	13.9825	DH_20_021	GF	WT	64000000000	1466.67
797A	WITS 01	Control	Feces	0	18.939	DH_20_021	GF	WT	4.66667e+10	833.333
797A	WITS 02	Control	Feces	0	36.5235	DH_20_021	GF	WT	4.66667e+10	833.333
797A	WITS 11	Control	Feces	0	13.011	DH_20_021	GF	WT	4.66667e+10	833.333
797A	WITS 17	Control	Feces	0	13.165	DH_20_021	GF	WT	4.66667e+10	833.333
797A	WITS 19	Control	Feces	0	14.047	DH_20_021	GF	WT	4.66667e+10	833.333
797A	WITS 21	Control	Feces	0	14.6005	DH_20_021	GF	WT	4.66667e+10	833.333
796A	WITS 01	Control	Feces	3	16.4635	DH_20_021	GF	WT	2.33463e+10	1896.89
796A	WITS 02	Control	Feces	3	20.2145	DH_20_021	GF	WT	2.33463e+10	1896.89
796A	WITS 11	Control	Feces	3	16.276	DH_20_021	GF	WT	2.33463e+10	1896.89
796A	WITS 17	Control	Feces	3	17.7905	DH_20_021	GF	WT	2.33463e+10	1896.89
796A	WITS 19	Control	Feces	3	19.2785	DH_20_021	GF	WT	2.33463e+10	1896.89
796A	WITS 21	Control	Feces	3	18.018	DH_20_021	GF	WT	2.33463e+10	1896.89
797A	WITS 01	Control	Feces	3	34.4245	DH_20_021	GF	WT	5.48571e+10	2285.71
797A	WITS 02	Control	Feces	3	37.2025	DH_20_021	GF	WT	5.48571e+10	2285.71
797A	WITS 11	Control	Feces	3	15.9275	DH_20_021	GF	WT	5.48571e+10	2285.71
797A	WITS 17	Control	Feces	3	23.2855	DH_20_021	GF	WT	5.48571e+10	2285.71
797A	WITS 19	Control	Feces	3	17.2845	DH_20_021	GF	WT	5.48571e+10	2285.71
797A	WITS 21	Control	Feces	3	16.2885	DH_20_021	GF	WT	5.48571e+10	2285.71
582A	WITS 01	Control	Feces	0	13.3241	DH_20_013	GF	WT	6.7086e+10	838.574
582A	WITS 01	Control	Feces	3	15.1898	DH_20_013	GF	WT	3.79147e+10	1362.56
582A	WITS 01	Control	Cecum	3	14.9616	DH_20_013	GF	WT	1.5243e+10	473.115
582A	WITS 02	Control	Feces	0	15.6622	DH_20_013	GF	WT	6.7086e+10	838.574
582A	WITS 02	Control	Feces	3	33.5394	DH_20_013	GF	WT	3.79147e+10	1362.56
582A	WITS 02	Control	Cecum	3	14.2197	DH_20_013	GF	WT	1.5243e+10	473.115
582A	WITS 11	Control	Feces	0	12.4307	DH_20_013	GF	WT	6.7086e+10	838.574
582A	WITS 11	Control	Feces	3	15.7868	DH_20_013	GF	WT	3.79147e+10	1362.56
582A	WITS 11	Control	Cecum	3	14.1851	DH_20_013	GF	WT	1.5243e+10	473.115
582A	WITS 17	Control	Feces	0	15.7286	DH_20_013	GF	WT	6.7086e+10	838.574
582A	WITS 17	Control	Feces	3	31.7267	DH_20_013	GF	WT	3.79147e+10	1362.56
582A	WITS 17	Control	Cecum	3	21.1151	DH_20_013	GF	WT	1.5243e+10	473.115
582A	WITS 19	Control	Feces	0	14.095	DH_20_013	GF	WT	6.7086e+10	838.574
582A	WITS 19	Control	Feces	3	14.9337	DH_20_013	GF	WT	3.79147e+10	1362.56
582A	WITS 19	Control	Cecum	3	13.9996	DH_20_013	GF	WT	1.5243e+10	473.115
582A	WITS 21	Control	Feces	0	33.4867	DH_20_013	GF	WT	6.7086e+10	838.574
582A	WITS 21	Control	Feces	3	38.7847	DH_20_013	GF	WT	3.79147e+10	1362.56
582A	WITS 21	Control	Cecum	3	16.3681	DH_20_013	GF	WT	1.5243e+10	473.115
583A	WITS 01	Control	Feces	0	33.1709	DH_20_013	GF	WT	9.90826e+10	1433.49
583A	WITS 01	Control	Feces	3	28.7755	DH_20_013	GF	WT	6.68058e+10	469.729
583A	WITS 01	Control	Cecum	3	23.359	DH_20_013	GF	WT	1.32964e+10	260.714
583A	WITS 02	Control	Feces	0	16.343	DH_20_013	GF	WT	9.90826e+10	1433.49
583A	WITS 02	Control	Feces	3	32.1435	DH_20_013	GF	WT	6.68058e+10	469.729
583A	WITS 02	Control	Cecum	3	17.1928	DH_20_013	GF	WT	1.32964e+10	260.714
583A	WITS 11	Control	Feces	0	12.4919	DH_20_013	GF	WT	9.90826e+10	1433.49
583A	WITS 11	Control	Feces	3	16.174	DH_20_013	GF	WT	6.68058e+10	469.729
583A	WITS 11	Control	Cecum	3	14.7049	DH_20_013	GF	WT	1.32964e+10	260.714
583A	WITS 17	Control	Feces	0	14.5099	DH_20_013	GF	WT	9.90826e+10	1433.49
583A	WITS 17	Control	Feces	3	16.8171	DH_20_013	GF	WT	6.68058e+10	469.729
583A	WITS 17	Control	Cecum	3	15.3893	DH_20_013	GF	WT	1.32964e+10	260.714
583A	WITS 19	Control	Feces	0	13.7573	DH_20_013	GF	WT	9.90826e+10	1433.49
583A	WITS 19	Control	Feces	3	15.7744	DH_20_013	GF	WT	6.68058e+10	469.729
583A	WITS 19	Control	Cecum	3	12.9487	DH_20_013	GF	WT	1.32964e+10	260.714
583A	WITS 21	Control	Feces	0	16.5889	DH_20_013	GF	WT	9.90826e+10	1433.49
583A	WITS 21	Control	Feces	3	17.2245	DH_20_013	GF	WT	6.68058e+10	469.729
583A	WITS 21	Control	Cecum	3	18.2197	DH_20_013	GF	WT	1.32964e+10	260.714
584A	WITS 01	Control	Feces	0	13.3061	DH_20_013	GF	WT	1.70414e+11	1528.6
584A	WITS 01	Control	Feces	3	15.0014	DH_20_013	GF	WT	5.61404e+10	341.131
584A	WITS 01	Control	Cecum	3	15.2442	DH_20_013	GF	WT	1.323e+10	280.792
584A	WITS 02	Control	Feces	0	15.8394	DH_20_013	GF	WT	1.70414e+11	1528.6
584A	WITS 02	Control	Feces	3	31.4607	DH_20_013	GF	WT	5.61404e+10	341.131
584A	WITS 02	Control	Cecum	3	20.9978	DH_20_013	GF	WT	1.323e+10	280.792
584A	WITS 11	Control	Feces	0	13.377	DH_20_013	GF	WT	1.70414e+11	1528.6
584A	WITS 11	Control	Feces	3	29.4914	DH_20_013	GF	WT	5.61404e+10	341.131
584A	WITS 11	Control	Cecum	3	15.3825	DH_20_013	GF	WT	1.323e+10	280.792
584A	WITS 17	Control	Feces	0	14.03	DH_20_013	GF	WT	1.70414e+11	1528.6
584A	WITS 17	Control	Feces	3	32.777	DH_20_013	GF	WT	5.61404e+10	341.131
584A	WITS 17	Control	Cecum	3	17.1428	DH_20_013	GF	WT	1.323e+10	280.792
584A	WITS 19	Control	Feces	0	15.7884	DH_20_013	GF	WT	1.70414e+11	1528.6
584A	WITS 19	Control	Feces	3	15.9484	DH_20_013	GF	WT	5.61404e+10	341.131
584A	WITS 19	Control	Cecum	3	18.3601	DH_20_013	GF	WT	1.323e+10	280.792
584A	WITS 21	Control	Feces	0	12.7668	DH_20_013	GF	WT	1.70414e+11	1528.6
584A	WITS 21	Control	Feces	3	14.7444	DH_20_013	GF	WT	5.61404e+10	341.131
584A	WITS 21	Control	Cecum	3	13.8876	DH_20_013	GF	WT	1.323e+10	280.792
585A	WITS 01	Control	Feces	0	12.3655	DH_20_013	GF	WT	8.72727e+10	757.576
585A	WITS 01	Control	Feces	3	15.7723	DH_20_013	GF	WT	7.05411e+10	100.2
585A	WITS 01	Control	Cecum	3	13.7256	DH_20_013	GF	WT	1.20043e+10	264.38
585A	WITS 02	Control	Feces	0	31.3988	DH_20_013	GF	WT	8.72727e+10	757.576
585A	WITS 02	Control	Feces	3	31.3911	DH_20_013	GF	WT	7.05411e+10	100.2
585A	WITS 02	Control	Cecum	3	15.9073	DH_20_013	GF	WT	1.20043e+10	264.38
585A	WITS 11	Control	Feces	0	30.2564	DH_20_013	GF	WT	8.72727e+10	757.576
585A	WITS 11	Control	Feces	3	35.8529	DH_20_013	GF	WT	7.05411e+10	100.2
585A	WITS 11	Control	Cecum	3	18.6502	DH_20_013	GF	WT	1.20043e+10	264.38
585A	WITS 17	Control	Feces	0	32.3082	DH_20_013	GF	WT	8.72727e+10	757.576
585A	WITS 17	Control	Feces	3	37.905	DH_20_013	GF	WT	7.05411e+10	100.2
585A	WITS 17	Control	Cecum	3	15.5469	DH_20_013	GF	WT	1.20043e+10	264.38
585A	WITS 19	Control	Feces	0	15.5068	DH_20_013	GF	WT	8.72727e+10	757.576
585A	WITS 19	Control	Feces	3	16.0955	DH_20_013	GF	WT	7.05411e+10	100.2
585A	WITS 19	Control	Cecum	3	14.7654	DH_20_013	GF	WT	1.20043e+10	264.38
585A	WITS 21	Control	Feces	0	12.1399	DH_20_013	GF	WT	8.72727e+10	757.576
585A	WITS 21	Control	Feces	3	37.7103	DH_20_013	GF	WT	7.05411e+10	100.2
585A	WITS 21	Control	Cecum	3	14.5828	DH_20_013	GF	WT	1.20043e+10	264.38
586A	WITS 01	Control	Feces	0	31.2975	DH_20_013	GF	WT	7.23164e+10	753.296
586A	WITS 01	Control	Feces	3	16.4446	DH_20_013	GF	WT	7.79661e+10	847.458
586A	WITS 01	Control	Cecum	3	18.7557	DH_20_013	GF	WT	1.36364e+10	275.213
586A	WITS 02	Control	Feces	0	16.1808	DH_20_013	GF	WT	7.23164e+10	753.296
586A	WITS 02	Control	Feces	3	33.6137	DH_20_013	GF	WT	7.79661e+10	847.458
586A	WITS 02	Control	Cecum	3	18.4949	DH_20_013	GF	WT	1.36364e+10	275.213
586A	WITS 11	Control	Feces	0	14.2414	DH_20_013	GF	WT	7.23164e+10	753.296
586A	WITS 11	Control	Feces	3	15.7195	DH_20_013	GF	WT	7.79661e+10	847.458
586A	WITS 11	Control	Cecum	3	12.8202	DH_20_013	GF	WT	1.36364e+10	275.213
586A	WITS 17	Control	Feces	0	33.0106	DH_20_013	GF	WT	7.23164e+10	753.296
586A	WITS 17	Control	Feces	3	18.5228	DH_20_013	GF	WT	7.79661e+10	847.458
586A	WITS 17	Control	Cecum	3	18.0322	DH_20_013	GF	WT	1.36364e+10	275.213
586A	WITS 19	Control	Feces	0	15.6137	DH_20_013	GF	WT	7.23164e+10	753.296
586A	WITS 19	Control	Feces	3	17.475	DH_20_013	GF	WT	7.79661e+10	847.458
586A	WITS 19	Control	Cecum	3	16.5966	DH_20_013	GF	WT	1.36364e+10	275.213
586A	WITS 21	Control	Feces	0	14.2994	DH_20_013	GF	WT	7.23164e+10	753.296
586A	WITS 21	Control	Feces	3	18.1724	DH_20_013	GF	WT	7.79661e+10	847.458
586A	WITS 21	Control	Cecum	3	15.144	DH_20_013	GF	WT	1.36364e+10	275.213
277A	WITS 02	HFD	Feces	0	31.76	DH_19_041	GF	WT	1.77778e+11	52222.2
277A	WITS 02	HFD	Cecum	3	30.4055	DH_19_041	GF	WT	1.22807e+11	23391.8
277A	WITS 02	HFD	Feces	3	29.0425	DH_19_041	GF	WT	3.33333e+10	16666.7
416A	WITS 17	HFD	Feces	3	34.6115	DH_20_002	GF	WT	3.76471e+11	1960.78
277A	WITS 01	HFD	Feces	0	17.4825	DH_19_041	GF	WT	1.77778e+11	52222.2
277A	WITS 11	HFD	Feces	0	12.3985	DH_19_041	GF	WT	1.77778e+11	52222.2
277A	WITS 17	HFD	Feces	0	11.3195	DH_19_041	GF	WT	1.77778e+11	52222.2
277A	WITS 19	HFD	Feces	0	17.9855	DH_19_041	GF	WT	1.77778e+11	52222.2
277A	WITS 21	HFD	Feces	0	15.173	DH_19_041	GF	WT	1.77778e+11	52222.2
278A	WITS 01	HFD	Feces	0	15.0865	DH_19_041	GF	WT	2.34043e+11	36170.2
278A	WITS 02	HFD	Feces	0	17.002	DH_19_041	GF	WT	2.34043e+11	36170.2
278A	WITS 11	HFD	Feces	0	14.2765	DH_19_041	GF	WT	2.34043e+11	36170.2
278A	WITS 17	HFD	Feces	0	12.377	DH_19_041	GF	WT	2.34043e+11	36170.2
278A	WITS 19	HFD	Feces	0	15.007	DH_19_041	GF	WT	2.34043e+11	36170.2
278A	WITS 21	HFD	Feces	0	14.3245	DH_19_041	GF	WT	2.34043e+11	36170.2
279A	WITS 01	HFD	Feces	0	14.371	DH_19_041	GF	WT	2.67857e+11	46428.6
279A	WITS 02	HFD	Feces	0	18.268	DH_19_041	GF	WT	2.67857e+11	46428.6
279A	WITS 11	HFD	Feces	0	14.6285	DH_19_041	GF	WT	2.67857e+11	46428.6
279A	WITS 17	HFD	Feces	0	13.4925	DH_19_041	GF	WT	2.67857e+11	46428.6
279A	WITS 19	HFD	Feces	0	13.8345	DH_19_041	GF	WT	2.67857e+11	46428.6
279A	WITS 21	HFD	Feces	0	12.465	DH_19_041	GF	WT	2.67857e+11	46428.6
280A	WITS 01	HFD	Feces	0	14.414	DH_19_041	GF	WT	3.06122e+11	21428.6
280A	WITS 02	HFD	Feces	0	15.5815	DH_19_041	GF	WT	3.06122e+11	21428.6
280A	WITS 11	HFD	Feces	0	12.9285	DH_19_041	GF	WT	3.06122e+11	21428.6
280A	WITS 17	HFD	Feces	0	13.563	DH_19_041	GF	WT	3.06122e+11	21428.6
280A	WITS 19	HFD	Feces	0	14.9085	DH_19_041	GF	WT	3.06122e+11	21428.6
280A	WITS 21	HFD	Feces	0	12.7185	DH_19_041	GF	WT	3.06122e+11	21428.6
281A	WITS 01	HFD	Feces	0	14.8115	DH_19_041	GF	WT	1.44444e+11	16666.7
281A	WITS 02	HFD	Feces	0	17.561	DH_19_041	GF	WT	1.44444e+11	16666.7
281A	WITS 11	HFD	Feces	0	12.34	DH_19_041	GF	WT	1.44444e+11	16666.7
281A	WITS 17	HFD	Feces	0	15.1725	DH_19_041	GF	WT	1.44444e+11	16666.7
281A	WITS 19	HFD	Feces	0	14.71	DH_19_041	GF	WT	1.44444e+11	16666.7
281A	WITS 21	HFD	Feces	0	12.461	DH_19_041	GF	WT	1.44444e+11	16666.7
277A	WITS 01	HFD	Cecum	3	15.621	DH_19_041	GF	WT	1.22807e+11	23391.8
277A	WITS 11	HFD	Cecum	3	15.309	DH_19_041	GF	WT	1.22807e+11	23391.8
277A	WITS 17	HFD	Cecum	3	13.4525	DH_19_041	GF	WT	1.22807e+11	23391.8
277A	WITS 19	HFD	Cecum	3	18.976	DH_19_041	GF	WT	1.22807e+11	23391.8
277A	WITS 21	HFD	Cecum	3	17.5475	DH_19_041	GF	WT	1.22807e+11	23391.8
278A	WITS 01	HFD	Cecum	3	16.62	DH_19_041	GF	WT	3.8961e+10	8311.69
278A	WITS 02	HFD	Cecum	3	18.356	DH_19_041	GF	WT	3.8961e+10	8311.69
278A	WITS 11	HFD	Cecum	3	15.5935	DH_19_041	GF	WT	3.8961e+10	8311.69
278A	WITS 17	HFD	Cecum	3	13.0525	DH_19_041	GF	WT	3.8961e+10	8311.69
278A	WITS 19	HFD	Cecum	3	15.617	DH_19_041	GF	WT	3.8961e+10	8311.69
278A	WITS 21	HFD	Cecum	3	15.713	DH_19_041	GF	WT	3.8961e+10	8311.69
279A	WITS 01	HFD	Cecum	3	15.4665	DH_19_041	GF	WT	3.78251e+10	9456.26
279A	WITS 02	HFD	Cecum	3	21.0355	DH_19_041	GF	WT	3.78251e+10	9456.26
279A	WITS 11	HFD	Cecum	3	16.8135	DH_19_041	GF	WT	3.78251e+10	9456.26
279A	WITS 17	HFD	Cecum	3	15.562	DH_19_041	GF	WT	3.78251e+10	9456.26
279A	WITS 19	HFD	Cecum	3	16.111	DH_19_041	GF	WT	3.78251e+10	9456.26
279A	WITS 21	HFD	Cecum	3	13.3935	DH_19_041	GF	WT	3.78251e+10	9456.26
280A	WITS 01	HFD	Cecum	3	17.296	DH_19_041	GF	WT	2.37113e+11	6958.76
280A	WITS 02	HFD	Cecum	3	18.6135	DH_19_041	GF	WT	2.37113e+11	6958.76
280A	WITS 11	HFD	Cecum	3	15.0065	DH_19_041	GF	WT	2.37113e+11	6958.76
280A	WITS 17	HFD	Cecum	3	15.991	DH_19_041	GF	WT	2.37113e+11	6958.76
280A	WITS 19	HFD	Cecum	3	16.184	DH_19_041	GF	WT	2.37113e+11	6958.76
280A	WITS 21	HFD	Cecum	3	14.6475	DH_19_041	GF	WT	2.37113e+11	6958.76
281A	WITS 01	HFD	Cecum	3	16.1205	DH_19_041	GF	WT	4.24528e+10	33018.9
281A	WITS 02	HFD	Cecum	3	18.799	DH_19_041	GF	WT	4.24528e+10	33018.9
281A	WITS 11	HFD	Cecum	3	14.624	DH_19_041	GF	WT	4.24528e+10	33018.9
281A	WITS 17	HFD	Cecum	3	16.773	DH_19_041	GF	WT	4.24528e+10	33018.9
281A	WITS 19	HFD	Cecum	3	16.4285	DH_19_041	GF	WT	4.24528e+10	33018.9
281A	WITS 21	HFD	Cecum	3	13.6595	DH_19_041	GF	WT	4.24528e+10	33018.9
277A	WITS 01	HFD	Feces	3	16.488	DH_19_041	GF	WT	3.33333e+10	16666.7
277A	WITS 11	HFD	Feces	3	16.5245	DH_19_041	GF	WT	3.33333e+10	16666.7
277A	WITS 17	HFD	Feces	3	13.529	DH_19_041	GF	WT	3.33333e+10	16666.7
277A	WITS 19	HFD	Feces	3	18.3115	DH_19_041	GF	WT	3.33333e+10	16666.7
277A	WITS 21	HFD	Feces	3	16.228	DH_19_041	GF	WT	3.33333e+10	16666.7
278A	WITS 01	HFD	Feces	3	17.984	DH_19_041	GF	WT	37500000000	35000
278A	WITS 02	HFD	Feces	3	22.2315	DH_19_041	GF	WT	37500000000	35000
278A	WITS 11	HFD	Feces	3	15.8105	DH_19_041	GF	WT	37500000000	35000
278A	WITS 17	HFD	Feces	3	12.8495	DH_19_041	GF	WT	37500000000	35000
278A	WITS 19	HFD	Feces	3	17.1635	DH_19_041	GF	WT	37500000000	35000
278A	WITS 21	HFD	Feces	3	16.975	DH_19_041	GF	WT	37500000000	35000
279A	WITS 01	HFD	Feces	3	16.278	DH_19_041	GF	WT	1.70455e+11	35227.3
279A	WITS 02	HFD	Feces	3	24.1275	DH_19_041	GF	WT	1.70455e+11	35227.3
279A	WITS 11	HFD	Feces	3	19.413	DH_19_041	GF	WT	1.70455e+11	35227.3
279A	WITS 17	HFD	Feces	3	17.134	DH_19_041	GF	WT	1.70455e+11	35227.3
279A	WITS 19	HFD	Feces	3	16.4105	DH_19_041	GF	WT	1.70455e+11	35227.3
279A	WITS 21	HFD	Feces	3	14.2755	DH_19_041	GF	WT	1.70455e+11	35227.3
280A	WITS 01	HFD	Feces	3	19.129	DH_19_041	GF	WT	8.69565e+10	8695.65
280A	WITS 02	HFD	Feces	3	22.6085	DH_19_041	GF	WT	8.69565e+10	8695.65
280A	WITS 11	HFD	Feces	3	16.093	DH_19_041	GF	WT	8.69565e+10	8695.65
280A	WITS 17	HFD	Feces	3	19.081	DH_19_041	GF	WT	8.69565e+10	8695.65
280A	WITS 19	HFD	Feces	3	18.7715	DH_19_041	GF	WT	8.69565e+10	8695.65
280A	WITS 21	HFD	Feces	3	15.8525	DH_19_041	GF	WT	8.69565e+10	8695.65
281A	WITS 01	HFD	Feces	3	19.493	DH_19_041	GF	WT	2.94118e+10	19117.6
281A	WITS 02	HFD	Feces	3	26.4325	DH_19_041	GF	WT	2.94118e+10	19117.6
281A	WITS 11	HFD	Feces	3	15.3275	DH_19_041	GF	WT	2.94118e+10	19117.6
281A	WITS 17	HFD	Feces	3	18.6095	DH_19_041	GF	WT	2.94118e+10	19117.6
281A	WITS 19	HFD	Feces	3	18.929	DH_19_041	GF	WT	2.94118e+10	19117.6
281A	WITS 21	HFD	Feces	3	15.69	DH_19_041	GF	WT	2.94118e+10	19117.6
416A	WITS 01	HFD	Feces	0	15.558	DH_20_002	GF	WT	3.24638e+11	6521.74
416A	WITS 02	HFD	Feces	0	14.215	DH_20_002	GF	WT	3.24638e+11	6521.74
416A	WITS 11	HFD	Feces	0	14.3625	DH_20_002	GF	WT	3.24638e+11	6521.74
416A	WITS 17	HFD	Feces	0	18.9345	DH_20_002	GF	WT	3.24638e+11	6521.74
416A	WITS 19	HFD	Feces	0	15.6345	DH_20_002	GF	WT	3.24638e+11	6521.74
416A	WITS 21	HFD	Feces	0	14.4605	DH_20_002	GF	WT	3.24638e+11	6521.74
417A	WITS 01	HFD	Feces	0	14.1625	DH_20_002	GF	WT	4.47312e+11	8602.15
417A	WITS 02	HFD	Feces	0	16.048	DH_20_002	GF	WT	4.47312e+11	8602.15
417A	WITS 11	HFD	Feces	0	13.939	DH_20_002	GF	WT	4.47312e+11	8602.15
417A	WITS 17	HFD	Feces	0	16.962	DH_20_002	GF	WT	4.47312e+11	8602.15
417A	WITS 19	HFD	Feces	0	12.3625	DH_20_002	GF	WT	4.47312e+11	8602.15
417A	WITS 21	HFD	Feces	0	13.013	DH_20_002	GF	WT	4.47312e+11	8602.15
418A	WITS 01	HFD	Feces	0	13.6705	DH_20_002	GF	WT	7.58763e+11	11855.7
418A	WITS 02	HFD	Feces	0	14.541	DH_20_002	GF	WT	7.58763e+11	11855.7
418A	WITS 11	HFD	Feces	0	12.7695	DH_20_002	GF	WT	7.58763e+11	11855.7
418A	WITS 17	HFD	Feces	0	18.523	DH_20_002	GF	WT	7.58763e+11	11855.7
418A	WITS 19	HFD	Feces	0	14.822	DH_20_002	GF	WT	7.58763e+11	11855.7
418A	WITS 21	HFD	Feces	0	13.209	DH_20_002	GF	WT	7.58763e+11	11855.7
416A	WITS 01	HFD	Feces	3	16.0455	DH_20_002	GF	WT	3.76471e+11	1960.78
416A	WITS 02	HFD	Feces	3	14.7845	DH_20_002	GF	WT	3.76471e+11	1960.78
416A	WITS 11	HFD	Feces	3	14.767	DH_20_002	GF	WT	3.76471e+11	1960.78
416A	WITS 19	HFD	Feces	3	13.595	DH_20_002	GF	WT	3.76471e+11	1960.78
416A	WITS 21	HFD	Feces	3	12.947	DH_20_002	GF	WT	3.76471e+11	1960.78
417A	WITS 01	HFD	Feces	3	13.5305	DH_20_002	GF	WT	2.03175e+11	2698.41
417A	WITS 02	HFD	Feces	3	18.459	DH_20_002	GF	WT	2.03175e+11	2698.41
417A	WITS 11	HFD	Feces	3	15.015	DH_20_002	GF	WT	2.03175e+11	2698.41
417A	WITS 17	HFD	Feces	3	16.2635	DH_20_002	GF	WT	2.03175e+11	2698.41
417A	WITS 19	HFD	Feces	3	12.9265	DH_20_002	GF	WT	2.03175e+11	2698.41
417A	WITS 21	HFD	Feces	3	13.402	DH_20_002	GF	WT	2.03175e+11	2698.41
418A	WITS 01	HFD	Feces	3	13.6845	DH_20_002	GF	WT	120000000000	11250
418A	WITS 02	HFD	Feces	3	14.6425	DH_20_002	GF	WT	120000000000	11250
418A	WITS 11	HFD	Feces	3	13.3355	DH_20_002	GF	WT	120000000000	11250
418A	WITS 17	HFD	Feces	3	17.3455	DH_20_002	GF	WT	120000000000	11250
418A	WITS 19	HFD	Feces	3	14.9645	DH_20_002	GF	WT	120000000000	11250
418A	WITS 21	HFD	Feces	3	13.955	DH_20_002	GF	WT	120000000000	11250
416A	WITS 01	HFD	Cecum	3	14.715	DH_20_002	GF	WT	9.55224e+10	3233.83
416A	WITS 02	HFD	Cecum	3	15.2845	DH_20_002	GF	WT	9.55224e+10	3233.83
416A	WITS 11	HFD	Cecum	3	14.5165	DH_20_002	GF	WT	9.55224e+10	3233.83
416A	WITS 17	HFD	Cecum	3	18.005	DH_20_002	GF	WT	9.55224e+10	3233.83
416A	WITS 19	HFD	Cecum	3	13.374	DH_20_002	GF	WT	9.55224e+10	3233.83
416A	WITS 21	HFD	Cecum	3	13.591	DH_20_002	GF	WT	9.55224e+10	3233.83
417A	WITS 01	HFD	Cecum	3	14.2345	DH_20_002	GF	WT	4.6519e+11	5063.29
417A	WITS 02	HFD	Cecum	3	18.6215	DH_20_002	GF	WT	4.6519e+11	5063.29
417A	WITS 11	HFD	Cecum	3	14.071	DH_20_002	GF	WT	4.6519e+11	5063.29
417A	WITS 17	HFD	Cecum	3	15.9095	DH_20_002	GF	WT	4.6519e+11	5063.29
417A	WITS 19	HFD	Cecum	3	12.979	DH_20_002	GF	WT	4.6519e+11	5063.29
417A	WITS 21	HFD	Cecum	3	12.894	DH_20_002	GF	WT	4.6519e+11	5063.29
418A	WITS 01	HFD	Cecum	3	14.4265	DH_20_002	GF	WT	1.63483e+12	7022.47
418A	WITS 02	HFD	Cecum	3	16.0175	DH_20_002	GF	WT	1.63483e+12	7022.47
418A	WITS 11	HFD	Cecum	3	13.993	DH_20_002	GF	WT	1.63483e+12	7022.47
418A	WITS 17	HFD	Cecum	3	20.578	DH_20_002	GF	WT	1.63483e+12	7022.47
418A	WITS 19	HFD	Cecum	3	15.0935	DH_20_002	GF	WT	1.63483e+12	7022.47
418A	WITS 21	HFD	Cecum	3	13.2615	DH_20_002	GF	WT	1.63483e+12	7022.47
587A	WITS 01	HFD	Feces	0	13.0106	DH_20_013	GF	WT	5.73003e+10	1205.23
587A	WITS 01	HFD	Feces	3	17.0985	DH_20_013	GF	WT	3.72093e+10	581.395
587A	WITS 01	HFD	Cecum	3	15.6264	DH_20_013	GF	WT	1.27848e+10	393.608
587A	WITS 02	HFD	Feces	0	15.4615	DH_20_013	GF	WT	5.73003e+10	1205.23
587A	WITS 02	HFD	Feces	3	17.3146	DH_20_013	GF	WT	3.72093e+10	581.395
587A	WITS 02	HFD	Cecum	3	14.3016	DH_20_013	GF	WT	1.27848e+10	393.608
587A	WITS 11	HFD	Feces	0	14.3275	DH_20_013	GF	WT	5.73003e+10	1205.23
587A	WITS 11	HFD	Feces	3	15.0791	DH_20_013	GF	WT	3.72093e+10	581.395
587A	WITS 11	HFD	Cecum	3	14.3766	DH_20_013	GF	WT	1.27848e+10	393.608
587A	WITS 17	HFD	Feces	0	14.9606	DH_20_013	GF	WT	5.73003e+10	1205.23
587A	WITS 17	HFD	Feces	3	36.1778	DH_20_013	GF	WT	3.72093e+10	581.395
587A	WITS 17	HFD	Cecum	3	18.5557	DH_20_013	GF	WT	1.27848e+10	393.608
587A	WITS 19	HFD	Feces	0	14.1432	DH_20_013	GF	WT	5.73003e+10	1205.23
587A	WITS 19	HFD	Feces	3	17.1625	DH_20_013	GF	WT	3.72093e+10	581.395
587A	WITS 19	HFD	Cecum	3	15.3475	DH_20_013	GF	WT	1.27848e+10	393.608
587A	WITS 21	HFD	Feces	0	14.157	DH_20_013	GF	WT	5.73003e+10	1205.23
587A	WITS 21	HFD	Feces	3	17.2651	DH_20_013	GF	WT	3.72093e+10	581.395
587A	WITS 21	HFD	Cecum	3	16.6369	DH_20_013	GF	WT	1.27848e+10	393.608
588A	WITS 01	HFD	Feces	0	15.0448	DH_20_013	GF	WT	7.22581e+10	870.968
588A	WITS 01	HFD	Feces	3	34.2149	DH_20_013	GF	WT	4.37607e+10	341.88
588A	WITS 01	HFD	Cecum	3	15.9436	DH_20_013	GF	WT	1.38541e+10	246.296
588A	WITS 02	HFD	Feces	0	13.7356	DH_20_013	GF	WT	7.22581e+10	870.968
588A	WITS 02	HFD	Feces	3	17.275	DH_20_013	GF	WT	4.37607e+10	341.88
588A	WITS 02	HFD	Cecum	3	15.4644	DH_20_013	GF	WT	1.38541e+10	246.296
588A	WITS 11	HFD	Feces	0	15.6777	DH_20_013	GF	WT	7.22581e+10	870.968
588A	WITS 11	HFD	Feces	3	37.9214	DH_20_013	GF	WT	4.37607e+10	341.88
588A	WITS 11	HFD	Cecum	3	16.6515	DH_20_013	GF	WT	1.38541e+10	246.296
588A	WITS 17	HFD	Feces	0	15.5445	DH_20_013	GF	WT	7.22581e+10	870.968
588A	WITS 17	HFD	Feces	3	17.9354	DH_20_013	GF	WT	4.37607e+10	341.88
588A	WITS 17	HFD	Cecum	3	16.4495	DH_20_013	GF	WT	1.38541e+10	246.296
588A	WITS 19	HFD	Feces	0	12.5995	DH_20_013	GF	WT	7.22581e+10	870.968
588A	WITS 19	HFD	Feces	3	17.4062	DH_20_013	GF	WT	4.37607e+10	341.88
588A	WITS 19	HFD	Cecum	3	15.3263	DH_20_013	GF	WT	1.38541e+10	246.296
588A	WITS 21	HFD	Feces	0	14.1219	DH_20_013	GF	WT	7.22581e+10	870.968
588A	WITS 21	HFD	Feces	3	15.5196	DH_20_013	GF	WT	4.37607e+10	341.88
588A	WITS 21	HFD	Cecum	3	14.9184	DH_20_013	GF	WT	1.38541e+10	246.296
589A	WITS 01	HFD	Feces	0	31.4579	DH_20_013	GF	WT	7.15294e+10	529.412
589A	WITS 01	HFD	Feces	3	16.9011	DH_20_013	GF	WT	7.90514e+10	642.292
589A	WITS 01	HFD	Cecum	3	15.0397	DH_20_013	GF	WT	2.44492e+10	383.795
589A	WITS 02	HFD	Feces	0	15.1622	DH_20_013	GF	WT	7.15294e+10	529.412
589A	WITS 02	HFD	Feces	3	33.7913	DH_20_013	GF	WT	7.90514e+10	642.292
589A	WITS 02	HFD	Cecum	3	16.5684	DH_20_013	GF	WT	2.44492e+10	383.795
589A	WITS 11	HFD	Feces	0	13.6827	DH_20_013	GF	WT	7.15294e+10	529.412
589A	WITS 11	HFD	Feces	3	15.6002	DH_20_013	GF	WT	7.90514e+10	642.292
589A	WITS 11	HFD	Cecum	3	14.0966	DH_20_013	GF	WT	2.44492e+10	383.795
589A	WITS 17	HFD	Feces	0	15.1301	DH_20_013	GF	WT	7.15294e+10	529.412
589A	WITS 17	HFD	Feces	3	36.8179	DH_20_013	GF	WT	7.90514e+10	642.292
589A	WITS 17	HFD	Cecum	3	17.6643	DH_20_013	GF	WT	2.44492e+10	383.795
589A	WITS 19	HFD	Feces	0	13.8268	DH_20_013	GF	WT	7.15294e+10	529.412
589A	WITS 19	HFD	Feces	3	17.7246	DH_20_013	GF	WT	7.90514e+10	642.292
589A	WITS 19	HFD	Cecum	3	15.0201	DH_20_013	GF	WT	2.44492e+10	383.795
589A	WITS 21	HFD	Feces	0	14.5478	DH_20_013	GF	WT	7.15294e+10	529.412
589A	WITS 21	HFD	Feces	3	17.2106	DH_20_013	GF	WT	7.90514e+10	642.292
589A	WITS 21	HFD	Cecum	3	13.9968	DH_20_013	GF	WT	2.44492e+10	383.795
590A	WITS 01	HFD	Feces	0	13.0687	DH_20_013	GF	WT	1.50943e+11	2594.34
590A	WITS 01	HFD	Feces	3	16.6434	DH_20_013	GF	WT	4.26938e+10	1435.83
590A	WITS 01	HFD	Cecum	3	15.0752	DH_20_013	GF	WT	2.31297e+10	661.366
590A	WITS 02	HFD	Feces	0	14.0768	DH_20_013	GF	WT	1.50943e+11	2594.34
590A	WITS 02	HFD	Feces	3	18.9278	DH_20_013	GF	WT	4.26938e+10	1435.83
590A	WITS 02	HFD	Cecum	3	14.4053	DH_20_013	GF	WT	2.31297e+10	661.366
590A	WITS 11	HFD	Feces	0	13.6016	DH_20_013	GF	WT	1.50943e+11	2594.34
590A	WITS 11	HFD	Feces	3	17.9296	DH_20_013	GF	WT	4.26938e+10	1435.83
590A	WITS 11	HFD	Cecum	3	14.3446	DH_20_013	GF	WT	2.31297e+10	661.366
590A	WITS 17	HFD	Feces	0	17.309	DH_20_013	GF	WT	1.50943e+11	2594.34
590A	WITS 17	HFD	Feces	3	18.203	DH_20_013	GF	WT	4.26938e+10	1435.83
590A	WITS 17	HFD	Cecum	3	16.773	DH_20_013	GF	WT	2.31297e+10	661.366
590A	WITS 19	HFD	Feces	0	15.1363	DH_20_013	GF	WT	1.50943e+11	2594.34
590A	WITS 19	HFD	Feces	3	20.3197	DH_20_013	GF	WT	4.26938e+10	1435.83
590A	WITS 19	HFD	Cecum	3	16.9207	DH_20_013	GF	WT	2.31297e+10	661.366
590A	WITS 21	HFD	Feces	0	14.1207	DH_20_013	GF	WT	1.50943e+11	2594.34
590A	WITS 21	HFD	Feces	3	16.8005	DH_20_013	GF	WT	4.26938e+10	1435.83
590A	WITS 21	HFD	Cecum	3	15.1069	DH_20_013	GF	WT	2.31297e+10	661.366
591A	WITS 01	HFD	Feces	0	16.6311	DH_20_013	GF	WT	3.33333e+10	737.847
591A	WITS 01	HFD	Feces	3	35.4662	DH_20_013	GF	WT	2.83186e+10	619.469
591A	WITS 01	HFD	Cecum	3	15.331	DH_20_013	GF	WT	2.14018e+10	436.062
591A	WITS 02	HFD	Feces	0	14.0825	DH_20_013	GF	WT	3.33333e+10	737.847
591A	WITS 02	HFD	Feces	3	18.2651	DH_20_013	GF	WT	2.83186e+10	619.469
591A	WITS 02	HFD	Cecum	3	14.8543	DH_20_013	GF	WT	2.14018e+10	436.062
591A	WITS 11	HFD	Feces	0	13.0835	DH_20_013	GF	WT	3.33333e+10	737.847
591A	WITS 11	HFD	Feces	3	15.0138	DH_20_013	GF	WT	2.83186e+10	619.469
591A	WITS 11	HFD	Cecum	3	13.7524	DH_20_013	GF	WT	2.14018e+10	436.062
591A	WITS 17	HFD	Feces	0	15.9028	DH_20_013	GF	WT	3.33333e+10	737.847
591A	WITS 17	HFD	Feces	3	20.0917	DH_20_013	GF	WT	2.83186e+10	619.469
591A	WITS 17	HFD	Cecum	3	15.5635	DH_20_013	GF	WT	2.14018e+10	436.062
591A	WITS 19	HFD	Feces	0	14.3242	DH_20_013	GF	WT	3.33333e+10	737.847
591A	WITS 19	HFD	Feces	3	34.4314	DH_20_013	GF	WT	2.83186e+10	619.469
591A	WITS 19	HFD	Cecum	3	15.2313	DH_20_013	GF	WT	2.14018e+10	436.062
591A	WITS 21	HFD	Feces	0	15.0299	DH_20_013	GF	WT	3.33333e+10	737.847
591A	WITS 21	HFD	Feces	3	16.7964	DH_20_013	GF	WT	2.83186e+10	619.469
591A	WITS 21	HFD	Cecum	3	18.6169	DH_20_013	GF	WT	2.14018e+10	436.062
419A	WITS 01	Stm attenuated	Feces	0	13.2075	DH_20_002	GF	WT	7.02439e+11	21951.2
419A	WITS 02	Stm attenuated	Feces	0	15.2465	DH_20_002	GF	WT	7.02439e+11	21951.2
419A	WITS 11	Stm attenuated	Feces	0	13.4865	DH_20_002	GF	WT	7.02439e+11	21951.2
419A	WITS 17	Stm attenuated	Feces	0	17.836	DH_20_002	GF	WT	7.02439e+11	21951.2
419A	WITS 19	Stm attenuated	Feces	0	14.8335	DH_20_002	GF	WT	7.02439e+11	21951.2
419A	WITS 21	Stm attenuated	Feces	0	13.72	DH_20_002	GF	WT	7.02439e+11	21951.2
420A	WITS 01	Stm attenuated	Feces	0	15.1305	DH_20_002	GF	WT	4.11429e+11	7142.86
420A	WITS 02	Stm attenuated	Feces	0	15.8615	DH_20_002	GF	WT	4.11429e+11	7142.86
420A	WITS 11	Stm attenuated	Feces	0	15.5925	DH_20_002	GF	WT	4.11429e+11	7142.86
420A	WITS 17	Stm attenuated	Feces	0	16.9105	DH_20_002	GF	WT	4.11429e+11	7142.86
420A	WITS 19	Stm attenuated	Feces	0	12.5265	DH_20_002	GF	WT	4.11429e+11	7142.86
420A	WITS 21	Stm attenuated	Feces	0	12.3655	DH_20_002	GF	WT	4.11429e+11	7142.86
421A	WITS 01	Stm attenuated	Feces	0	15.4235	DH_20_002	GF	WT	4.57143e+11	21428.6
421A	WITS 02	Stm attenuated	Feces	0	16.7845	DH_20_002	GF	WT	4.57143e+11	21428.6
421A	WITS 11	Stm attenuated	Feces	0	13.999	DH_20_002	GF	WT	4.57143e+11	21428.6
421A	WITS 17	Stm attenuated	Feces	0	16.477	DH_20_002	GF	WT	4.57143e+11	21428.6
421A	WITS 19	Stm attenuated	Feces	0	12.9705	DH_20_002	GF	WT	4.57143e+11	21428.6
421A	WITS 21	Stm attenuated	Feces	0	12.303	DH_20_002	GF	WT	4.57143e+11	21428.6
419A	WITS 01	Stm attenuated	Feces	3	12.4195	DH_20_002	GF	WT	1.01818e+11	3181.82
419A	WITS 02	Stm attenuated	Feces	3	33.593	DH_20_002	GF	WT	1.01818e+11	3181.82
419A	WITS 11	Stm attenuated	Feces	3	30.916	DH_20_002	GF	WT	1.01818e+11	3181.82
419A	WITS 17	Stm attenuated	Feces	3	14.218	DH_20_002	GF	WT	1.01818e+11	3181.82
419A	WITS 19	Stm attenuated	Feces	3	13.3825	DH_20_002	GF	WT	1.01818e+11	3181.82
419A	WITS 21	Stm attenuated	Feces	3	30.533	DH_20_002	GF	WT	1.01818e+11	3181.82
419A	WITS 01	Stm attenuated	Cecum	3	13.9455	DH_20_002	GF	WT	3.77005e+11	1604.28
419A	WITS 02	Stm attenuated	Cecum	3	15.913	DH_20_002	GF	WT	3.77005e+11	1604.28
419A	WITS 11	Stm attenuated	Cecum	3	13.588	DH_20_002	GF	WT	3.77005e+11	1604.28
419A	WITS 17	Stm attenuated	Cecum	3	17.9205	DH_20_002	GF	WT	3.77005e+11	1604.28
419A	WITS 19	Stm attenuated	Cecum	3	14.482	DH_20_002	GF	WT	3.77005e+11	1604.28
419A	WITS 21	Stm attenuated	Cecum	3	13.0775	DH_20_002	GF	WT	3.77005e+11	1604.28
420A	WITS 01	Stm attenuated	Feces	3	34.206	DH_20_002	GF	WT	3.52941e+09	0
420A	WITS 02	Stm attenuated	Feces	3	35.9415	DH_20_002	GF	WT	3.52941e+09	0
420A	WITS 11	Stm attenuated	Feces	3	35.1315	DH_20_002	GF	WT	3.52941e+09	0
420A	WITS 17	Stm attenuated	Feces	3	35.571	DH_20_002	GF	WT	3.52941e+09	0
420A	WITS 19	Stm attenuated	Feces	3	32.7955	DH_20_002	GF	WT	3.52941e+09	0
420A	WITS 21	Stm attenuated	Feces	3	32.6455	DH_20_002	GF	WT	3.52941e+09	0
421A	WITS 01	Stm attenuated	Feces	3	31.435	DH_20_002	GF	WT	1.93103e+09	0
421A	WITS 02	Stm attenuated	Feces	3	34.2855	DH_20_002	GF	WT	1.93103e+09	0
421A	WITS 11	Stm attenuated	Feces	3	34.8225	DH_20_002	GF	WT	1.93103e+09	0
421A	WITS 17	Stm attenuated	Feces	3	34.199	DH_20_002	GF	WT	1.93103e+09	0
421A	WITS 19	Stm attenuated	Feces	3	32.3555	DH_20_002	GF	WT	1.93103e+09	0
421A	WITS 21	Stm attenuated	Feces	3	32.2015	DH_20_002	GF	WT	1.93103e+09	0
420A	WITS 01	Stm attenuated	Cecum	3	15.684	DH_20_002	GF	WT	4.47552e+10	792.541
420A	WITS 02	Stm attenuated	Cecum	3	19.314	DH_20_002	GF	WT	4.47552e+10	792.541
420A	WITS 11	Stm attenuated	Cecum	3	15.7835	DH_20_002	GF	WT	4.47552e+10	792.541
420A	WITS 17	Stm attenuated	Cecum	3	15.294	DH_20_002	GF	WT	4.47552e+10	792.541
420A	WITS 19	Stm attenuated	Cecum	3	14.1205	DH_20_002	GF	WT	4.47552e+10	792.541
420A	WITS 21	Stm attenuated	Cecum	3	13.3785	DH_20_002	GF	WT	4.47552e+10	792.541
421A	WITS 01	Stm attenuated	Cecum	3	14.8735	DH_20_002	GF	WT	1.05495e+11	329.67
421A	WITS 02	Stm attenuated	Cecum	3	33.6435	DH_20_002	GF	WT	1.05495e+11	329.67
421A	WITS 11	Stm attenuated	Cecum	3	34.8805	DH_20_002	GF	WT	1.05495e+11	329.67
421A	WITS 17	Stm attenuated	Cecum	3	33.8275	DH_20_002	GF	WT	1.05495e+11	329.67
421A	WITS 19	Stm attenuated	Cecum	3	32.4715	DH_20_002	GF	WT	1.05495e+11	329.67
421A	WITS 21	Stm attenuated	Cecum	3	12.729	DH_20_002	GF	WT	1.05495e+11	329.67
798A	WITS 01	Stm attenuated	Cecum	3	18.834	DH_20_021	GF	WT	7.20721e+09	64.3501
798A	WITS 02	Stm attenuated	Cecum	3	17.718	DH_20_021	GF	WT	7.20721e+09	64.3501
798A	WITS 11	Stm attenuated	Cecum	3	16.431	DH_20_021	GF	WT	7.20721e+09	64.3501
798A	WITS 17	Stm attenuated	Cecum	3	34.9985	DH_20_021	GF	WT	7.20721e+09	64.3501
798A	WITS 19	Stm attenuated	Cecum	3	21.3775	DH_20_021	GF	WT	7.20721e+09	64.3501
798A	WITS 21	Stm attenuated	Cecum	3	17.852	DH_20_021	GF	WT	7.20721e+09	64.3501
799A	WITS 01	Stm attenuated	Cecum	3	21.6215	DH_20_021	GF	WT	8.51064e+09	319.149
799A	WITS 02	Stm attenuated	Cecum	3	22.0705	DH_20_021	GF	WT	8.51064e+09	319.149
799A	WITS 11	Stm attenuated	Cecum	3	16.771	DH_20_021	GF	WT	8.51064e+09	319.149
799A	WITS 17	Stm attenuated	Cecum	3	17.58	DH_20_021	GF	WT	8.51064e+09	319.149
799A	WITS 19	Stm attenuated	Cecum	3	20.671	DH_20_021	GF	WT	8.51064e+09	319.149
799A	WITS 21	Stm attenuated	Cecum	3	17.3735	DH_20_021	GF	WT	8.51064e+09	319.149
800A	WITS 01	Stm attenuated	Cecum	3	19.3875	DH_20_021	GF	WT	7.30802e+09	42.8204
800A	WITS 02	Stm attenuated	Cecum	3	21.368	DH_20_021	GF	WT	7.30802e+09	42.8204
800A	WITS 11	Stm attenuated	Cecum	3	15.965	DH_20_021	GF	WT	7.30802e+09	42.8204
800A	WITS 17	Stm attenuated	Cecum	3	20.3695	DH_20_021	GF	WT	7.30802e+09	42.8204
800A	WITS 19	Stm attenuated	Cecum	3	16.8785	DH_20_021	GF	WT	7.30802e+09	42.8204
800A	WITS 21	Stm attenuated	Cecum	3	19.8635	DH_20_021	GF	WT	7.30802e+09	42.8204
801A	WITS 01	Stm attenuated	Cecum	3	32.929	DH_20_021	GF	WT	2.78689e+09	34.153
801A	WITS 02	Stm attenuated	Cecum	3	36.367	DH_20_021	GF	WT	2.78689e+09	34.153
801A	WITS 11	Stm attenuated	Cecum	3	16.7255	DH_20_021	GF	WT	2.78689e+09	34.153
801A	WITS 17	Stm attenuated	Cecum	3	35.7235	DH_20_021	GF	WT	2.78689e+09	34.153
801A	WITS 19	Stm attenuated	Cecum	3	36.3705	DH_20_021	GF	WT	2.78689e+09	34.153
801A	WITS 21	Stm attenuated	Cecum	3	15.6935	DH_20_021	GF	WT	2.78689e+09	34.153
802A	WITS 01	Stm attenuated	Cecum	3	34.556	DH_20_021	GF	WT	2.3382e+09	0
802A	WITS 02	Stm attenuated	Cecum	3	38.246	DH_20_021	GF	WT	2.3382e+09	0
802A	WITS 11	Stm attenuated	Cecum	3	34.943	DH_20_021	GF	WT	2.3382e+09	0
802A	WITS 17	Stm attenuated	Cecum	3	36.149	DH_20_021	GF	WT	2.3382e+09	0
802A	WITS 19	Stm attenuated	Cecum	3	38.083	DH_20_021	GF	WT	2.3382e+09	0
802A	WITS 21	Stm attenuated	Cecum	3	36.29	DH_20_021	GF	WT	2.3382e+09	0
803A	WITS 01	Stm attenuated	Cecum	3	34.049	DH_20_021	GF	WT	2.39842e+09	19.7239
803A	WITS 02	Stm attenuated	Cecum	3	40	DH_20_021	GF	WT	2.39842e+09	19.7239
803A	WITS 11	Stm attenuated	Cecum	3	14.1065	DH_20_021	GF	WT	2.39842e+09	19.7239
803A	WITS 17	Stm attenuated	Cecum	3	37.609	DH_20_021	GF	WT	2.39842e+09	19.7239
803A	WITS 19	Stm attenuated	Cecum	3	36.608	DH_20_021	GF	WT	2.39842e+09	19.7239
803A	WITS 21	Stm attenuated	Cecum	3	36.574	DH_20_021	GF	WT	2.39842e+09	19.7239
798A	WITS 01	Stm attenuated	Feces	0	13.2665	DH_20_021	GF	WT	4.10256e+10	1025.64
798A	WITS 02	Stm attenuated	Feces	0	18.5365	DH_20_021	GF	WT	4.10256e+10	1025.64
798A	WITS 11	Stm attenuated	Feces	0	13.003	DH_20_021	GF	WT	4.10256e+10	1025.64
798A	WITS 17	Stm attenuated	Feces	0	35.537	DH_20_021	GF	WT	4.10256e+10	1025.64
798A	WITS 19	Stm attenuated	Feces	0	16.397	DH_20_021	GF	WT	4.10256e+10	1025.64
798A	WITS 21	Stm attenuated	Feces	0	13.708	DH_20_021	GF	WT	4.10256e+10	1025.64
799A	WITS 01	Stm attenuated	Feces	0	18.1185	DH_20_021	GF	WT	6.11236e+10	1853.93
799A	WITS 02	Stm attenuated	Feces	0	17.8075	DH_20_021	GF	WT	6.11236e+10	1853.93
799A	WITS 11	Stm attenuated	Feces	0	12.228	DH_20_021	GF	WT	6.11236e+10	1853.93
799A	WITS 17	Stm attenuated	Feces	0	16.239	DH_20_021	GF	WT	6.11236e+10	1853.93
799A	WITS 19	Stm attenuated	Feces	0	16.268	DH_20_021	GF	WT	6.11236e+10	1853.93
799A	WITS 21	Stm attenuated	Feces	0	13.7865	DH_20_021	GF	WT	6.11236e+10	1853.93
800A	WITS 01	Stm attenuated	Feces	0	14.2895	DH_20_021	GF	WT	5.53846e+10	1250
800A	WITS 02	Stm attenuated	Feces	0	20.8225	DH_20_021	GF	WT	5.53846e+10	1250
800A	WITS 11	Stm attenuated	Feces	0	12.5405	DH_20_021	GF	WT	5.53846e+10	1250
800A	WITS 17	Stm attenuated	Feces	0	35.107	DH_20_021	GF	WT	5.53846e+10	1250
800A	WITS 19	Stm attenuated	Feces	0	14.0535	DH_20_021	GF	WT	5.53846e+10	1250
800A	WITS 21	Stm attenuated	Feces	0	17.942	DH_20_021	GF	WT	5.53846e+10	1250
801A	WITS 01	Stm attenuated	Feces	0	33.598	DH_20_021	GF	WT	8.64865e+09	810.811
801A	WITS 02	Stm attenuated	Feces	0	36.6995	DH_20_021	GF	WT	8.64865e+09	810.811
801A	WITS 11	Stm attenuated	Feces	0	12.8505	DH_20_021	GF	WT	8.64865e+09	810.811
801A	WITS 17	Stm attenuated	Feces	0	17.7275	DH_20_021	GF	WT	8.64865e+09	810.811
801A	WITS 19	Stm attenuated	Feces	0	36.025	DH_20_021	GF	WT	8.64865e+09	810.811
801A	WITS 21	Stm attenuated	Feces	0	12.347	DH_20_021	GF	WT	8.64865e+09	810.811
802A	WITS 01	Stm attenuated	Feces	0	14.3015	DH_20_021	GF	WT	3.04762e+10	119.048
802A	WITS 02	Stm attenuated	Feces	0	38.4515	DH_20_021	GF	WT	3.04762e+10	119.048
802A	WITS 11	Stm attenuated	Feces	0	35.1325	DH_20_021	GF	WT	3.04762e+10	119.048
802A	WITS 17	Stm attenuated	Feces	0	37.5755	DH_20_021	GF	WT	3.04762e+10	119.048
802A	WITS 19	Stm attenuated	Feces	0	35.646	DH_20_021	GF	WT	3.04762e+10	119.048
802A	WITS 21	Stm attenuated	Feces	0	12.0675	DH_20_021	GF	WT	3.04762e+10	119.048
803A	WITS 01	Stm attenuated	Feces	0	16.1675	DH_20_021	GF	WT	4.29851e+10	597.015
803A	WITS 02	Stm attenuated	Feces	0	37.5455	DH_20_021	GF	WT	4.29851e+10	597.015
803A	WITS 11	Stm attenuated	Feces	0	13.4935	DH_20_021	GF	WT	4.29851e+10	597.015
803A	WITS 17	Stm attenuated	Feces	0	12.364	DH_20_021	GF	WT	4.29851e+10	597.015
803A	WITS 19	Stm attenuated	Feces	0	33.884	DH_20_021	GF	WT	4.29851e+10	597.015
803A	WITS 21	Stm attenuated	Feces	0	16.6125	DH_20_021	GF	WT	4.29851e+10	597.015
798A	WITS 01	Stm attenuated	Feces	3	34.599	DH_20_021	GF	WT	1.30728e+10	88.8099
798A	WITS 02	Stm attenuated	Feces	3	36.1575	DH_20_021	GF	WT	1.30728e+10	88.8099
798A	WITS 11	Stm attenuated	Feces	3	13.9745	DH_20_021	GF	WT	1.30728e+10	88.8099
798A	WITS 17	Stm attenuated	Feces	3	36.1575	DH_20_021	GF	WT	1.30728e+10	88.8099
798A	WITS 19	Stm attenuated	Feces	3	37.4745	DH_20_021	GF	WT	1.30728e+10	88.8099
798A	WITS 21	Stm attenuated	Feces	3	34.8925	DH_20_021	GF	WT	1.30728e+10	88.8099
799A	WITS 01	Stm attenuated	Feces	3	34.0905	DH_20_021	GF	WT	1.11111e+09	0
799A	WITS 02	Stm attenuated	Feces	3	40	DH_20_021	GF	WT	1.11111e+09	0
799A	WITS 11	Stm attenuated	Feces	3	33.822	DH_20_021	GF	WT	1.11111e+09	0
799A	WITS 17	Stm attenuated	Feces	3	35.537	DH_20_021	GF	WT	1.11111e+09	0
799A	WITS 19	Stm attenuated	Feces	3	36.035	DH_20_021	GF	WT	1.11111e+09	0
799A	WITS 21	Stm attenuated	Feces	3	36.0845	DH_20_021	GF	WT	1.11111e+09	0
800A	WITS 01	Stm attenuated	Feces	3	34.8535	DH_20_021	GF	WT	8.33333e+08	0
800A	WITS 02	Stm attenuated	Feces	3	37.765	DH_20_021	GF	WT	8.33333e+08	0
800A	WITS 11	Stm attenuated	Feces	3	34.432	DH_20_021	GF	WT	8.33333e+08	0
800A	WITS 17	Stm attenuated	Feces	3	36.7785	DH_20_021	GF	WT	8.33333e+08	0
800A	WITS 19	Stm attenuated	Feces	3	36.2405	DH_20_021	GF	WT	8.33333e+08	0
800A	WITS 21	Stm attenuated	Feces	3	37.2165	DH_20_021	GF	WT	8.33333e+08	0
801A	WITS 01	Stm attenuated	Feces	3	34.3155	DH_20_021	GF	WT	1.33333e+09	0
801A	WITS 02	Stm attenuated	Feces	3	36.2735	DH_20_021	GF	WT	1.33333e+09	0
801A	WITS 11	Stm attenuated	Feces	3	32.678	DH_20_021	GF	WT	1.33333e+09	0
801A	WITS 17	Stm attenuated	Feces	3	34.995	DH_20_021	GF	WT	1.33333e+09	0
801A	WITS 19	Stm attenuated	Feces	3	35.879	DH_20_021	GF	WT	1.33333e+09	0
801A	WITS 21	Stm attenuated	Feces	3	32.5585	DH_20_021	GF	WT	1.33333e+09	0
802A	WITS 01	Stm attenuated	Feces	3	35.3775	DH_20_021	GF	WT	5.01044e+08	0
802A	WITS 02	Stm attenuated	Feces	3	35.6005	DH_20_021	GF	WT	5.01044e+08	0
802A	WITS 11	Stm attenuated	Feces	3	35.6295	DH_20_021	GF	WT	5.01044e+08	0
802A	WITS 17	Stm attenuated	Feces	3	35.4515	DH_20_021	GF	WT	5.01044e+08	0
802A	WITS 19	Stm attenuated	Feces	3	36.0005	DH_20_021	GF	WT	5.01044e+08	0
802A	WITS 21	Stm attenuated	Feces	3	36.035	DH_20_021	GF	WT	5.01044e+08	0
803A	WITS 01	Stm attenuated	Feces	3	35.098	DH_20_021	GF	WT	2.96296e+09	0
803A	WITS 02	Stm attenuated	Feces	3	36.8055	DH_20_021	GF	WT	2.96296e+09	0
803A	WITS 11	Stm attenuated	Feces	3	35.197	DH_20_021	GF	WT	2.96296e+09	0
803A	WITS 17	Stm attenuated	Feces	3	35.7495	DH_20_021	GF	WT	2.96296e+09	0
803A	WITS 19	Stm attenuated	Feces	3	37.1335	DH_20_021	GF	WT	2.96296e+09	0
803A	WITS 21	Stm attenuated	Feces	3	37.0745	DH_20_021	GF	WT	2.96296e+09	0
597A	WITS 01	Stm attenuated	Feces	0	15.3189	DH_20_013	GF	WT	9.97506e+10	872.818
597A	WITS 01	Stm attenuated	Cecum	3	34.2342	DH_20_013	GF	WT	4.97869e+09	0
597A	WITS 02	Stm attenuated	Feces	0	14.2487	DH_20_013	GF	WT	9.97506e+10	872.818
597A	WITS 02	Stm attenuated	Cecum	3	32.0618	DH_20_013	GF	WT	4.97869e+09	0
597A	WITS 11	Stm attenuated	Feces	0	14.906	DH_20_013	GF	WT	9.97506e+10	872.818
597A	WITS 11	Stm attenuated	Cecum	3	33.4735	DH_20_013	GF	WT	4.97869e+09	0
597A	WITS 17	Stm attenuated	Feces	0	16.206	DH_20_013	GF	WT	9.97506e+10	872.818
597A	WITS 17	Stm attenuated	Cecum	3	33.9279	DH_20_013	GF	WT	4.97869e+09	0
597A	WITS 19	Stm attenuated	Feces	0	18.4144	DH_20_013	GF	WT	9.97506e+10	872.818
597A	WITS 19	Stm attenuated	Cecum	3	32.006	DH_20_013	GF	WT	4.97869e+09	0
597A	WITS 21	Stm attenuated	Feces	0	12.5322	DH_20_013	GF	WT	9.97506e+10	872.818
597A	WITS 21	Stm attenuated	Cecum	3	33.4611	DH_20_013	GF	WT	4.97869e+09	0
598A	WITS 01	Stm attenuated	Feces	0	14.8038	DH_20_013	GF	WT	9.47867e+10	1836.49
598A	WITS 01	Stm attenuated	Cecum	3	32.7261	DH_20_013	GF	WT	3.8861e+09	0
598A	WITS 02	Stm attenuated	Feces	0	15.4778	DH_20_013	GF	WT	9.47867e+10	1836.49
598A	WITS 02	Stm attenuated	Cecum	3	33.4943	DH_20_013	GF	WT	3.8861e+09	0
598A	WITS 11	Stm attenuated	Feces	0	15.6426	DH_20_013	GF	WT	9.47867e+10	1836.49
598A	WITS 11	Stm attenuated	Cecum	3	33.2295	DH_20_013	GF	WT	3.8861e+09	0
598A	WITS 17	Stm attenuated	Feces	0	15.7341	DH_20_013	GF	WT	9.47867e+10	1836.49
598A	WITS 17	Stm attenuated	Cecum	3	36.6866	DH_20_013	GF	WT	3.8861e+09	0
598A	WITS 19	Stm attenuated	Feces	0	13.8069	DH_20_013	GF	WT	9.47867e+10	1836.49
598A	WITS 19	Stm attenuated	Cecum	3	31.1604	DH_20_013	GF	WT	3.8861e+09	0
598A	WITS 21	Stm attenuated	Feces	0	14.8045	DH_20_013	GF	WT	9.47867e+10	1836.49
598A	WITS 21	Stm attenuated	Cecum	3	33.9986	DH_20_013	GF	WT	3.8861e+09	0
599A	WITS 01	Stm attenuated	Feces	0	13.8306	DH_20_013	GF	WT	5.90164e+10	1058.74
599A	WITS 01	Stm attenuated	Cecum	3	19.0289	DH_20_013	GF	WT	7.57017e+09	0
599A	WITS 02	Stm attenuated	Feces	0	14.0057	DH_20_013	GF	WT	5.90164e+10	1058.74
599A	WITS 02	Stm attenuated	Cecum	3	23.1405	DH_20_013	GF	WT	7.57017e+09	0
599A	WITS 11	Stm attenuated	Feces	0	16.168	DH_20_013	GF	WT	5.90164e+10	1058.74
599A	WITS 11	Stm attenuated	Cecum	3	18.0846	DH_20_013	GF	WT	7.57017e+09	0
599A	WITS 17	Stm attenuated	Feces	0	15.4562	DH_20_013	GF	WT	5.90164e+10	1058.74
599A	WITS 17	Stm attenuated	Cecum	3	16.6636	DH_20_013	GF	WT	7.57017e+09	0
599A	WITS 19	Stm attenuated	Feces	0	14.7283	DH_20_013	GF	WT	5.90164e+10	1058.74
599A	WITS 19	Stm attenuated	Cecum	3	19.9096	DH_20_013	GF	WT	7.57017e+09	0
599A	WITS 21	Stm attenuated	Feces	0	13.3565	DH_20_013	GF	WT	5.90164e+10	1058.74
599A	WITS 21	Stm attenuated	Cecum	3	19.3655	DH_20_013	GF	WT	7.57017e+09	0
600A	WITS 01	Stm attenuated	Feces	0	14.2051	DH_20_013	GF	WT	9.28839e+10	1357.68
600A	WITS 01	Stm attenuated	Cecum	3	32.5178	DH_20_013	GF	WT	2.68697e+09	0
600A	WITS 02	Stm attenuated	Feces	0	15.4833	DH_20_013	GF	WT	9.28839e+10	1357.68
600A	WITS 02	Stm attenuated	Cecum	3	33.6171	DH_20_013	GF	WT	2.68697e+09	0
600A	WITS 11	Stm attenuated	Feces	0	15.0086	DH_20_013	GF	WT	9.28839e+10	1357.68
600A	WITS 11	Stm attenuated	Cecum	3	31.1129	DH_20_013	GF	WT	2.68697e+09	0
600A	WITS 17	Stm attenuated	Feces	0	15.339	DH_20_013	GF	WT	9.28839e+10	1357.68
600A	WITS 17	Stm attenuated	Cecum	3	31.8282	DH_20_013	GF	WT	2.68697e+09	0
600A	WITS 19	Stm attenuated	Feces	0	12.8686	DH_20_013	GF	WT	9.28839e+10	1357.68
600A	WITS 19	Stm attenuated	Cecum	3	29.0924	DH_20_013	GF	WT	2.68697e+09	0
600A	WITS 21	Stm attenuated	Feces	0	14.0714	DH_20_013	GF	WT	9.28839e+10	1357.68
600A	WITS 21	Stm attenuated	Cecum	3	31.4661	DH_20_013	GF	WT	2.68697e+09	0
601A	WITS 01	Stm attenuated	Feces	0	29.9118	DH_20_013	GF	WT	5.7971e+10	301.932
601A	WITS 01	Stm attenuated	Cecum	3	31.1582	DH_20_013	GF	WT	4.08759e+09	0
601A	WITS 02	Stm attenuated	Feces	0	13.9562	DH_20_013	GF	WT	5.7971e+10	301.932
601A	WITS 02	Stm attenuated	Cecum	3	31.6844	DH_20_013	GF	WT	4.08759e+09	0
601A	WITS 11	Stm attenuated	Feces	0	30.2347	DH_20_013	GF	WT	5.7971e+10	301.932
601A	WITS 11	Stm attenuated	Cecum	3	31.5857	DH_20_013	GF	WT	4.08759e+09	0
601A	WITS 17	Stm attenuated	Feces	0	29.7355	DH_20_013	GF	WT	5.7971e+10	301.932
601A	WITS 17	Stm attenuated	Cecum	3	31.7505	DH_20_013	GF	WT	4.08759e+09	0
601A	WITS 19	Stm attenuated	Feces	0	13.9919	DH_20_013	GF	WT	5.7971e+10	301.932
601A	WITS 19	Stm attenuated	Cecum	3	30.4641	DH_20_013	GF	WT	4.08759e+09	0
601A	WITS 21	Stm attenuated	Feces	0	29.5746	DH_20_013	GF	WT	5.7971e+10	301.932
601A	WITS 21	Stm attenuated	Cecum	3	15.1921	DH_20_013	GF	WT	4.08759e+09	0
592A	WITS 01	Stm avirulent	Feces	0	15.3902	DH_20_013	GF	WT	7.42616e+10	791.139
592A	WITS 01	Stm avirulent	Feces	3	17.7831	DH_20_013	GF	WT	2.71186e+10	264.831
592A	WITS 01	Stm avirulent	Cecum	3	14.6045	DH_20_013	GF	WT	8.66504e+09	243.704
592A	WITS 02	Stm avirulent	Feces	0	14.446	DH_20_013	GF	WT	7.42616e+10	791.139
592A	WITS 02	Stm avirulent	Feces	3	33.7113	DH_20_013	GF	WT	2.71186e+10	264.831
592A	WITS 02	Stm avirulent	Cecum	3	17.6419	DH_20_013	GF	WT	8.66504e+09	243.704
592A	WITS 11	Stm avirulent	Feces	0	14.6854	DH_20_013	GF	WT	7.42616e+10	791.139
592A	WITS 11	Stm avirulent	Feces	3	34.3518	DH_20_013	GF	WT	2.71186e+10	264.831
592A	WITS 11	Stm avirulent	Cecum	3	15.3145	DH_20_013	GF	WT	8.66504e+09	243.704
592A	WITS 17	Stm avirulent	Feces	0	14.2945	DH_20_013	GF	WT	7.42616e+10	791.139
592A	WITS 17	Stm avirulent	Feces	3	35.098	DH_20_013	GF	WT	2.71186e+10	264.831
592A	WITS 17	Stm avirulent	Cecum	3	17.3238	DH_20_013	GF	WT	8.66504e+09	243.704
592A	WITS 19	Stm avirulent	Feces	0	15.0352	DH_20_013	GF	WT	7.42616e+10	791.139
592A	WITS 19	Stm avirulent	Feces	3	16.3551	DH_20_013	GF	WT	2.71186e+10	264.831
592A	WITS 19	Stm avirulent	Cecum	3	14.7977	DH_20_013	GF	WT	8.66504e+09	243.704
592A	WITS 21	Stm avirulent	Feces	0	15.1507	DH_20_013	GF	WT	7.42616e+10	791.139
592A	WITS 21	Stm avirulent	Feces	3	36.0448	DH_20_013	GF	WT	2.71186e+10	264.831
592A	WITS 21	Stm avirulent	Cecum	3	15.3809	DH_20_013	GF	WT	8.66504e+09	243.704
593A	WITS 01	Stm avirulent	Feces	0	13.0131	DH_20_013	GF	WT	5.91597e+10	672.269
593A	WITS 01	Stm avirulent	Feces	3	28.8756	DH_20_013	GF	WT	3.37434e+10	43.9367
593A	WITS 01	Stm avirulent	Cecum	3	13.9614	DH_20_013	GF	WT	1.18519e+10	226.337
593A	WITS 02	Stm avirulent	Feces	0	18.4929	DH_20_013	GF	WT	5.91597e+10	672.269
593A	WITS 02	Stm avirulent	Feces	3	33.1518	DH_20_013	GF	WT	3.37434e+10	43.9367
593A	WITS 02	Stm avirulent	Cecum	3	31.8094	DH_20_013	GF	WT	1.18519e+10	226.337
593A	WITS 11	Stm avirulent	Feces	0	14.7376	DH_20_013	GF	WT	5.91597e+10	672.269
593A	WITS 11	Stm avirulent	Feces	3	33.8313	DH_20_013	GF	WT	3.37434e+10	43.9367
593A	WITS 11	Stm avirulent	Cecum	3	17.621	DH_20_013	GF	WT	1.18519e+10	226.337
593A	WITS 17	Stm avirulent	Feces	0	13.1296	DH_20_013	GF	WT	5.91597e+10	672.269
593A	WITS 17	Stm avirulent	Feces	3	32.0747	DH_20_013	GF	WT	3.37434e+10	43.9367
593A	WITS 17	Stm avirulent	Cecum	3	14.9042	DH_20_013	GF	WT	1.18519e+10	226.337
593A	WITS 19	Stm avirulent	Feces	0	29.3993	DH_20_013	GF	WT	5.91597e+10	672.269
593A	WITS 19	Stm avirulent	Feces	3	33.4002	DH_20_013	GF	WT	3.37434e+10	43.9367
593A	WITS 19	Stm avirulent	Cecum	3	32.6789	DH_20_013	GF	WT	1.18519e+10	226.337
593A	WITS 21	Stm avirulent	Feces	0	32.0165	DH_20_013	GF	WT	5.91597e+10	672.269
593A	WITS 21	Stm avirulent	Feces	3	15.5516	DH_20_013	GF	WT	3.37434e+10	43.9367
593A	WITS 21	Stm avirulent	Cecum	3	13.0135	DH_20_013	GF	WT	1.18519e+10	226.337
594A	WITS 01	Stm avirulent	Feces	0	18.1821	DH_20_013	GF	WT	4.03361e+10	892.857
594A	WITS 01	Stm avirulent	Feces	3	32.0963	DH_20_013	GF	WT	9.16905e+09	143.266
594A	WITS 01	Stm avirulent	Cecum	3	32.8888	DH_20_013	GF	WT	9.23158e+09	309.468
594A	WITS 02	Stm avirulent	Feces	0	16.2877	DH_20_013	GF	WT	4.03361e+10	892.857
594A	WITS 02	Stm avirulent	Feces	3	33.4318	DH_20_013	GF	WT	9.16905e+09	143.266
594A	WITS 02	Stm avirulent	Cecum	3	16.2972	DH_20_013	GF	WT	9.23158e+09	309.468
594A	WITS 11	Stm avirulent	Feces	0	13.4445	DH_20_013	GF	WT	4.03361e+10	892.857
594A	WITS 11	Stm avirulent	Feces	3	16.0542	DH_20_013	GF	WT	9.16905e+09	143.266
594A	WITS 11	Stm avirulent	Cecum	3	12.9887	DH_20_013	GF	WT	9.23158e+09	309.468
594A	WITS 17	Stm avirulent	Feces	0	13.6223	DH_20_013	GF	WT	4.03361e+10	892.857
594A	WITS 17	Stm avirulent	Feces	3	34.5737	DH_20_013	GF	WT	9.16905e+09	143.266
594A	WITS 17	Stm avirulent	Cecum	3	33.999	DH_20_013	GF	WT	9.23158e+09	309.468
594A	WITS 19	Stm avirulent	Feces	0	13.9025	DH_20_013	GF	WT	4.03361e+10	892.857
594A	WITS 19	Stm avirulent	Feces	3	33.8534	DH_20_013	GF	WT	9.16905e+09	143.266
594A	WITS 19	Stm avirulent	Cecum	3	14.94	DH_20_013	GF	WT	9.23158e+09	309.468
594A	WITS 21	Stm avirulent	Feces	0	13.6939	DH_20_013	GF	WT	4.03361e+10	892.857
594A	WITS 21	Stm avirulent	Feces	3	17.2182	DH_20_013	GF	WT	9.16905e+09	143.266
594A	WITS 21	Stm avirulent	Cecum	3	13.2872	DH_20_013	GF	WT	9.23158e+09	309.468
595A	WITS 01	Stm avirulent	Feces	0	18.9024	DH_20_013	GF	WT	3.72635e+10	1382.82
595A	WITS 01	Stm avirulent	Feces	3	29.5879	DH_20_013	GF	WT	3.31797e+10	460.829
595A	WITS 01	Stm avirulent	Cecum	3	15.249	DH_20_013	GF	WT	1.19255e+10	287.267
595A	WITS 02	Stm avirulent	Feces	0	17.3024	DH_20_013	GF	WT	3.72635e+10	1382.82
595A	WITS 02	Stm avirulent	Feces	3	31.8622	DH_20_013	GF	WT	3.31797e+10	460.829
595A	WITS 02	Stm avirulent	Cecum	3	15.2	DH_20_013	GF	WT	1.19255e+10	287.267
595A	WITS 11	Stm avirulent	Feces	0	15.1478	DH_20_013	GF	WT	3.72635e+10	1382.82
595A	WITS 11	Stm avirulent	Feces	3	16.551	DH_20_013	GF	WT	3.31797e+10	460.829
595A	WITS 11	Stm avirulent	Cecum	3	13.6507	DH_20_013	GF	WT	1.19255e+10	287.267
595A	WITS 17	Stm avirulent	Feces	0	15.59	DH_20_013	GF	WT	3.72635e+10	1382.82
595A	WITS 17	Stm avirulent	Feces	3	20.0737	DH_20_013	GF	WT	3.31797e+10	460.829
595A	WITS 17	Stm avirulent	Cecum	3	34.7327	DH_20_013	GF	WT	1.19255e+10	287.267
595A	WITS 19	Stm avirulent	Feces	0	15.5742	DH_20_013	GF	WT	3.72635e+10	1382.82
595A	WITS 19	Stm avirulent	Feces	3	31.8217	DH_20_013	GF	WT	3.31797e+10	460.829
595A	WITS 19	Stm avirulent	Cecum	3	14.3143	DH_20_013	GF	WT	1.19255e+10	287.267
595A	WITS 21	Stm avirulent	Feces	0	14.6644	DH_20_013	GF	WT	3.72635e+10	1382.82
595A	WITS 21	Stm avirulent	Feces	3	17.1236	DH_20_013	GF	WT	3.31797e+10	460.829
595A	WITS 21	Stm avirulent	Cecum	3	16.6898	DH_20_013	GF	WT	1.19255e+10	287.267
596A	WITS 01	Stm avirulent	Feces	0	16.0821	DH_20_013	GF	WT	7.78378e+10	1959.46
596A	WITS 01	Stm avirulent	Feces	3	15.4818	DH_20_013	GF	WT	1.84332e+10	1497.7
596A	WITS 01	Stm avirulent	Cecum	3	14.0757	DH_20_013	GF	WT	8.03885e+09	473.957
596A	WITS 02	Stm avirulent	Feces	0	13.8928	DH_20_013	GF	WT	7.78378e+10	1959.46
596A	WITS 02	Stm avirulent	Feces	3	19.2796	DH_20_013	GF	WT	1.84332e+10	1497.7
596A	WITS 02	Stm avirulent	Cecum	3	15.0936	DH_20_013	GF	WT	8.03885e+09	473.957
596A	WITS 11	Stm avirulent	Feces	0	14.4431	DH_20_013	GF	WT	7.78378e+10	1959.46
596A	WITS 11	Stm avirulent	Feces	3	17.5277	DH_20_013	GF	WT	1.84332e+10	1497.7
596A	WITS 11	Stm avirulent	Cecum	3	13.6452	DH_20_013	GF	WT	8.03885e+09	473.957
596A	WITS 17	Stm avirulent	Feces	0	16.6014	DH_20_013	GF	WT	7.78378e+10	1959.46
596A	WITS 17	Stm avirulent	Feces	3	37.9098	DH_20_013	GF	WT	1.84332e+10	1497.7
596A	WITS 17	Stm avirulent	Cecum	3	17.1974	DH_20_013	GF	WT	8.03885e+09	473.957
596A	WITS 19	Stm avirulent	Feces	0	13.7628	DH_20_013	GF	WT	7.78378e+10	1959.46
596A	WITS 19	Stm avirulent	Feces	3	20.0326	DH_20_013	GF	WT	1.84332e+10	1497.7
596A	WITS 19	Stm avirulent	Cecum	3	14.7126	DH_20_013	GF	WT	8.03885e+09	473.957
596A	WITS 21	Stm avirulent	Feces	0	13.4316	DH_20_013	GF	WT	7.78378e+10	1959.46
596A	WITS 21	Stm avirulent	Feces	3	18.4912	DH_20_013	GF	WT	1.84332e+10	1497.7
596A	WITS 21	Stm avirulent	Cecum	3	13.2828	DH_20_013	GF	WT	8.03885e+09	473.957
Ino	WITS 01		Inoculum		12.3535	DH_19_041	GF	WT	400	310000000
Ino	WITS 02		Inoculum		13.1745	DH_19_041	GF	WT	400	310000000
Ino	WITS 11		Inoculum		13.014	DH_19_041	GF	WT	400	310000000
Ino	WITS 17		Inoculum		11.1335	DH_19_041	GF	WT	400	310000000
Ino	WITS 19		Inoculum		13.0885	DH_19_041	GF	WT	400	310000000
Ino	WITS 21		Inoculum		12.271	DH_19_041	GF	WT	400	310000000
Ino	WITS 01		Inoculum		13.144	DH_20_002	GF	WT	190	7040000000
Ino	WITS 02		Inoculum		14.003	DH_20_002	GF	WT	190	7040000000
Ino	WITS 11		Inoculum		13.9195	DH_20_002	GF	WT	190	7040000000
Ino	WITS 17		Inoculum		12.9375	DH_20_002	GF	WT	190	7040000000
Ino	WITS 19		Inoculum		12.8975	DH_20_002	GF	WT	190	7040000000
Ino	WITS 21		Inoculum		13.669	DH_20_002	GF	WT	190	7040000000
Ino	WITS 01		Inoculum		15.227	DH_20_021	GF	WT	900	3200000000
Ino	WITS 02		Inoculum		17.3055	DH_20_021	GF	WT	900	3200000000
Ino	WITS 11		Inoculum		16.828	DH_20_021	GF	WT	900	3200000000
Ino	WITS 17		Inoculum		17.693	DH_20_021	GF	WT	900	3200000000
Ino	WITS 19		Inoculum		17.891	DH_20_021	GF	WT	900	3200000000
Ino	WITS 21		Inoculum		17.537	DH_20_021	GF	WT	900	3200000000
Ino	WITS 01		Inoculum		14.0762	DH_20_013	GF	WT	600	104000000000
Ino	WITS 02		Inoculum		15.8369	DH_20_013	GF	WT	600	104000000000
Ino	WITS 11		Inoculum		15.7943	DH_20_013	GF	WT	600	104000000000
Ino	WITS 17		Inoculum		15.7829	DH_20_013	GF	WT	600	104000000000
Ino	WITS 19		Inoculum		15.3966	DH_20_013	GF	WT	600	104000000000
Ino	WITS 21		Inoculum		15.2806	DH_20_013	GF	WT	600	104000000000

## Sheet: Fig4-Supp1
Sample	Target	Challenge	Source	Day	Ctm	Experiment	Microbiota	Strain	CFU_Tet_g	CFU_Ery_g	rel.CFU.g	Ino.CFU.Exp	Ino.WITS
274A	WITS 01	Control	Feces	0	14.607	DH_19_041	GF	WT	245100000000	18627.5	1160.29	400	66.6667
274A	WITS 02	Control	Feces	0	15.5235	DH_19_041	GF	WT	245100000000	18627.5	614.711	400	66.6667
274A	WITS 11	Control	Feces	0	12.6185	DH_19_041	GF	WT	245100000000	18627.5	4604.29	400	66.6667
274A	WITS 17	Control	Feces	0	14.1325	DH_19_041	GF	WT	245100000000	18627.5	1612.14	400	66.6667
274A	WITS 19	Control	Feces	0	12.88	DH_19_041	GF	WT	245100000000	18627.5	3840.99	400	66.6667
274A	WITS 21	Control	Feces	0	12.057	DH_19_041	GF	WT	245100000000	18627.5	6795.03	400	66.6667
275A	WITS 01	Control	Feces	0	14.3255	DH_19_041	GF	WT	236260000000	153846	9829.18	400	66.6667
275A	WITS 02	Control	Feces	0	21.9745	DH_19_041	GF	WT	236260000000	153846	48.971	400	66.6667
275A	WITS 11	Control	Feces	0	12.4855	DH_19_041	GF	WT	236260000000	153846	35189.4	400	66.6667
275A	WITS 17	Control	Feces	0	13.186	DH_19_041	GF	WT	236260000000	153846	21654.1	400	66.6667
275A	WITS 19	Control	Feces	0	12.791	DH_19_041	GF	WT	236260000000	153846	28474	400	66.6667
275A	WITS 21	Control	Feces	0	11.7485	DH_19_041	GF	WT	236260000000	153846	58650.5	400	66.6667
276A	WITS 01	Control	Feces	0	13.107	DH_19_041	GF	WT	285710000000	887755	167128	400	66.6667
276A	WITS 02	Control	Feces	0	18.0675	DH_19_041	GF	WT	285710000000	887755	5367.71	400	66.6667
276A	WITS 11	Control	Feces	0	14.138	DH_19_041	GF	WT	285710000000	887755	81787.4	400	66.6667
276A	WITS 17	Control	Feces	0	13.017	DH_19_041	GF	WT	285710000000	887755	177886	400	66.6667
276A	WITS 19	Control	Feces	0	14.324	DH_19_041	GF	WT	285710000000	887755	71894.3	400	66.6667
276A	WITS 21	Control	Feces	0	11.908	DH_19_041	GF	WT	285710000000	887755	383692	400	66.6667
274A	WITS 01	Control	Cecum	3	17.642	DH_19_041	GF	WT	12245000000	4217.69	279.929	400	66.6667
274A	WITS 02	Control	Cecum	3	19.33	DH_19_041	GF	WT	12245000000	4217.69	86.878	400	66.6667
274A	WITS 11	Control	Cecum	3	15.511	DH_19_041	GF	WT	12245000000	4217.69	1226.15	400	66.6667
274A	WITS 17	Control	Cecum	3	16.523	DH_19_041	GF	WT	12245000000	4217.69	607.997	400	66.6667
274A	WITS 19	Control	Cecum	3	16.3555	DH_19_041	GF	WT	12245000000	4217.69	682.847	400	66.6667
274A	WITS 21	Control	Cecum	3	15.3895	DH_19_041	GF	WT	12245000000	4217.69	1333.89	400	66.6667
275A	WITS 01	Control	Cecum	3	16.3025	DH_19_041	GF	WT	8241758242	12087.9	860.951	400	66.6667
275A	WITS 02	Control	Cecum	3	20.803	DH_19_041	GF	WT	8241758242	12087.9	38.0358	400	66.6667
275A	WITS 11	Control	Cecum	3	14.727	DH_19_041	GF	WT	8241758242	12087.9	2565.97	400	66.6667
275A	WITS 17	Control	Cecum	3	15.866	DH_19_041	GF	WT	8241758242	12087.9	1165.14	400	66.6667
275A	WITS 19	Control	Cecum	3	14.6735	DH_19_041	GF	WT	8241758242	12087.9	2662.91	400	66.6667
275A	WITS 21	Control	Cecum	3	13.825	DH_19_041	GF	WT	8241758242	12087.9	4794.91	400	66.6667
276A	WITS 01	Control	Cecum	3	14.0305	DH_19_041	GF	WT	17910000000	253731	50734.8	400	66.6667
276A	WITS 02	Control	Cecum	3	19.429	DH_19_041	GF	WT	17910000000	253731	1202.8	400	66.6667
276A	WITS 11	Control	Cecum	3	15.4935	DH_19_041	GF	WT	17910000000	253731	18403.4	400	66.6667
276A	WITS 17	Control	Cecum	3	15.0875	DH_19_041	GF	WT	17910000000	253731	24384.7	400	66.6667
276A	WITS 19	Control	Cecum	3	14.89	DH_19_041	GF	WT	17910000000	253731	27962.1	400	66.6667
276A	WITS 21	Control	Cecum	3	12.6615	DH_19_041	GF	WT	17910000000	253731	131044	400	66.6667
274A	WITS 01	Control	Feces	3	17.542	DH_19_041	GF	WT	176470000000	17647.1	1921.22	400	66.6667
274A	WITS 02	Control	Feces	3	19.9215	DH_19_041	GF	WT	176470000000	17647.1	369.212	400	66.6667
274A	WITS 11	Control	Feces	3	15.8995	DH_19_041	GF	WT	176470000000	17647.1	5998.16	400	66.6667
274A	WITS 17	Control	Feces	3	18.2265	DH_19_041	GF	WT	176470000000	17647.1	1195.42	400	66.6667
274A	WITS 19	Control	Feces	3	16.838	DH_19_041	GF	WT	176470000000	17647.1	3129.69	400	66.6667
274A	WITS 21	Control	Feces	3	16.1525	DH_19_041	GF	WT	176470000000	17647.1	5033.36	400	66.6667
275A	WITS 01	Control	Feces	3	19.36	DH_19_041	GF	WT	190000000000	100000	1057.38	400	66.6667
275A	WITS 02	Control	Feces	3	21.7295	DH_19_041	GF	WT	190000000000	100000	204.616	400	66.6667
275A	WITS 11	Control	Feces	3	14.971	DH_19_041	GF	WT	190000000000	100000	22154	400	66.6667
275A	WITS 17	Control	Feces	3	16.8045	DH_19_041	GF	WT	190000000000	100000	6216.02	400	66.6667
275A	WITS 19	Control	Feces	3	14.8325	DH_19_041	GF	WT	190000000000	100000	24386.2	400	66.6667
275A	WITS 21	Control	Feces	3	13.9175	DH_19_041	GF	WT	190000000000	100000	45981.8	400	66.6667
276A	WITS 01	Control	Feces	3	13.9565	DH_19_041	GF	WT	372550000000	568627	101581	400	66.6667
276A	WITS 02	Control	Feces	3	19.643	DH_19_041	GF	WT	372550000000	568627	1972.46	400	66.6667
276A	WITS 11	Control	Feces	3	14.822	DH_19_041	GF	WT	372550000000	568627	55753.6	400	66.6667
276A	WITS 17	Control	Feces	3	15.17	DH_19_041	GF	WT	372550000000	568627	43804.1	400	66.6667
276A	WITS 19	Control	Feces	3	14.713	DH_19_041	GF	WT	372550000000	568627	60129.2	400	66.6667
276A	WITS 21	Control	Feces	3	12.3685	DH_19_041	GF	WT	372550000000	568627	305387	400	66.6667
414A	WITS 01	Control	Feces	0	13.8405	DH_20_002	GF	WT	738460000000	11538.5	2018.1	190	31.6667
414A	WITS 02	Control	Feces	0	16.0075	DH_20_002	GF	WT	738460000000	11538.5	449.377	190	31.6667
414A	WITS 11	Control	Feces	0	13.1695	DH_20_002	GF	WT	738460000000	11538.5	3213.17	190	31.6667
414A	WITS 17	Control	Feces	0	18.1135	DH_20_002	GF	WT	738460000000	11538.5	104.386	190	31.6667
414A	WITS 19	Control	Feces	0	13.506	DH_20_002	GF	WT	738460000000	11538.5	2544.7	190	31.6667
414A	WITS 21	Control	Feces	0	13.1715	DH_20_002	GF	WT	738460000000	11538.5	3208.72	190	31.6667
415A	WITS 01	Control	Feces	0	13.9135	DH_20_002	GF	WT	117070000000	31707.3	6397.97	190	31.6667
415A	WITS 02	Control	Feces	0	15.992	DH_20_002	GF	WT	117070000000	31707.3	1514.79	190	31.6667
415A	WITS 11	Control	Feces	0	13.778	DH_20_002	GF	WT	117070000000	31707.3	7028	190	31.6667
415A	WITS 17	Control	Feces	0	17.275	DH_20_002	GF	WT	117070000000	31707.3	622.487	190	31.6667
415A	WITS 19	Control	Feces	0	13.26	DH_20_002	GF	WT	117070000000	31707.3	10063.9	190	31.6667
415A	WITS 21	Control	Feces	0	13.987	DH_20_002	GF	WT	117070000000	31707.3	6080.18	190	31.6667
414A	WITS 01	Control	Feces	3	14.384	DH_20_002	GF	WT	647190000000	6741.57	814.852	190	31.6667
414A	WITS 02	Control	Feces	3	16.8135	DH_20_002	GF	WT	647190000000	6741.57	151.261	190	31.6667
414A	WITS 11	Control	Feces	3	13.947	DH_20_002	GF	WT	647190000000	6741.57	1103.14	190	31.6667
414A	WITS 17	Control	Feces	3	18.033	DH_20_002	GF	WT	647190000000	6741.57	64.9562	190	31.6667
414A	WITS 19	Control	Feces	3	14.2665	DH_20_002	GF	WT	647190000000	6741.57	883.995	190	31.6667
414A	WITS 21	Control	Feces	3	12.192	DH_20_002	GF	WT	647190000000	6741.57	3723.37	190	31.6667
415A	WITS 01	Control	Feces	3	13.7525	DH_20_002	GF	WT	200000000000	15625	3123.34	190	31.6667
415A	WITS 02	Control	Feces	3	33.666	DH_20_002	GF	WT	200000000000	15625	10	190	31.6667
415A	WITS 11	Control	Feces	3	13.9665	DH_20_002	GF	WT	200000000000	15625	2692.77	190	31.6667
415A	WITS 17	Control	Feces	3	19.413	DH_20_002	GF	WT	200000000000	15625	61.7503	190	31.6667
415A	WITS 19	Control	Feces	3	12.5765	DH_20_002	GF	WT	200000000000	15625	7057.17	190	31.6667
415A	WITS 21	Control	Feces	3	13.968	DH_20_002	GF	WT	200000000000	15625	2689.97	190	31.6667
414A	WITS 01	Control	Cecum	3	15.3985	DH_20_002	GF	WT	161740000000	2250.35	172.7	190	31.6667
414A	WITS 02	Control	Cecum	3	18.049	DH_20_002	GF	WT	161740000000	2250.35	27.505	190	31.6667
414A	WITS 11	Control	Cecum	3	13.765	DH_20_002	GF	WT	161740000000	2250.35	535.826	190	31.6667
414A	WITS 17	Control	Cecum	3	17.806	DH_20_002	GF	WT	161740000000	2250.35	32.5508	190	31.6667
414A	WITS 19	Control	Cecum	3	14.0985	DH_20_002	GF	WT	161740000000	2250.35	425.237	190	31.6667
414A	WITS 21	Control	Cecum	3	12.7855	DH_20_002	GF	WT	161740000000	2250.35	1056.53	190	31.6667
415A	WITS 01	Control	Cecum	3	14.388	DH_20_002	GF	WT	420260000000	12007.5	1799.09	190	31.6667
415A	WITS 02	Control	Cecum	3	17.479	DH_20_002	GF	WT	420260000000	12007.5	211.14	190	31.6667
415A	WITS 11	Control	Cecum	3	13.92	DH_20_002	GF	WT	420260000000	12007.5	2488.49	190	31.6667
415A	WITS 17	Control	Cecum	3	19.1655	DH_20_002	GF	WT	420260000000	12007.5	65.5968	190	31.6667
415A	WITS 19	Control	Cecum	3	12.93	DH_20_002	GF	WT	420260000000	12007.5	4942.6	190	31.6667
415A	WITS 21	Control	Cecum	3	13.913	DH_20_002	GF	WT	420260000000	12007.5	2500.59	190	31.6667
796A	WITS 01	Control	Cecum	3	14.82	DH_20_021	GF	WT	17822000000	250.627	33.6712	900	150
796A	WITS 02	Control	Cecum	3	17.044	DH_20_021	GF	WT	17822000000	250.627	10	900	150
796A	WITS 11	Control	Cecum	3	12.893	DH_20_021	GF	WT	17822000000	250.627	128.039	900	150
796A	WITS 17	Control	Cecum	3	14.412	DH_20_021	GF	WT	17822000000	250.627	44.6764	900	150
796A	WITS 19	Control	Cecum	3	17.0775	DH_20_021	GF	WT	17822000000	250.627	10	900	150
796A	WITS 21	Control	Cecum	3	14.987	DH_20_021	GF	WT	17822000000	250.627	29.9907	900	150
797A	WITS 01	Control	Cecum	3	25.9975	DH_20_021	GF	WT	13445000000	279.66	10	900	150
797A	WITS 02	Control	Cecum	3	16.8525	DH_20_021	GF	WT	13445000000	279.66	105.533	900	150
797A	WITS 11	Control	Cecum	3	18.7985	DH_20_021	GF	WT	13445000000	279.66	27.3894	900	150
797A	WITS 17	Control	Cecum	3	17.0005	DH_20_021	GF	WT	13445000000	279.66	95.2433	900	150
797A	WITS 19	Control	Cecum	3	19.6655	DH_20_021	GF	WT	13445000000	279.66	15.0172	900	150
797A	WITS 21	Control	Cecum	3	18.3925	DH_20_021	GF	WT	13445000000	279.66	36.2911	900	150
796A	WITS 01	Control	Feces	0	14.4545	DH_20_021	GF	WT	64000000000	1466.67	243.181	900	150
796A	WITS 02	Control	Feces	0	16.9155	DH_20_021	GF	WT	64000000000	1466.67	44.1666	900	150
796A	WITS 11	Control	Feces	0	13.1645	DH_20_021	GF	WT	64000000000	1466.67	594.645	900	150
796A	WITS 17	Control	Feces	0	14.699	DH_20_021	GF	WT	64000000000	1466.67	205.271	900	150
796A	WITS 19	Control	Feces	0	16.9845	DH_20_021	GF	WT	64000000000	1466.67	42.104	900	150
796A	WITS 21	Control	Feces	0	13.9825	DH_20_021	GF	WT	64000000000	1466.67	337.299	900	150
797A	WITS 01	Control	Feces	0	18.939	DH_20_021	GF	WT	46667000000	833.333	10	900	150
797A	WITS 02	Control	Feces	0	36.5235	DH_20_021	GF	WT	46667000000	833.333	10	900	150
797A	WITS 11	Control	Feces	0	13.011	DH_20_021	GF	WT	46667000000	833.333	304.676	900	150
797A	WITS 17	Control	Feces	0	13.165	DH_20_021	GF	WT	46667000000	833.333	273.829	900	150
797A	WITS 19	Control	Feces	0	14.047	DH_20_021	GF	WT	46667000000	833.333	148.584	900	150
797A	WITS 21	Control	Feces	0	14.6005	DH_20_021	GF	WT	46667000000	833.333	101.24	900	150
796A	WITS 01	Control	Feces	3	16.4635	DH_20_021	GF	WT	23346000000	1896.89	613.045	900	150
796A	WITS 02	Control	Feces	3	20.2145	DH_20_021	GF	WT	23346000000	1896.89	45.5332	900	150
796A	WITS 11	Control	Feces	3	16.276	DH_20_021	GF	WT	23346000000	1896.89	698.128	900	150
796A	WITS 17	Control	Feces	3	17.7905	DH_20_021	GF	WT	23346000000	1896.89	244.357	900	150
796A	WITS 19	Control	Feces	3	19.2785	DH_20_021	GF	WT	23346000000	1896.89	87.1149	900	150
796A	WITS 21	Control	Feces	3	18.018	DH_20_021	GF	WT	23346000000	1896.89	208.709	900	150
797A	WITS 01	Control	Feces	3	34.4245	DH_20_021	GF	WT	54857000000	2285.71	10	900	150
797A	WITS 02	Control	Feces	3	37.2025	DH_20_021	GF	WT	54857000000	2285.71	10	900	150
797A	WITS 11	Control	Feces	3	15.9275	DH_20_021	GF	WT	54857000000	2285.71	1050.85	900	150
797A	WITS 17	Control	Feces	3	23.2855	DH_20_021	GF	WT	54857000000	2285.71	10	900	150
797A	WITS 19	Control	Feces	3	17.2845	DH_20_021	GF	WT	54857000000	2285.71	410.244	900	150
797A	WITS 21	Control	Feces	3	16.2885	DH_20_021	GF	WT	54857000000	2285.71	818.216	900	150
582A	WITS 01	Control	Feces	0	13.3241	DH_20_013	GF	WT	67086000000	838.574	218.935	600	100
582A	WITS 01	Control	Feces	3	15.1898	DH_20_013	GF	WT	37915000000	1362.56	477.183	600	100
582A	WITS 01	Control	Cecum	3	14.9616	DH_20_013	GF	WT	15243000000	473.115	70.3555	600	100
582A	WITS 02	Control	Feces	0	15.6622	DH_20_013	GF	WT	67086000000	838.574	43.2984	600	100
582A	WITS 02	Control	Feces	3	33.5394	DH_20_013	GF	WT	37915000000	1362.56	10	600	100
582A	WITS 02	Control	Cecum	3	14.2197	DH_20_013	GF	WT	15243000000	473.115	117.66	600	100
582A	WITS 11	Control	Feces	0	12.4307	DH_20_013	GF	WT	67086000000	838.574	406.681	600	100
582A	WITS 11	Control	Feces	3	15.7868	DH_20_013	GF	WT	37915000000	1362.56	315.493	600	100
582A	WITS 11	Control	Cecum	3	14.1851	DH_20_013	GF	WT	15243000000	473.115	120.514	600	100
582A	WITS 17	Control	Feces	0	15.7286	DH_20_013	GF	WT	67086000000	838.574	41.3502	600	100
582A	WITS 17	Control	Feces	3	31.7267	DH_20_013	GF	WT	37915000000	1362.56	10	600	100
582A	WITS 17	Control	Cecum	3	21.1151	DH_20_013	GF	WT	15243000000	473.115	10	600	100
582A	WITS 19	Control	Feces	0	14.095	DH_20_013	GF	WT	67086000000	838.574	128.31	600	100
582A	WITS 19	Control	Feces	3	14.9337	DH_20_013	GF	WT	37915000000	1362.56	569.883	600	100
582A	WITS 19	Control	Cecum	3	13.9996	DH_20_013	GF	WT	15243000000	473.115	137.057	600	100
582A	WITS 21	Control	Feces	0	33.4867	DH_20_013	GF	WT	67086000000	838.574	10	600	100
582A	WITS 21	Control	Feces	3	38.7847	DH_20_013	GF	WT	37915000000	1362.56	10	600	100
582A	WITS 21	Control	Cecum	3	16.3681	DH_20_013	GF	WT	15243000000	473.115	26.5398	600	100
583A	WITS 01	Control	Feces	0	33.1709	DH_20_013	GF	WT	99083000000	1433.49	10	600	100
583A	WITS 01	Control	Feces	3	28.7755	DH_20_013	GF	WT	66806000000	469.729	10	600	100
583A	WITS 01	Control	Cecum	3	23.359	DH_20_013	GF	WT	13296000000	260.714	10	600	100
583A	WITS 02	Control	Feces	0	16.343	DH_20_013	GF	WT	99083000000	1433.49	55.4748	600	100
583A	WITS 02	Control	Feces	3	32.1435	DH_20_013	GF	WT	66806000000	469.729	10	600	100
583A	WITS 02	Control	Cecum	3	17.1928	DH_20_013	GF	WT	13296000000	260.714	10	600	100
583A	WITS 11	Control	Feces	0	12.4919	DH_20_013	GF	WT	99083000000	1433.49	800.567	600	100
583A	WITS 11	Control	Feces	3	16.174	DH_20_013	GF	WT	66806000000	469.729	136.45	600	100
583A	WITS 11	Control	Cecum	3	14.7049	DH_20_013	GF	WT	13296000000	260.714	49.484	600	100
583A	WITS 17	Control	Feces	0	14.5099	DH_20_013	GF	WT	99083000000	1433.49	197.65	600	100
583A	WITS 17	Control	Feces	3	16.8171	DH_20_013	GF	WT	66806000000	469.729	87.3736	600	100
583A	WITS 17	Control	Cecum	3	15.3893	DH_20_013	GF	WT	13296000000	260.714	30.7914	600	100
583A	WITS 19	Control	Feces	0	13.7573	DH_20_013	GF	WT	99083000000	1433.49	333.012	600	100
583A	WITS 19	Control	Feces	3	15.7744	DH_20_013	GF	WT	66806000000	469.729	180.001	600	100
583A	WITS 19	Control	Cecum	3	12.9487	DH_20_013	GF	WT	13296000000	260.714	167.165	600	100
583A	WITS 21	Control	Feces	0	16.5889	DH_20_013	GF	WT	99083000000	1433.49	46.782	600	100
583A	WITS 21	Control	Feces	3	17.2245	DH_20_013	GF	WT	66806000000	469.729	65.8818	600	100
583A	WITS 21	Control	Cecum	3	18.2197	DH_20_013	GF	WT	13296000000	260.714	10	600	100
584A	WITS 01	Control	Feces	0	13.3061	DH_20_013	GF	WT	170410000000	1528.6	350.399	600	100
584A	WITS 01	Control	Feces	3	15.0014	DH_20_013	GF	WT	56140000000	341.131	125.705	600	100
584A	WITS 01	Control	Cecum	3	15.2442	DH_20_013	GF	WT	13230000000	280.792	57.6391	600	100
584A	WITS 02	Control	Feces	0	15.8394	DH_20_013	GF	WT	170410000000	1528.6	60.5277	600	100
584A	WITS 02	Control	Feces	3	31.4607	DH_20_013	GF	WT	56140000000	341.131	10	600	100
584A	WITS 02	Control	Cecum	3	20.9978	DH_20_013	GF	WT	13230000000	280.792	10	600	100
584A	WITS 11	Control	Feces	0	13.377	DH_20_013	GF	WT	170410000000	1528.6	333.603	600	100
584A	WITS 11	Control	Feces	3	29.4914	DH_20_013	GF	WT	56140000000	341.131	10	600	100
584A	WITS 11	Control	Cecum	3	15.3825	DH_20_013	GF	WT	13230000000	280.792	52.3722	600	100
584A	WITS 17	Control	Feces	0	14.03	DH_20_013	GF	WT	170410000000	1528.6	212.158	600	100
584A	WITS 17	Control	Feces	3	32.777	DH_20_013	GF	WT	56140000000	341.131	10	600	100
584A	WITS 17	Control	Cecum	3	17.1428	DH_20_013	GF	WT	13230000000	280.792	15.4592	600	100
584A	WITS 19	Control	Feces	0	15.7884	DH_20_013	GF	WT	170410000000	1528.6	62.7051	600	100
584A	WITS 19	Control	Feces	3	15.9484	DH_20_013	GF	WT	56140000000	341.131	65.2057	600	100
584A	WITS 19	Control	Cecum	3	18.3601	DH_20_013	GF	WT	13230000000	280.792	10	600	100
584A	WITS 21	Control	Feces	0	12.7668	DH_20_013	GF	WT	170410000000	1528.6	509.207	600	100
584A	WITS 21	Control	Feces	3	14.7444	DH_20_013	GF	WT	56140000000	341.131	150.22	600	100
584A	WITS 21	Control	Cecum	3	13.8876	DH_20_013	GF	WT	13230000000	280.792	147.605	600	100
585A	WITS 01	Control	Feces	0	12.3655	DH_20_013	GF	WT	87273000000	757.576	331.896	600	100
585A	WITS 01	Control	Feces	3	15.7723	DH_20_013	GF	WT	70541000000	100.2	55.6887	600	100
585A	WITS 01	Control	Cecum	3	13.7256	DH_20_013	GF	WT	12004000000	264.38	102.684	600	100
585A	WITS 02	Control	Feces	0	31.3988	DH_20_013	GF	WT	87273000000	757.576	10	600	100
585A	WITS 02	Control	Feces	3	31.3911	DH_20_013	GF	WT	70541000000	100.2	10	600	100
585A	WITS 02	Control	Cecum	3	15.9073	DH_20_013	GF	WT	12004000000	264.38	22.6326	600	100
585A	WITS 11	Control	Feces	0	30.2564	DH_20_013	GF	WT	87273000000	757.576	10	600	100
585A	WITS 11	Control	Feces	3	35.8529	DH_20_013	GF	WT	70541000000	100.2	10	600	100
585A	WITS 11	Control	Cecum	3	18.6502	DH_20_013	GF	WT	12004000000	264.38	10	600	100
585A	WITS 17	Control	Feces	0	32.3082	DH_20_013	GF	WT	87273000000	757.576	10	600	100
585A	WITS 17	Control	Feces	3	37.905	DH_20_013	GF	WT	70541000000	100.2	10	600	100
585A	WITS 17	Control	Cecum	3	15.5469	DH_20_013	GF	WT	12004000000	264.38	29.0562	600	100
585A	WITS 19	Control	Feces	0	15.5068	DH_20_013	GF	WT	87273000000	757.576	37.6172	600	100
585A	WITS 19	Control	Feces	3	16.0955	DH_20_013	GF	WT	70541000000	100.2	44.5117	600	100
585A	WITS 19	Control	Cecum	3	14.7654	DH_20_013	GF	WT	12004000000	264.38	49.9452	600	100
585A	WITS 21	Control	Feces	0	12.1399	DH_20_013	GF	WT	87273000000	757.576	388.062	600	100
585A	WITS 21	Control	Feces	3	37.7103	DH_20_013	GF	WT	70541000000	100.2	10	600	100
585A	WITS 21	Control	Cecum	3	14.5828	DH_20_013	GF	WT	12004000000	264.38	56.681	600	100
586A	WITS 01	Control	Feces	0	31.2975	DH_20_013	GF	WT	72316000000	753.296	10	600	100
586A	WITS 01	Control	Feces	3	16.4446	DH_20_013	GF	WT	77966000000	847.458	230.203	600	100
586A	WITS 01	Control	Cecum	3	18.7557	DH_20_013	GF	WT	13636000000	275.213	10	600	100
586A	WITS 02	Control	Feces	0	16.1808	DH_20_013	GF	WT	72316000000	753.296	75.3193	600	100
586A	WITS 02	Control	Feces	3	33.6137	DH_20_013	GF	WT	77966000000	847.458	10	600	100
586A	WITS 02	Control	Cecum	3	18.4949	DH_20_013	GF	WT	13636000000	275.213	10	600	100
586A	WITS 11	Control	Feces	0	14.2414	DH_20_013	GF	WT	72316000000	753.296	288.883	600	100
586A	WITS 11	Control	Feces	3	15.7195	DH_20_013	GF	WT	77966000000	847.458	380.541	600	100
586A	WITS 11	Control	Cecum	3	12.8202	DH_20_013	GF	WT	13636000000	275.213	206.056	600	100
586A	WITS 17	Control	Feces	0	33.0106	DH_20_013	GF	WT	72316000000	753.296	10	600	100
586A	WITS 17	Control	Feces	3	18.5228	DH_20_013	GF	WT	77966000000	847.458	54.5131	600	100
586A	WITS 17	Control	Cecum	3	18.0322	DH_20_013	GF	WT	13636000000	275.213	10	600	100
586A	WITS 19	Control	Feces	0	15.6137	DH_20_013	GF	WT	72316000000	753.296	111.587	600	100
586A	WITS 19	Control	Feces	3	17.475	DH_20_013	GF	WT	77966000000	847.458	112.7	600	100
586A	WITS 19	Control	Cecum	3	16.5966	DH_20_013	GF	WT	13636000000	275.213	15.0374	600	100
586A	WITS 21	Control	Feces	0	14.2994	DH_20_013	GF	WT	72316000000	753.296	277.506	600	100
586A	WITS 21	Control	Feces	3	18.1724	DH_20_013	GF	WT	77966000000	847.458	69.5001	600	100
586A	WITS 21	Control	Cecum	3	15.144	DH_20_013	GF	WT	13636000000	275.213	41.1594	600	100
277A	WITS 02	HFD	Feces	0	31.76	DH_19_041	GF	WT	177780000000	52222.2	10	400	66.6667
277A	WITS 02	HFD	Cecum	3	30.4055	DH_19_041	GF	WT	122810000000	23391.8	10	400	66.6667
277A	WITS 02	HFD	Feces	3	29.0425	DH_19_041	GF	WT	33333000000	16666.7	10	400	66.6667
416A	WITS 17	HFD	Feces	3	34.6115	DH_20_002	GF	WT	376470000000	1960.78	10	190	31.6667
277A	WITS 01	HFD	Feces	0	17.4825	DH_19_041	GF	WT	177780000000	52222.2	465.287	400	66.6667
277A	WITS 11	HFD	Feces	0	12.3985	DH_19_041	GF	WT	177780000000	52222.2	15781.8	400	66.6667
277A	WITS 17	HFD	Feces	0	11.3195	DH_19_041	GF	WT	177780000000	52222.2	33340.3	400	66.6667
277A	WITS 19	HFD	Feces	0	17.9855	DH_19_041	GF	WT	177780000000	52222.2	328.324	400	66.6667
277A	WITS 21	HFD	Feces	0	15.173	DH_19_041	GF	WT	177780000000	52222.2	2306.48	400	66.6667
278A	WITS 01	HFD	Feces	0	15.0865	DH_19_041	GF	WT	234040000000	36170.2	2937.87	400	66.6667
278A	WITS 02	HFD	Feces	0	17.002	DH_19_041	GF	WT	234040000000	36170.2	778.77	400	66.6667
278A	WITS 11	HFD	Feces	0	14.2765	DH_19_041	GF	WT	234040000000	36170.2	5150.7	400	66.6667
278A	WITS 17	HFD	Feces	0	12.377	DH_19_041	GF	WT	234040000000	36170.2	19216.4	400	66.6667
278A	WITS 19	HFD	Feces	0	15.007	DH_19_041	GF	WT	234040000000	36170.2	3104.3	400	66.6667
278A	WITS 21	HFD	Feces	0	14.3245	DH_19_041	GF	WT	234040000000	36170.2	4982.15	400	66.6667
279A	WITS 01	HFD	Feces	0	14.371	DH_19_041	GF	WT	267860000000	46428.6	5193.2	400	66.6667
279A	WITS 02	HFD	Feces	0	18.268	DH_19_041	GF	WT	267860000000	46428.6	348.595	400	66.6667
279A	WITS 11	HFD	Feces	0	14.6285	DH_19_041	GF	WT	267860000000	46428.6	4344.3	400	66.6667
279A	WITS 17	HFD	Feces	0	13.4925	DH_19_041	GF	WT	267860000000	46428.6	9547.51	400	66.6667
279A	WITS 19	HFD	Feces	0	13.8345	DH_19_041	GF	WT	267860000000	46428.6	7532.48	400	66.6667
279A	WITS 21	HFD	Feces	0	12.465	DH_19_041	GF	WT	267860000000	46428.6	19462.5	400	66.6667
280A	WITS 01	HFD	Feces	0	14.414	DH_19_041	GF	WT	306120000000	21428.6	2143.33	400	66.6667
280A	WITS 02	HFD	Feces	0	15.5815	DH_19_041	GF	WT	306120000000	21428.6	954.195	400	66.6667
280A	WITS 11	HFD	Feces	0	12.9285	DH_19_041	GF	WT	306120000000	21428.6	6001.63	400	66.6667
280A	WITS 17	HFD	Feces	0	13.563	DH_19_041	GF	WT	306120000000	21428.6	3866.04	400	66.6667
280A	WITS 19	HFD	Feces	0	14.9085	DH_19_041	GF	WT	306120000000	21428.6	1521.35	400	66.6667
280A	WITS 21	HFD	Feces	0	12.7185	DH_19_041	GF	WT	306120000000	21428.6	6942.02	400	66.6667
281A	WITS 01	HFD	Feces	0	14.8115	DH_19_041	GF	WT	144440000000	16666.7	1221.32	400	66.6667
281A	WITS 02	HFD	Feces	0	17.561	DH_19_041	GF	WT	144440000000	16666.7	181.613	400	66.6667
281A	WITS 11	HFD	Feces	0	12.34	DH_19_041	GF	WT	144440000000	16666.7	6773.69	400	66.6667
281A	WITS 17	HFD	Feces	0	15.1725	DH_19_041	GF	WT	144440000000	16666.7	950.951	400	66.6667
281A	WITS 19	HFD	Feces	0	14.71	DH_19_041	GF	WT	144440000000	16666.7	1310.34	400	66.6667
281A	WITS 21	HFD	Feces	0	12.461	DH_19_041	GF	WT	144440000000	16666.7	6228.75	400	66.6667
277A	WITS 01	HFD	Cecum	3	15.621	DH_19_041	GF	WT	122810000000	23391.8	3295.65	400	66.6667
277A	WITS 11	HFD	Cecum	3	15.309	DH_19_041	GF	WT	122810000000	23391.8	4091.31	400	66.6667
277A	WITS 17	HFD	Cecum	3	13.4525	DH_19_041	GF	WT	122810000000	23391.8	14815.8	400	66.6667
277A	WITS 19	HFD	Cecum	3	18.976	DH_19_041	GF	WT	122810000000	23391.8	322.096	400	66.6667
277A	WITS 21	HFD	Cecum	3	17.5475	DH_19_041	GF	WT	122810000000	23391.8	866.975	400	66.6667
278A	WITS 01	HFD	Cecum	3	16.62	DH_19_041	GF	WT	38961000000	8311.69	435.801	400	66.6667
278A	WITS 02	HFD	Cecum	3	18.356	DH_19_041	GF	WT	38961000000	8311.69	130.828	400	66.6667
278A	WITS 11	HFD	Cecum	3	15.5935	DH_19_041	GF	WT	38961000000	8311.69	887.76	400	66.6667
278A	WITS 17	HFD	Cecum	3	13.0525	DH_19_041	GF	WT	38961000000	8311.69	5166.69	400	66.6667
278A	WITS 19	HFD	Cecum	3	15.617	DH_19_041	GF	WT	38961000000	8311.69	873.416	400	66.6667
278A	WITS 21	HFD	Cecum	3	15.713	DH_19_041	GF	WT	38961000000	8311.69	817.189	400	66.6667
279A	WITS 01	HFD	Cecum	3	15.4665	DH_19_041	GF	WT	37825000000	9456.26	1313.84	400	66.6667
279A	WITS 02	HFD	Cecum	3	21.0355	DH_19_041	GF	WT	37825000000	9456.26	27.6761	400	66.6667
279A	WITS 11	HFD	Cecum	3	16.8135	DH_19_041	GF	WT	37825000000	9456.26	516.481	400	66.6667
279A	WITS 17	HFD	Cecum	3	15.562	DH_19_041	GF	WT	37825000000	9456.26	1229.68	400	66.6667
279A	WITS 19	HFD	Cecum	3	16.111	DH_19_041	GF	WT	37825000000	9456.26	840.48	400	66.6667
279A	WITS 21	HFD	Cecum	3	13.3935	DH_19_041	GF	WT	37825000000	9456.26	5528.11	400	66.6667
280A	WITS 01	HFD	Cecum	3	17.296	DH_19_041	GF	WT	237110000000	6958.76	404.755	400	66.6667
280A	WITS 02	HFD	Cecum	3	18.6135	DH_19_041	GF	WT	237110000000	6958.76	162.4	400	66.6667
280A	WITS 11	HFD	Cecum	3	15.0065	DH_19_041	GF	WT	237110000000	6958.76	1978.79	400	66.6667
280A	WITS 17	HFD	Cecum	3	15.991	DH_19_041	GF	WT	237110000000	6958.76	1000.08	400	66.6667
280A	WITS 19	HFD	Cecum	3	16.184	DH_19_041	GF	WT	237110000000	6958.76	874.858	400	66.6667
280A	WITS 21	HFD	Cecum	3	14.6475	DH_19_041	GF	WT	237110000000	6958.76	2537.87	400	66.6667
281A	WITS 01	HFD	Cecum	3	16.1205	DH_19_041	GF	WT	42453000000	33018.9	3021.58	400	66.6667
281A	WITS 02	HFD	Cecum	3	18.799	DH_19_041	GF	WT	42453000000	33018.9	471.981	400	66.6667
281A	WITS 11	HFD	Cecum	3	14.624	DH_19_041	GF	WT	42453000000	33018.9	8525.6	400	66.6667
281A	WITS 17	HFD	Cecum	3	16.773	DH_19_041	GF	WT	42453000000	33018.9	1922.26	400	66.6667
281A	WITS 19	HFD	Cecum	3	16.4285	DH_19_041	GF	WT	42453000000	33018.9	2440.71	400	66.6667
281A	WITS 21	HFD	Cecum	3	13.6595	DH_19_041	GF	WT	42453000000	33018.9	16636.7	400	66.6667
277A	WITS 01	HFD	Feces	3	16.488	DH_19_041	GF	WT	33333000000	16666.7	1484	400	66.6667
277A	WITS 11	HFD	Feces	3	16.5245	DH_19_041	GF	WT	33333000000	16666.7	1446.93	400	66.6667
277A	WITS 17	HFD	Feces	3	13.529	DH_19_041	GF	WT	33333000000	16666.7	11539.4	400	66.6667
277A	WITS 19	HFD	Feces	3	18.3115	DH_19_041	GF	WT	33333000000	16666.7	419.283	400	66.6667
277A	WITS 21	HFD	Feces	3	16.228	DH_19_041	GF	WT	33333000000	16666.7	1777.06	400	66.6667
278A	WITS 01	HFD	Feces	3	17.984	DH_19_041	GF	WT	37500000000	35000	787.063	400	66.6667
278A	WITS 02	HFD	Feces	3	22.2315	DH_19_041	GF	WT	37500000000	35000	41.4366	400	66.6667
278A	WITS 11	HFD	Feces	3	15.8105	DH_19_041	GF	WT	37500000000	35000	3550.57	400	66.6667
278A	WITS 17	HFD	Feces	3	12.8495	DH_19_041	GF	WT	37500000000	35000	27647	400	66.6667
278A	WITS 19	HFD	Feces	3	17.1635	DH_19_041	GF	WT	37500000000	35000	1389.97	400	66.6667
278A	WITS 21	HFD	Feces	3	16.975	DH_19_041	GF	WT	37500000000	35000	1583.98	400	66.6667
279A	WITS 01	HFD	Feces	3	16.278	DH_19_041	GF	WT	170450000000	35227.3	5345.7	400	66.6667
279A	WITS 02	HFD	Feces	3	24.1275	DH_19_041	GF	WT	170450000000	35227.3	23.1776	400	66.6667
279A	WITS 11	HFD	Feces	3	19.413	DH_19_041	GF	WT	170450000000	35227.3	608.521	400	66.6667
279A	WITS 17	HFD	Feces	3	17.134	DH_19_041	GF	WT	170450000000	35227.3	2953.4	400	66.6667
279A	WITS 19	HFD	Feces	3	16.4105	DH_19_041	GF	WT	170450000000	35227.3	4876.61	400	66.6667
279A	WITS 21	HFD	Feces	3	14.2755	DH_19_041	GF	WT	170450000000	35227.3	21419.9	400	66.6667
280A	WITS 01	HFD	Feces	3	19.129	DH_19_041	GF	WT	86957000000	8695.65	408.307	400	66.6667
280A	WITS 02	HFD	Feces	3	22.6085	DH_19_041	GF	WT	86957000000	8695.65	36.6061	400	66.6667
280A	WITS 11	HFD	Feces	3	16.093	DH_19_041	GF	WT	86957000000	8695.65	3348.99	400	66.6667
280A	WITS 17	HFD	Feces	3	19.081	DH_19_041	GF	WT	86957000000	8695.65	422.12	400	66.6667
280A	WITS 19	HFD	Feces	3	18.7715	DH_19_041	GF	WT	86957000000	8695.65	523.124	400	66.6667
280A	WITS 21	HFD	Feces	3	15.8525	DH_19_041	GF	WT	86957000000	8695.65	3956.5	400	66.6667
281A	WITS 01	HFD	Feces	3	19.493	DH_19_041	GF	WT	29412000000	19117.6	527.616	400	66.6667
281A	WITS 02	HFD	Feces	3	26.4325	DH_19_041	GF	WT	29412000000	19117.6	10	400	66.6667
281A	WITS 11	HFD	Feces	3	15.3275	DH_19_041	GF	WT	29412000000	19117.6	9468	400	66.6667
281A	WITS 17	HFD	Feces	3	18.6095	DH_19_041	GF	WT	29412000000	19117.6	973.37	400	66.6667
281A	WITS 19	HFD	Feces	3	18.929	DH_19_041	GF	WT	29412000000	19117.6	780.007	400	66.6667
281A	WITS 21	HFD	Feces	3	15.69	DH_19_041	GF	WT	29412000000	19117.6	7364.36	400	66.6667
416A	WITS 01	HFD	Feces	0	15.558	DH_20_002	GF	WT	324640000000	6521.74	723.713	190	31.6667
416A	WITS 02	HFD	Feces	0	14.215	DH_20_002	GF	WT	324640000000	6521.74	1835.9	190	31.6667
416A	WITS 11	HFD	Feces	0	14.3625	DH_20_002	GF	WT	324640000000	6521.74	1657.48	190	31.6667
416A	WITS 17	HFD	Feces	0	18.9345	DH_20_002	GF	WT	324640000000	6521.74	69.6848	190	31.6667
416A	WITS 19	HFD	Feces	0	15.6345	DH_20_002	GF	WT	324640000000	6521.74	686.337	190	31.6667
416A	WITS 21	HFD	Feces	0	14.4605	DH_20_002	GF	WT	324640000000	6521.74	1548.63	190	31.6667
417A	WITS 01	HFD	Feces	0	14.1625	DH_20_002	GF	WT	447310000000	8602.15	1038.6	190	31.6667
417A	WITS 02	HFD	Feces	0	16.048	DH_20_002	GF	WT	447310000000	8602.15	281.098	190	31.6667
417A	WITS 11	HFD	Feces	0	13.939	DH_20_002	GF	WT	447310000000	8602.15	1212.63	190	31.6667
417A	WITS 17	HFD	Feces	0	16.962	DH_20_002	GF	WT	447310000000	8602.15	149.182	190	31.6667
417A	WITS 19	HFD	Feces	0	12.3625	DH_20_002	GF	WT	447310000000	8602.15	3616.63	190	31.6667
417A	WITS 21	HFD	Feces	0	13.013	DH_20_002	GF	WT	447310000000	8602.15	2304.01	190	31.6667
418A	WITS 01	HFD	Feces	0	13.6705	DH_20_002	GF	WT	758760000000	11855.7	2247.07	190	31.6667
418A	WITS 02	HFD	Feces	0	14.541	DH_20_002	GF	WT	758760000000	11855.7	1229.05	190	31.6667
418A	WITS 11	HFD	Feces	0	12.7695	DH_20_002	GF	WT	758760000000	11855.7	4196.09	190	31.6667
418A	WITS 17	HFD	Feces	0	18.523	DH_20_002	GF	WT	758760000000	11855.7	77.7801	190	31.6667
418A	WITS 19	HFD	Feces	0	14.822	DH_20_002	GF	WT	758760000000	11855.7	1011.53	190	31.6667
418A	WITS 21	HFD	Feces	0	13.209	DH_20_002	GF	WT	758760000000	11855.7	3094.15	190	31.6667
416A	WITS 01	HFD	Feces	3	16.0455	DH_20_002	GF	WT	376470000000	1960.78	98.7611	190	31.6667
416A	WITS 02	HFD	Feces	3	14.7845	DH_20_002	GF	WT	376470000000	1960.78	236.693	190	31.6667
416A	WITS 11	HFD	Feces	3	14.767	DH_20_002	GF	WT	376470000000	1960.78	239.581	190	31.6667
416A	WITS 19	HFD	Feces	3	13.595	DH_20_002	GF	WT	376470000000	1960.78	539.833	190	31.6667
416A	WITS 21	HFD	Feces	3	12.947	DH_20_002	GF	WT	376470000000	1960.78	845.916	190	31.6667
417A	WITS 01	HFD	Feces	3	13.5305	DH_20_002	GF	WT	203170000000	2698.41	649.64	190	31.6667
417A	WITS 02	HFD	Feces	3	18.459	DH_20_002	GF	WT	203170000000	2698.41	21.3327	190	31.6667
417A	WITS 11	HFD	Feces	3	15.015	DH_20_002	GF	WT	203170000000	2698.41	232.163	190	31.6667
417A	WITS 17	HFD	Feces	3	16.2635	DH_20_002	GF	WT	203170000000	2698.41	97.7142	190	31.6667
417A	WITS 19	HFD	Feces	3	12.9265	DH_20_002	GF	WT	203170000000	2698.41	987.404	190	31.6667
417A	WITS 21	HFD	Feces	3	13.402	DH_20_002	GF	WT	203170000000	2698.41	710.158	190	31.6667
418A	WITS 01	HFD	Feces	3	13.6845	DH_20_002	GF	WT	120000000000	11250	2738.34	190	31.6667
418A	WITS 02	HFD	Feces	3	14.6425	DH_20_002	GF	WT	120000000000	11250	1409.61	190	31.6667
418A	WITS 11	HFD	Feces	3	13.3355	DH_20_002	GF	WT	120000000000	11250	3487.76	190	31.6667
418A	WITS 17	HFD	Feces	3	17.3455	DH_20_002	GF	WT	120000000000	11250	216.479	190	31.6667
418A	WITS 19	HFD	Feces	3	14.9645	DH_20_002	GF	WT	120000000000	11250	1127.64	190	31.6667
418A	WITS 21	HFD	Feces	3	13.955	DH_20_002	GF	WT	120000000000	11250	2270.17	190	31.6667
416A	WITS 01	HFD	Cecum	3	14.715	DH_20_002	GF	WT	95522000000	3233.83	423.478	190	31.6667
416A	WITS 02	HFD	Cecum	3	15.2845	DH_20_002	GF	WT	95522000000	3233.83	285.361	190	31.6667
416A	WITS 11	HFD	Cecum	3	14.5165	DH_20_002	GF	WT	95522000000	3233.83	485.943	190	31.6667
416A	WITS 17	HFD	Cecum	3	18.005	DH_20_002	GF	WT	95522000000	3233.83	43.2954	190	31.6667
416A	WITS 19	HFD	Cecum	3	13.374	DH_20_002	GF	WT	95522000000	3233.83	1072.78	190	31.6667
416A	WITS 21	HFD	Cecum	3	13.591	DH_20_002	GF	WT	95522000000	3233.83	922.972	190	31.6667
417A	WITS 01	HFD	Cecum	3	14.2345	DH_20_002	GF	WT	465190000000	5063.29	684.15	190	31.6667
417A	WITS 02	HFD	Cecum	3	18.6215	DH_20_002	GF	WT	465190000000	5063.29	32.6989	190	31.6667
417A	WITS 11	HFD	Cecum	3	14.071	DH_20_002	GF	WT	465190000000	5063.29	766.248	190	31.6667
417A	WITS 17	HFD	Cecum	3	15.9095	DH_20_002	GF	WT	465190000000	5063.29	214.253	190	31.6667
417A	WITS 19	HFD	Cecum	3	12.979	DH_20_002	GF	WT	465190000000	5063.29	1633.41	190	31.6667
417A	WITS 21	HFD	Cecum	3	12.894	DH_20_002	GF	WT	465190000000	5063.29	1732.53	190	31.6667
418A	WITS 01	HFD	Cecum	3	14.4265	DH_20_002	GF	WT	1634800000000	7022.47	1261.07	190	31.6667
418A	WITS 02	HFD	Cecum	3	16.0175	DH_20_002	GF	WT	1634800000000	7022.47	418.601	190	31.6667
418A	WITS 11	HFD	Cecum	3	13.993	DH_20_002	GF	WT	1634800000000	7022.47	1703.08	190	31.6667
418A	WITS 17	HFD	Cecum	3	20.578	DH_20_002	GF	WT	1634800000000	7022.47	17.74	190	31.6667
418A	WITS 19	HFD	Cecum	3	15.0935	DH_20_002	GF	WT	1634800000000	7022.47	794.241	190	31.6667
418A	WITS 21	HFD	Cecum	3	13.2615	DH_20_002	GF	WT	1634800000000	7022.47	2827.74	190	31.6667
587A	WITS 01	HFD	Feces	0	13.0106	DH_20_013	GF	WT	57300000000	1205.23	438.121	600	100
587A	WITS 01	HFD	Feces	3	17.0985	DH_20_013	GF	WT	37209000000	581.395	74.9001	600	100
587A	WITS 01	HFD	Cecum	3	15.6264	DH_20_013	GF	WT	12785000000	393.608	50.958	600	100
587A	WITS 02	HFD	Feces	0	15.4615	DH_20_013	GF	WT	57300000000	1205.23	80.1292	600	100
587A	WITS 02	HFD	Feces	3	17.3146	DH_20_013	GF	WT	37209000000	581.395	64.4805	600	100
587A	WITS 02	HFD	Cecum	3	14.3016	DH_20_013	GF	WT	12785000000	393.608	127.653	600	100
587A	WITS 11	HFD	Feces	0	14.3275	DH_20_013	GF	WT	57300000000	1205.23	175.854	600	100
587A	WITS 11	HFD	Feces	3	15.0791	DH_20_013	GF	WT	37209000000	581.395	303.637	600	100
587A	WITS 11	HFD	Cecum	3	14.3766	DH_20_013	GF	WT	12785000000	393.608	121.186	600	100
587A	WITS 17	HFD	Feces	0	14.9606	DH_20_013	GF	WT	57300000000	1205.23	113.395	600	100
587A	WITS 17	HFD	Feces	3	36.1778	DH_20_013	GF	WT	37209000000	581.395	10	600	100
587A	WITS 17	HFD	Cecum	3	18.5557	DH_20_013	GF	WT	12785000000	393.608	10	600	100
587A	WITS 19	HFD	Feces	0	14.1432	DH_20_013	GF	WT	57300000000	1205.23	199.816	600	100
587A	WITS 19	HFD	Feces	3	17.1625	DH_20_013	GF	WT	37209000000	581.395	71.6491	600	100
587A	WITS 19	HFD	Cecum	3	15.3475	DH_20_013	GF	WT	12785000000	393.608	61.8257	600	100
587A	WITS 21	HFD	Feces	0	14.157	DH_20_013	GF	WT	57300000000	1205.23	197.919	600	100
587A	WITS 21	HFD	Feces	3	17.2651	DH_20_013	GF	WT	37209000000	581.395	66.7292	600	100
587A	WITS 21	HFD	Cecum	3	16.6369	DH_20_013	GF	WT	12785000000	393.608	25.2945	600	100
588A	WITS 01	HFD	Feces	0	15.0448	DH_20_013	GF	WT	72258000000	870.968	71.5512	600	100
588A	WITS 01	HFD	Feces	3	34.2149	DH_20_013	GF	WT	43761000000	341.88	10	600	100
588A	WITS 01	HFD	Cecum	3	15.9436	DH_20_013	GF	WT	13854000000	246.296	33.8336	600	100
588A	WITS 02	HFD	Feces	0	13.7356	DH_20_013	GF	WT	72258000000	870.968	177.31	600	100
588A	WITS 02	HFD	Feces	3	17.275	DH_20_013	GF	WT	43761000000	341.88	57.7313	600	100
588A	WITS 02	HFD	Cecum	3	15.4644	DH_20_013	GF	WT	13854000000	246.296	47.1633	600	100
588A	WITS 11	HFD	Feces	0	15.6777	DH_20_013	GF	WT	72258000000	870.968	46.14	600	100
588A	WITS 11	HFD	Feces	3	37.9214	DH_20_013	GF	WT	43761000000	341.88	10	600	100
588A	WITS 11	HFD	Cecum	3	16.6515	DH_20_013	GF	WT	13854000000	246.296	20.7131	600	100
588A	WITS 17	HFD	Feces	0	15.5445	DH_20_013	GF	WT	72258000000	870.968	50.6047	600	100
588A	WITS 17	HFD	Feces	3	17.9354	DH_20_013	GF	WT	43761000000	341.88	36.5263	600	100
588A	WITS 17	HFD	Cecum	3	16.4495	DH_20_013	GF	WT	13854000000	246.296	23.8259	600	100
588A	WITS 19	HFD	Feces	0	12.5995	DH_20_013	GF	WT	72258000000	870.968	389.705	600	100
588A	WITS 19	HFD	Feces	3	17.4062	DH_20_013	GF	WT	43761000000	341.88	52.7104	600	100
588A	WITS 19	HFD	Cecum	3	15.3263	DH_20_013	GF	WT	13854000000	246.296	51.9018	600	100
588A	WITS 21	HFD	Feces	0	14.1219	DH_20_013	GF	WT	72258000000	870.968	135.657	600	100
588A	WITS 21	HFD	Feces	3	15.5196	DH_20_013	GF	WT	43761000000	341.88	194.912	600	100
588A	WITS 21	HFD	Cecum	3	14.9184	DH_20_013	GF	WT	13854000000	246.296	68.8582	600	100
589A	WITS 01	HFD	Feces	0	31.4579	DH_20_013	GF	WT	71529000000	529.412	10	600	100
589A	WITS 01	HFD	Feces	3	16.9011	DH_20_013	GF	WT	79051000000	642.292	132.82	600	100
589A	WITS 01	HFD	Cecum	3	15.0397	DH_20_013	GF	WT	24449000000	383.795	58.9957	600	100
589A	WITS 02	HFD	Feces	0	15.1622	DH_20_013	GF	WT	71529000000	529.412	59.7161	600	100
589A	WITS 02	HFD	Feces	3	33.7913	DH_20_013	GF	WT	79051000000	642.292	10	600	100
589A	WITS 02	HFD	Cecum	3	16.5684	DH_20_013	GF	WT	24449000000	383.795	20.4485	600	100
589A	WITS 11	HFD	Feces	0	13.6827	DH_20_013	GF	WT	71529000000	529.412	166.522	600	100
589A	WITS 11	HFD	Feces	3	15.6002	DH_20_013	GF	WT	79051000000	642.292	327.246	600	100
589A	WITS 11	HFD	Cecum	3	14.0966	DH_20_013	GF	WT	24449000000	383.795	113.428	600	100
589A	WITS 17	HFD	Feces	0	15.1301	DH_20_013	GF	WT	71529000000	529.412	61.0591	600	100
589A	WITS 17	HFD	Feces	3	36.8179	DH_20_013	GF	WT	79051000000	642.292	10	600	100
589A	WITS 17	HFD	Cecum	3	17.6643	DH_20_013	GF	WT	24449000000	383.795	10	600	100
589A	WITS 19	HFD	Feces	0	13.8268	DH_20_013	GF	WT	71529000000	529.412	150.692	600	100
589A	WITS 19	HFD	Feces	3	17.7246	DH_20_013	GF	WT	79051000000	642.292	75.0499	600	100
589A	WITS 19	HFD	Cecum	3	15.0201	DH_20_013	GF	WT	24449000000	383.795	59.8031	600	100
589A	WITS 21	HFD	Feces	0	14.5478	DH_20_013	GF	WT	71529000000	529.412	91.4219	600	100
589A	WITS 21	HFD	Feces	3	17.2106	DH_20_013	GF	WT	79051000000	642.292	107.176	600	100
589A	WITS 21	HFD	Cecum	3	13.9968	DH_20_013	GF	WT	24449000000	383.795	121.553	600	100
590A	WITS 01	HFD	Feces	0	13.0687	DH_20_013	GF	WT	150940000000	2594.34	875.831	600	100
590A	WITS 01	HFD	Feces	3	16.6434	DH_20_013	GF	WT	42694000000	1435.83	490.112	600	100
590A	WITS 01	HFD	Cecum	3	15.0752	DH_20_013	GF	WT	23130000000	661.366	113.733	600	100
590A	WITS 02	HFD	Feces	0	14.0768	DH_20_013	GF	WT	150940000000	2594.34	435.461	600	100
590A	WITS 02	HFD	Feces	3	18.9278	DH_20_013	GF	WT	42694000000	1435.83	100.608	600	100
590A	WITS 02	HFD	Cecum	3	14.4053	DH_20_013	GF	WT	23130000000	661.366	180.947	600	100
590A	WITS 11	HFD	Feces	0	13.6016	DH_20_013	GF	WT	150940000000	2594.34	605.343	600	100
590A	WITS 11	HFD	Feces	3	17.9296	DH_20_013	GF	WT	42694000000	1435.83	200.966	600	100
590A	WITS 11	HFD	Cecum	3	14.3446	DH_20_013	GF	WT	23130000000	661.366	188.719	600	100
590A	WITS 17	HFD	Feces	0	17.309	DH_20_013	GF	WT	150940000000	2594.34	46.3417	600	100
590A	WITS 17	HFD	Feces	3	18.203	DH_20_013	GF	WT	42694000000	1435.83	166.272	600	100
590A	WITS 17	HFD	Cecum	3	16.773	DH_20_013	GF	WT	23130000000	661.366	35.0587	600	100
590A	WITS 19	HFD	Feces	0	15.1363	DH_20_013	GF	WT	150940000000	2594.34	208.937	600	100
590A	WITS 19	HFD	Feces	3	20.3197	DH_20_013	GF	WT	42694000000	1435.83	38.3373	600	100
590A	WITS 19	HFD	Cecum	3	16.9207	DH_20_013	GF	WT	23130000000	661.366	31.6481	600	100
590A	WITS 21	HFD	Feces	0	14.1207	DH_20_013	GF	WT	150940000000	2594.34	422.426	600	100
590A	WITS 21	HFD	Feces	3	16.8005	DH_20_013	GF	WT	42694000000	1435.83	439.538	600	100
590A	WITS 21	HFD	Cecum	3	15.1069	DH_20_013	GF	WT	23130000000	661.366	111.261	600	100
591A	WITS 01	HFD	Feces	0	16.6311	DH_20_013	GF	WT	33333000000	737.847	26.1797	600	100
591A	WITS 01	HFD	Feces	3	35.4662	DH_20_013	GF	WT	28319000000	619.469	10	600	100
591A	WITS 01	HFD	Cecum	3	15.331	DH_20_013	GF	WT	21402000000	436.062	58.9	600	100
591A	WITS 02	HFD	Feces	0	14.0825	DH_20_013	GF	WT	33333000000	737.847	153.176	600	100
591A	WITS 02	HFD	Feces	3	18.2651	DH_20_013	GF	WT	28319000000	619.469	45.6421	600	100
591A	WITS 02	HFD	Cecum	3	14.8543	DH_20_013	GF	WT	21402000000	436.062	81.9614	600	100
591A	WITS 11	HFD	Feces	0	13.0835	DH_20_013	GF	WT	33333000000	737.847	306.139	600	100
591A	WITS 11	HFD	Feces	3	15.0138	DH_20_013	GF	WT	28319000000	619.469	434.631	600	100
591A	WITS 11	HFD	Cecum	3	13.7524	DH_20_013	GF	WT	21402000000	436.062	175.913	600	100
591A	WITS 17	HFD	Feces	0	15.9028	DH_20_013	GF	WT	33333000000	737.847	43.3733	600	100
591A	WITS 17	HFD	Feces	3	20.0917	DH_20_013	GF	WT	28319000000	619.469	12.8683	600	100
591A	WITS 17	HFD	Cecum	3	15.5635	DH_20_013	GF	WT	21402000000	436.062	50.1333	600	100
591A	WITS 19	HFD	Feces	0	14.3242	DH_20_013	GF	WT	33333000000	737.847	129.547	600	100
591A	WITS 19	HFD	Feces	3	34.4314	DH_20_013	GF	WT	28319000000	619.469	10	600	100
591A	WITS 19	HFD	Cecum	3	15.2313	DH_20_013	GF	WT	21402000000	436.062	63.1153	600	100
591A	WITS 21	HFD	Feces	0	15.0299	DH_20_013	GF	WT	33333000000	737.847	79.4328	600	100
591A	WITS 21	HFD	Feces	3	16.7964	DH_20_013	GF	WT	28319000000	619.469	126.328	600	100
591A	WITS 21	HFD	Cecum	3	18.6169	DH_20_013	GF	WT	21402000000	436.062	10	600	100
419A	WITS 01	Stm attenuated	Feces	0	13.2075	DH_20_002	GF	WT	702440000000	21951.2	7006.65	190	31.6667
419A	WITS 02	Stm attenuated	Feces	0	15.2465	DH_20_002	GF	WT	702440000000	21951.2	1704.94	190	31.6667
419A	WITS 11	Stm attenuated	Feces	0	13.4865	DH_20_002	GF	WT	702440000000	21951.2	5774.61	190	31.6667
419A	WITS 17	Stm attenuated	Feces	0	17.836	DH_20_002	GF	WT	702440000000	21951.2	283.265	190	31.6667
419A	WITS 19	Stm attenuated	Feces	0	14.8335	DH_20_002	GF	WT	702440000000	21951.2	2270.05	190	31.6667
419A	WITS 21	Stm attenuated	Feces	0	13.72	DH_20_002	GF	WT	702440000000	21951.2	4911.7	190	31.6667
420A	WITS 01	Stm attenuated	Feces	0	15.1305	DH_20_002	GF	WT	411430000000	7142.86	460.924	190	31.6667
420A	WITS 02	Stm attenuated	Feces	0	15.8615	DH_20_002	GF	WT	411430000000	7142.86	277.7	190	31.6667
420A	WITS 11	Stm attenuated	Feces	0	15.5925	DH_20_002	GF	WT	411430000000	7142.86	334.621	190	31.6667
420A	WITS 17	Stm attenuated	Feces	0	16.9105	DH_20_002	GF	WT	411430000000	7142.86	134.213	190	31.6667
420A	WITS 19	Stm attenuated	Feces	0	12.5265	DH_20_002	GF	WT	411430000000	7142.86	2802.28	190	31.6667
420A	WITS 21	Stm attenuated	Feces	0	12.3655	DH_20_002	GF	WT	411430000000	7142.86	3133.12	190	31.6667
421A	WITS 01	Stm attenuated	Feces	0	15.4235	DH_20_002	GF	WT	457140000000	21428.6	1144.21	190	31.6667
421A	WITS 02	Stm attenuated	Feces	0	16.7845	DH_20_002	GF	WT	457140000000	21428.6	445.457	190	31.6667
421A	WITS 11	Stm attenuated	Feces	0	13.999	DH_20_002	GF	WT	457140000000	21428.6	3071.32	190	31.6667
421A	WITS 17	Stm attenuated	Feces	0	16.477	DH_20_002	GF	WT	457140000000	21428.6	551.28	190	31.6667
421A	WITS 19	Stm attenuated	Feces	0	12.9705	DH_20_002	GF	WT	457140000000	21428.6	6265.19	190	31.6667
421A	WITS 21	Stm attenuated	Feces	0	12.303	DH_20_002	GF	WT	457140000000	21428.6	9951.11	190	31.6667
419A	WITS 01	Stm attenuated	Feces	3	12.4195	DH_20_002	GF	WT	101820000000	3181.82	1767.22	190	31.6667
419A	WITS 02	Stm attenuated	Feces	3	33.593	DH_20_002	GF	WT	101820000000	3181.82	10	190	31.6667
419A	WITS 11	Stm attenuated	Feces	3	30.916	DH_20_002	GF	WT	101820000000	3181.82	10	190	31.6667
419A	WITS 17	Stm attenuated	Feces	3	14.218	DH_20_002	GF	WT	101820000000	3181.82	508.029	190	31.6667
419A	WITS 19	Stm attenuated	Feces	3	13.3825	DH_20_002	GF	WT	101820000000	3181.82	906.566	190	31.6667
419A	WITS 21	Stm attenuated	Feces	3	30.533	DH_20_002	GF	WT	101820000000	3181.82	10	190	31.6667
419A	WITS 01	Stm attenuated	Cecum	3	13.9455	DH_20_002	GF	WT	377010000000	1604.28	313.638	190	31.6667
419A	WITS 02	Stm attenuated	Cecum	3	15.913	DH_20_002	GF	WT	377010000000	1604.28	80.1959	190	31.6667
419A	WITS 11	Stm attenuated	Cecum	3	13.588	DH_20_002	GF	WT	377010000000	1604.28	401.834	190	31.6667
419A	WITS 17	Stm attenuated	Cecum	3	17.9205	DH_20_002	GF	WT	377010000000	1604.28	19.945	190	31.6667
419A	WITS 19	Stm attenuated	Cecum	3	14.482	DH_20_002	GF	WT	377010000000	1604.28	216.235	190	31.6667
419A	WITS 21	Stm attenuated	Cecum	3	13.0775	DH_20_002	GF	WT	377010000000	1604.28	572.43	190	31.6667
420A	WITS 01	Stm attenuated	Feces	3	34.206	DH_20_002	GF	WT	3529411765	0	10	190	31.6667
420A	WITS 02	Stm attenuated	Feces	3	35.9415	DH_20_002	GF	WT	3529411765	0	10	190	31.6667
420A	WITS 11	Stm attenuated	Feces	3	35.1315	DH_20_002	GF	WT	3529411765	0	10	190	31.6667
420A	WITS 17	Stm attenuated	Feces	3	35.571	DH_20_002	GF	WT	3529411765	0	10	190	31.6667
420A	WITS 19	Stm attenuated	Feces	3	32.7955	DH_20_002	GF	WT	3529411765	0	10	190	31.6667
420A	WITS 21	Stm attenuated	Feces	3	32.6455	DH_20_002	GF	WT	3529411765	0	10	190	31.6667
421A	WITS 01	Stm attenuated	Feces	3	31.435	DH_20_002	GF	WT	1931034483	0	10	190	31.6667
421A	WITS 02	Stm attenuated	Feces	3	34.2855	DH_20_002	GF	WT	1931034483	0	10	190	31.6667
421A	WITS 11	Stm attenuated	Feces	3	34.8225	DH_20_002	GF	WT	1931034483	0	10	190	31.6667
421A	WITS 17	Stm attenuated	Feces	3	34.199	DH_20_002	GF	WT	1931034483	0	10	190	31.6667
421A	WITS 19	Stm attenuated	Feces	3	32.3555	DH_20_002	GF	WT	1931034483	0	10	190	31.6667
421A	WITS 21	Stm attenuated	Feces	3	32.2015	DH_20_002	GF	WT	1931034483	0	10	190	31.6667
420A	WITS 01	Stm attenuated	Cecum	3	15.684	DH_20_002	GF	WT	44755000000	792.541	70.6137	190	31.6667
420A	WITS 02	Stm attenuated	Cecum	3	19.314	DH_20_002	GF	WT	44755000000	792.541	10	190	31.6667
420A	WITS 11	Stm attenuated	Cecum	3	15.7835	DH_20_002	GF	WT	44755000000	792.541	65.9078	190	31.6667
420A	WITS 17	Stm attenuated	Cecum	3	15.294	DH_20_002	GF	WT	44755000000	792.541	92.5317	190	31.6667
420A	WITS 19	Stm attenuated	Cecum	3	14.1205	DH_20_002	GF	WT	44755000000	792.541	208.713	190	31.6667
420A	WITS 21	Stm attenuated	Cecum	3	13.3785	DH_20_002	GF	WT	44755000000	792.541	349.071	190	31.6667
421A	WITS 01	Stm attenuated	Cecum	3	14.8735	DH_20_002	GF	WT	105490000000	329.67	60.8092	190	31.6667
421A	WITS 02	Stm attenuated	Cecum	3	33.6435	DH_20_002	GF	WT	105490000000	329.67	10	190	31.6667
421A	WITS 11	Stm attenuated	Cecum	3	34.8805	DH_20_002	GF	WT	105490000000	329.67	10	190	31.6667
421A	WITS 17	Stm attenuated	Cecum	3	33.8275	DH_20_002	GF	WT	105490000000	329.67	10	190	31.6667
421A	WITS 19	Stm attenuated	Cecum	3	32.4715	DH_20_002	GF	WT	105490000000	329.67	10	190	31.6667
421A	WITS 21	Stm attenuated	Cecum	3	12.729	DH_20_002	GF	WT	105490000000	329.67	268.861	190	31.6667
798A	WITS 01	Stm attenuated	Cecum	3	18.834	DH_20_021	GF	WT	7207207207	64.3501	10	900	150
798A	WITS 02	Stm attenuated	Cecum	3	17.718	DH_20_021	GF	WT	7207207207	64.3501	13.1541	900	150
798A	WITS 11	Stm attenuated	Cecum	3	16.431	DH_20_021	GF	WT	7207207207	64.3501	32.0987	900	150
798A	WITS 17	Stm attenuated	Cecum	3	34.9985	DH_20_021	GF	WT	7207207207	64.3501	10	900	150
798A	WITS 19	Stm attenuated	Cecum	3	21.3775	DH_20_021	GF	WT	7207207207	64.3501	10	900	150
798A	WITS 21	Stm attenuated	Cecum	3	17.852	DH_20_021	GF	WT	7207207207	64.3501	11.9874	900	150
799A	WITS 01	Stm attenuated	Cecum	3	21.6215	DH_20_021	GF	WT	8510638298	319.149	10	900	150
799A	WITS 02	Stm attenuated	Cecum	3	22.0705	DH_20_021	GF	WT	8510638298	319.149	10	900	150
799A	WITS 11	Stm attenuated	Cecum	3	16.771	DH_20_021	GF	WT	8510638298	319.149	135.438	900	150
799A	WITS 17	Stm attenuated	Cecum	3	17.58	DH_20_021	GF	WT	8510638298	319.149	77.3047	900	150
799A	WITS 19	Stm attenuated	Cecum	3	20.671	DH_20_021	GF	WT	8510638298	319.149	10	900	150
799A	WITS 21	Stm attenuated	Cecum	3	17.3735	DH_20_021	GF	WT	8510638298	319.149	89.2008	900	150
800A	WITS 01	Stm attenuated	Cecum	3	19.3875	DH_20_021	GF	WT	7308021696	42.8204	10	900	150
800A	WITS 02	Stm attenuated	Cecum	3	21.368	DH_20_021	GF	WT	7308021696	42.8204	10	900	150
800A	WITS 11	Stm attenuated	Cecum	3	15.965	DH_20_021	GF	WT	7308021696	42.8204	24.3012	900	150
800A	WITS 17	Stm attenuated	Cecum	3	20.3695	DH_20_021	GF	WT	7308021696	42.8204	10	900	150
800A	WITS 19	Stm attenuated	Cecum	3	16.8785	DH_20_021	GF	WT	7308021696	42.8204	12.9014	900	150
800A	WITS 21	Stm attenuated	Cecum	3	19.8635	DH_20_021	GF	WT	7308021696	42.8204	10	900	150
801A	WITS 01	Stm attenuated	Cecum	3	32.929	DH_20_021	GF	WT	2786885246	34.153	10	900	150
801A	WITS 02	Stm attenuated	Cecum	3	36.367	DH_20_021	GF	WT	2786885246	34.153	10	900	150
801A	WITS 11	Stm attenuated	Cecum	3	16.7255	DH_20_021	GF	WT	2786885246	34.153	11.2166	900	150
801A	WITS 17	Stm attenuated	Cecum	3	35.7235	DH_20_021	GF	WT	2786885246	34.153	10	900	150
801A	WITS 19	Stm attenuated	Cecum	3	36.3705	DH_20_021	GF	WT	2786885246	34.153	10	900	150
801A	WITS 21	Stm attenuated	Cecum	3	15.6935	DH_20_021	GF	WT	2786885246	34.153	22.9364	900	150
802A	WITS 01	Stm attenuated	Cecum	3	34.556	DH_20_021	GF	WT	2338204593	0	10	900	150
802A	WITS 02	Stm attenuated	Cecum	3	38.246	DH_20_021	GF	WT	2338204593	0	10	900	150
802A	WITS 11	Stm attenuated	Cecum	3	34.943	DH_20_021	GF	WT	2338204593	0	10	900	150
802A	WITS 17	Stm attenuated	Cecum	3	36.149	DH_20_021	GF	WT	2338204593	0	10	900	150
802A	WITS 19	Stm attenuated	Cecum	3	38.083	DH_20_021	GF	WT	2338204593	0	10	900	150
802A	WITS 21	Stm attenuated	Cecum	3	36.29	DH_20_021	GF	WT	2338204593	0	10	900	150
803A	WITS 01	Stm attenuated	Cecum	3	34.049	DH_20_021	GF	WT	2398422091	19.7239	10	900	150
803A	WITS 02	Stm attenuated	Cecum	3	40	DH_20_021	GF	WT	2398422091	19.7239	10	900	150
803A	WITS 11	Stm attenuated	Cecum	3	14.1065	DH_20_021	GF	WT	2398422091	19.7239	19.7239	900	150
803A	WITS 17	Stm attenuated	Cecum	3	37.609	DH_20_021	GF	WT	2398422091	19.7239	10	900	150
803A	WITS 19	Stm attenuated	Cecum	3	36.608	DH_20_021	GF	WT	2398422091	19.7239	10	900	150
803A	WITS 21	Stm attenuated	Cecum	3	36.574	DH_20_021	GF	WT	2398422091	19.7239	10	900	150
798A	WITS 01	Stm attenuated	Feces	0	13.2665	DH_20_021	GF	WT	41026000000	1025.64	333.34	900	150
798A	WITS 02	Stm attenuated	Feces	0	18.5365	DH_20_021	GF	WT	41026000000	1025.64	10	900	150
798A	WITS 11	Stm attenuated	Feces	0	13.003	DH_20_021	GF	WT	41026000000	1025.64	400.137	900	150
798A	WITS 17	Stm attenuated	Feces	0	35.537	DH_20_021	GF	WT	41026000000	1025.64	10	900	150
798A	WITS 19	Stm attenuated	Feces	0	16.397	DH_20_021	GF	WT	41026000000	1025.64	38.0639	900	150
798A	WITS 21	Stm attenuated	Feces	0	13.708	DH_20_021	GF	WT	41026000000	1025.64	245.461	900	150
799A	WITS 01	Stm attenuated	Feces	0	18.1185	DH_20_021	GF	WT	61124000000	1853.93	20.8334	900	150
799A	WITS 02	Stm attenuated	Feces	0	17.8075	DH_20_021	GF	WT	61124000000	1853.93	25.8452	900	150
799A	WITS 11	Stm attenuated	Feces	0	12.228	DH_20_021	GF	WT	61124000000	1853.93	1235.88	900	150
799A	WITS 17	Stm attenuated	Feces	0	16.239	DH_20_021	GF	WT	61124000000	1853.93	76.6559	900	150
799A	WITS 19	Stm attenuated	Feces	0	16.268	DH_20_021	GF	WT	61124000000	1853.93	75.1304	900	150
799A	WITS 21	Stm attenuated	Feces	0	13.7865	DH_20_021	GF	WT	61124000000	1853.93	419.586	900	150
800A	WITS 01	Stm attenuated	Feces	0	14.2895	DH_20_021	GF	WT	55385000000	1250	222.053	900	150
800A	WITS 02	Stm attenuated	Feces	0	20.8225	DH_20_021	GF	WT	55385000000	1250	10	900	150
800A	WITS 11	Stm attenuated	Feces	0	12.5405	DH_20_021	GF	WT	55385000000	1250	746.375	900	150
800A	WITS 17	Stm attenuated	Feces	0	35.107	DH_20_021	GF	WT	55385000000	1250	10	900	150
800A	WITS 19	Stm attenuated	Feces	0	14.0535	DH_20_021	GF	WT	55385000000	1250	261.516	900	150
800A	WITS 21	Stm attenuated	Feces	0	17.942	DH_20_021	GF	WT	55385000000	1250	17.6581	900	150
801A	WITS 01	Stm attenuated	Feces	0	33.598	DH_20_021	GF	WT	8648648649	810.811	10	900	150
801A	WITS 02	Stm attenuated	Feces	0	36.6995	DH_20_021	GF	WT	8648648649	810.811	10	900	150
801A	WITS 11	Stm attenuated	Feces	0	12.8505	DH_20_021	GF	WT	8648648649	810.811	330.716	900	150
801A	WITS 17	Stm attenuated	Feces	0	17.7275	DH_20_021	GF	WT	8648648649	810.811	11.2547	900	150
801A	WITS 19	Stm attenuated	Feces	0	36.025	DH_20_021	GF	WT	8648648649	810.811	10	900	150
801A	WITS 21	Stm attenuated	Feces	0	12.347	DH_20_021	GF	WT	8648648649	810.811	468.84	900	150
802A	WITS 01	Stm attenuated	Feces	0	14.3015	DH_20_021	GF	WT	30476000000	119.048	20.8696	900	150
802A	WITS 02	Stm attenuated	Feces	0	38.4515	DH_20_021	GF	WT	30476000000	119.048	10	900	150
802A	WITS 11	Stm attenuated	Feces	0	35.1325	DH_20_021	GF	WT	30476000000	119.048	10	900	150
802A	WITS 17	Stm attenuated	Feces	0	37.5755	DH_20_021	GF	WT	30476000000	119.048	10	900	150
802A	WITS 19	Stm attenuated	Feces	0	35.646	DH_20_021	GF	WT	30476000000	119.048	10	900	150
802A	WITS 21	Stm attenuated	Feces	0	12.0675	DH_20_021	GF	WT	30476000000	119.048	98.1781	900	150
803A	WITS 01	Stm attenuated	Feces	0	16.1675	DH_20_021	GF	WT	42985000000	597.015	27.0397	900	150
803A	WITS 02	Stm attenuated	Feces	0	37.5455	DH_20_021	GF	WT	42985000000	597.015	10	900	150
803A	WITS 11	Stm attenuated	Feces	0	13.4935	DH_20_021	GF	WT	42985000000	597.015	172.566	900	150
803A	WITS 17	Stm attenuated	Feces	0	12.364	DH_20_021	GF	WT	42985000000	597.015	377.546	900	150
803A	WITS 19	Stm attenuated	Feces	0	33.884	DH_20_021	GF	WT	42985000000	597.015	10	900	150
803A	WITS 21	Stm attenuated	Feces	0	16.6125	DH_20_021	GF	WT	42985000000	597.015	19.8629	900	150
798A	WITS 01	Stm attenuated	Feces	3	34.599	DH_20_021	GF	WT	13073000000	88.8099	10	900	150
798A	WITS 02	Stm attenuated	Feces	3	36.1575	DH_20_021	GF	WT	13073000000	88.8099	10	900	150
798A	WITS 11	Stm attenuated	Feces	3	13.9745	DH_20_021	GF	WT	13073000000	88.8099	88.8099	900	150
798A	WITS 17	Stm attenuated	Feces	3	36.1575	DH_20_021	GF	WT	13073000000	88.8099	10	900	150
798A	WITS 19	Stm attenuated	Feces	3	37.4745	DH_20_021	GF	WT	13073000000	88.8099	10	900	150
798A	WITS 21	Stm attenuated	Feces	3	34.8925	DH_20_021	GF	WT	13073000000	88.8099	10	900	150
799A	WITS 01	Stm attenuated	Feces	3	34.0905	DH_20_021	GF	WT	1111111111	0	10	900	150
799A	WITS 02	Stm attenuated	Feces	3	40	DH_20_021	GF	WT	1111111111	0	10	900	150
799A	WITS 11	Stm attenuated	Feces	3	33.822	DH_20_021	GF	WT	1111111111	0	10	900	150
799A	WITS 17	Stm attenuated	Feces	3	35.537	DH_20_021	GF	WT	1111111111	0	10	900	150
799A	WITS 19	Stm attenuated	Feces	3	36.035	DH_20_021	GF	WT	1111111111	0	10	900	150
799A	WITS 21	Stm attenuated	Feces	3	36.0845	DH_20_021	GF	WT	1111111111	0	10	900	150
800A	WITS 01	Stm attenuated	Feces	3	34.8535	DH_20_021	GF	WT	833333333	0	10	900	150
800A	WITS 02	Stm attenuated	Feces	3	37.765	DH_20_021	GF	WT	833333333	0	10	900	150
800A	WITS 11	Stm attenuated	Feces	3	34.432	DH_20_021	GF	WT	833333333	0	10	900	150
800A	WITS 17	Stm attenuated	Feces	3	36.7785	DH_20_021	GF	WT	833333333	0	10	900	150
800A	WITS 19	Stm attenuated	Feces	3	36.2405	DH_20_021	GF	WT	833333333	0	10	900	150
800A	WITS 21	Stm attenuated	Feces	3	37.2165	DH_20_021	GF	WT	833333333	0	10	900	150
801A	WITS 01	Stm attenuated	Feces	3	34.3155	DH_20_021	GF	WT	1333333333	0	10	900	150
801A	WITS 02	Stm attenuated	Feces	3	36.2735	DH_20_021	GF	WT	1333333333	0	10	900	150
801A	WITS 11	Stm attenuated	Feces	3	32.678	DH_20_021	GF	WT	1333333333	0	10	900	150
801A	WITS 17	Stm attenuated	Feces	3	34.995	DH_20_021	GF	WT	1333333333	0	10	900	150
801A	WITS 19	Stm attenuated	Feces	3	35.879	DH_20_021	GF	WT	1333333333	0	10	900	150
801A	WITS 21	Stm attenuated	Feces	3	32.5585	DH_20_021	GF	WT	1333333333	0	10	900	150
802A	WITS 01	Stm attenuated	Feces	3	35.3775	DH_20_021	GF	WT	501043841	0	10	900	150
802A	WITS 02	Stm attenuated	Feces	3	35.6005	DH_20_021	GF	WT	501043841	0	10	900	150
802A	WITS 11	Stm attenuated	Feces	3	35.6295	DH_20_021	GF	WT	501043841	0	10	900	150
802A	WITS 17	Stm attenuated	Feces	3	35.4515	DH_20_021	GF	WT	501043841	0	10	900	150
802A	WITS 19	Stm attenuated	Feces	3	36.0005	DH_20_021	GF	WT	501043841	0	10	900	150
802A	WITS 21	Stm attenuated	Feces	3	36.035	DH_20_021	GF	WT	501043841	0	10	900	150
803A	WITS 01	Stm attenuated	Feces	3	35.098	DH_20_021	GF	WT	2962962963	0	10	900	150
803A	WITS 02	Stm attenuated	Feces	3	36.8055	DH_20_021	GF	WT	2962962963	0	10	900	150
803A	WITS 11	Stm attenuated	Feces	3	35.197	DH_20_021	GF	WT	2962962963	0	10	900	150
803A	WITS 17	Stm attenuated	Feces	3	35.7495	DH_20_021	GF	WT	2962962963	0	10	900	150
803A	WITS 19	Stm attenuated	Feces	3	37.1335	DH_20_021	GF	WT	2962962963	0	10	900	150
803A	WITS 21	Stm attenuated	Feces	3	37.0745	DH_20_021	GF	WT	2962962963	0	10	900	150
597A	WITS 01	Stm attenuated	Feces	0	15.3189	DH_20_013	GF	WT	99751000000	872.818	72.8008	600	100
597A	WITS 01	Stm attenuated	Cecum	3	34.2342	DH_20_013	GF	WT	4978687127	0	10	600	100
597A	WITS 02	Stm attenuated	Feces	0	14.2487	DH_20_013	GF	WT	99751000000	872.818	152.859	600	100
597A	WITS 02	Stm attenuated	Cecum	3	32.0618	DH_20_013	GF	WT	4978687127	0	10	600	100
597A	WITS 11	Stm attenuated	Feces	0	14.906	DH_20_013	GF	WT	99751000000	872.818	96.9262	600	100
597A	WITS 11	Stm attenuated	Cecum	3	33.4735	DH_20_013	GF	WT	4978687127	0	10	600	100
597A	WITS 17	Stm attenuated	Feces	0	16.206	DH_20_013	GF	WT	99751000000	872.818	39.3633	600	100
597A	WITS 17	Stm attenuated	Cecum	3	33.9279	DH_20_013	GF	WT	4978687127	0	10	600	100
597A	WITS 19	Stm attenuated	Feces	0	18.4144	DH_20_013	GF	WT	99751000000	872.818	10	600	100
597A	WITS 19	Stm attenuated	Cecum	3	32.006	DH_20_013	GF	WT	4978687127	0	10	600	100
597A	WITS 21	Stm attenuated	Feces	0	12.5322	DH_20_013	GF	WT	99751000000	872.818	502.351	600	100
597A	WITS 21	Stm attenuated	Cecum	3	33.4611	DH_20_013	GF	WT	4978687127	0	10	600	100
598A	WITS 01	Stm attenuated	Feces	0	14.8038	DH_20_013	GF	WT	94787000000	1836.49	321.864	600	100
598A	WITS 01	Stm attenuated	Cecum	3	32.7261	DH_20_013	GF	WT	3886097152	0	10	600	100
598A	WITS 02	Stm attenuated	Feces	0	15.4778	DH_20_013	GF	WT	94787000000	1836.49	201.731	600	100
598A	WITS 02	Stm attenuated	Cecum	3	33.4943	DH_20_013	GF	WT	3886097152	0	10	600	100
598A	WITS 11	Stm attenuated	Feces	0	15.6426	DH_20_013	GF	WT	94787000000	1836.49	179.954	600	100
598A	WITS 11	Stm attenuated	Cecum	3	33.2295	DH_20_013	GF	WT	3886097152	0	10	600	100
598A	WITS 17	Stm attenuated	Feces	0	15.7341	DH_20_013	GF	WT	94787000000	1836.49	168.896	600	100
598A	WITS 17	Stm attenuated	Cecum	3	36.6866	DH_20_013	GF	WT	3886097152	0	10	600	100
598A	WITS 19	Stm attenuated	Feces	0	13.8069	DH_20_013	GF	WT	94787000000	1836.49	642.354	600	100
598A	WITS 19	Stm attenuated	Cecum	3	31.1604	DH_20_013	GF	WT	3886097152	0	10	600	100
598A	WITS 21	Stm attenuated	Feces	0	14.8045	DH_20_013	GF	WT	94787000000	1836.49	321.695	600	100
598A	WITS 21	Stm attenuated	Cecum	3	33.9986	DH_20_013	GF	WT	3886097152	0	10	600	100
599A	WITS 01	Stm attenuated	Feces	0	13.8306	DH_20_013	GF	WT	59016000000	1058.74	244.313	600	100
599A	WITS 01	Stm attenuated	Cecum	3	19.0289	DH_20_013	GF	WT	7570168404	0	10	600	100
599A	WITS 02	Stm attenuated	Feces	0	14.0057	DH_20_013	GF	WT	59016000000	1058.74	216.394	600	100
599A	WITS 02	Stm attenuated	Cecum	3	23.1405	DH_20_013	GF	WT	7570168404	0	10	600	100
599A	WITS 11	Stm attenuated	Feces	0	16.168	DH_20_013	GF	WT	59016000000	1058.74	48.343	600	100
599A	WITS 11	Stm attenuated	Cecum	3	18.0846	DH_20_013	GF	WT	7570168404	0	10	600	100
599A	WITS 17	Stm attenuated	Feces	0	15.4562	DH_20_013	GF	WT	59016000000	1058.74	79.1797	600	100
599A	WITS 17	Stm attenuated	Cecum	3	16.6636	DH_20_013	GF	WT	7570168404	0	10	600	100
599A	WITS 19	Stm attenuated	Feces	0	14.7283	DH_20_013	GF	WT	59016000000	1058.74	131.14	600	100
599A	WITS 19	Stm attenuated	Cecum	3	19.9096	DH_20_013	GF	WT	7570168404	0	10	600	100
599A	WITS 21	Stm attenuated	Feces	0	13.3565	DH_20_013	GF	WT	59016000000	1058.74	339.373	600	100
599A	WITS 21	Stm attenuated	Cecum	3	19.3655	DH_20_013	GF	WT	7570168404	0	10	600	100
600A	WITS 01	Stm attenuated	Feces	0	14.2051	DH_20_013	GF	WT	92884000000	1357.68	223.92	600	100
600A	WITS 01	Stm attenuated	Cecum	3	32.5178	DH_20_013	GF	WT	2686968204	0	10	600	100
600A	WITS 02	Stm attenuated	Feces	0	15.4833	DH_20_013	GF	WT	92884000000	1357.68	92.3249	600	100
600A	WITS 02	Stm attenuated	Cecum	3	33.6171	DH_20_013	GF	WT	2686968204	0	10	600	100
600A	WITS 11	Stm attenuated	Feces	0	15.0086	DH_20_013	GF	WT	92884000000	1357.68	128.292	600	100
600A	WITS 11	Stm attenuated	Cecum	3	31.1129	DH_20_013	GF	WT	2686968204	0	10	600	100
600A	WITS 17	Stm attenuated	Feces	0	15.339	DH_20_013	GF	WT	92884000000	1357.68	102.034	600	100
600A	WITS 17	Stm attenuated	Cecum	3	31.8282	DH_20_013	GF	WT	2686968204	0	10	600	100
600A	WITS 19	Stm attenuated	Feces	0	12.8686	DH_20_013	GF	WT	92884000000	1357.68	565.453	600	100
600A	WITS 19	Stm attenuated	Cecum	3	29.0924	DH_20_013	GF	WT	2686968204	0	10	600	100
600A	WITS 21	Stm attenuated	Feces	0	14.0714	DH_20_013	GF	WT	92884000000	1357.68	245.654	600	100
600A	WITS 21	Stm attenuated	Cecum	3	31.4661	DH_20_013	GF	WT	2686968204	0	10	600	100
601A	WITS 01	Stm attenuated	Feces	0	29.9118	DH_20_013	GF	WT	57971000000	301.932	10	600	100
601A	WITS 01	Stm attenuated	Cecum	3	31.1582	DH_20_013	GF	WT	4087591241	0	10	600	100
601A	WITS 02	Stm attenuated	Feces	0	13.9562	DH_20_013	GF	WT	57971000000	301.932	152.835	600	100
601A	WITS 02	Stm attenuated	Cecum	3	31.6844	DH_20_013	GF	WT	4087591241	0	10	600	100
601A	WITS 11	Stm attenuated	Feces	0	30.2347	DH_20_013	GF	WT	57971000000	301.932	10	600	100
601A	WITS 11	Stm attenuated	Cecum	3	31.5857	DH_20_013	GF	WT	4087591241	0	10	600	100
601A	WITS 17	Stm attenuated	Feces	0	29.7355	DH_20_013	GF	WT	57971000000	301.932	10	600	100
601A	WITS 17	Stm attenuated	Cecum	3	31.7505	DH_20_013	GF	WT	4087591241	0	10	600	100
601A	WITS 19	Stm attenuated	Feces	0	13.9919	DH_20_013	GF	WT	57971000000	301.932	149.097	600	100
601A	WITS 19	Stm attenuated	Cecum	3	30.4641	DH_20_013	GF	WT	4087591241	0	10	600	100
601A	WITS 21	Stm attenuated	Feces	0	29.5746	DH_20_013	GF	WT	57971000000	301.932	10	600	100
601A	WITS 21	Stm attenuated	Cecum	3	15.1921	DH_20_013	GF	WT	4087591241	0	10	600	100
592A	WITS 01	Stm avirulent	Feces	0	15.3902	DH_20_013	GF	WT	74262000000	791.139	86.4527	600	100
592A	WITS 01	Stm avirulent	Feces	3	17.7831	DH_20_013	GF	WT	27119000000	264.831	71.757	600	100
592A	WITS 01	Stm avirulent	Cecum	3	14.6045	DH_20_013	GF	WT	8665041971	243.704	72.8899	600	100
592A	WITS 02	Stm avirulent	Feces	0	14.446	DH_20_013	GF	WT	74262000000	791.139	166.351	600	100
592A	WITS 02	Stm avirulent	Feces	3	33.7113	DH_20_013	GF	WT	27119000000	264.831	10	600	100
592A	WITS 02	Stm avirulent	Cecum	3	17.6419	DH_20_013	GF	WT	8665041971	243.704	10	600	100
592A	WITS 11	Stm avirulent	Feces	0	14.6854	DH_20_013	GF	WT	74262000000	791.139	140.919	600	100
592A	WITS 11	Stm avirulent	Feces	3	34.3518	DH_20_013	GF	WT	27119000000	264.831	10	600	100
592A	WITS 11	Stm avirulent	Cecum	3	15.3145	DH_20_013	GF	WT	8665041971	243.704	44.5584	600	100
592A	WITS 17	Stm avirulent	Feces	0	14.2945	DH_20_013	GF	WT	74262000000	791.139	184.768	600	100
592A	WITS 17	Stm avirulent	Feces	3	35.098	DH_20_013	GF	WT	27119000000	264.831	10	600	100
592A	WITS 17	Stm avirulent	Cecum	3	17.3238	DH_20_013	GF	WT	8665041971	243.704	11.0685	600	100
592A	WITS 19	Stm avirulent	Feces	0	15.0352	DH_20_013	GF	WT	74262000000	791.139	110.578	600	100
592A	WITS 19	Stm avirulent	Feces	3	16.3551	DH_20_013	GF	WT	27119000000	264.831	193.073	600	100
592A	WITS 19	Stm avirulent	Cecum	3	14.7977	DH_20_013	GF	WT	8665041971	243.704	63.7546	600	100
592A	WITS 21	Stm avirulent	Feces	0	15.1507	DH_20_013	GF	WT	74262000000	791.139	102.07	600	100
592A	WITS 21	Stm avirulent	Feces	3	36.0448	DH_20_013	GF	WT	27119000000	264.831	10	600	100
592A	WITS 21	Stm avirulent	Cecum	3	15.3809	DH_20_013	GF	WT	8665041971	243.704	42.555	600	100
593A	WITS 01	Stm avirulent	Feces	0	13.0131	DH_20_013	GF	WT	59160000000	672.269	299.128	600	100
593A	WITS 01	Stm avirulent	Feces	3	28.8756	DH_20_013	GF	WT	33743000000	43.9367	10	600	100
593A	WITS 01	Stm avirulent	Cecum	3	13.9614	DH_20_013	GF	WT	11852000000	226.337	64.1455	600	100
593A	WITS 02	Stm avirulent	Feces	0	18.4929	DH_20_013	GF	WT	59160000000	672.269	10	600	100
593A	WITS 02	Stm avirulent	Feces	3	33.1518	DH_20_013	GF	WT	33743000000	43.9367	10	600	100
593A	WITS 02	Stm avirulent	Cecum	3	31.8094	DH_20_013	GF	WT	11852000000	226.337	10	600	100
593A	WITS 11	Stm avirulent	Feces	0	14.7376	DH_20_013	GF	WT	59160000000	672.269	90.5156	600	100
593A	WITS 11	Stm avirulent	Feces	3	33.8313	DH_20_013	GF	WT	33743000000	43.9367	10	600	100
593A	WITS 11	Stm avirulent	Cecum	3	17.621	DH_20_013	GF	WT	11852000000	226.337	10	600	100
593A	WITS 17	Stm avirulent	Feces	0	13.1296	DH_20_013	GF	WT	59160000000	672.269	275.922	600	100
593A	WITS 17	Stm avirulent	Feces	3	32.0747	DH_20_013	GF	WT	33743000000	43.9367	10	600	100
593A	WITS 17	Stm avirulent	Cecum	3	14.9042	DH_20_013	GF	WT	11852000000	226.337	33.3717	600	100
593A	WITS 19	Stm avirulent	Feces	0	29.3993	DH_20_013	GF	WT	59160000000	672.269	10	600	100
593A	WITS 19	Stm avirulent	Feces	3	33.4002	DH_20_013	GF	WT	33743000000	43.9367	10	600	100
593A	WITS 19	Stm avirulent	Cecum	3	32.6789	DH_20_013	GF	WT	11852000000	226.337	10	600	100
593A	WITS 21	Stm avirulent	Feces	0	32.0165	DH_20_013	GF	WT	59160000000	672.269	10	600	100
593A	WITS 21	Stm avirulent	Feces	3	15.5516	DH_20_013	GF	WT	33743000000	43.9367	43.9324	600	100
593A	WITS 21	Stm avirulent	Cecum	3	13.0135	DH_20_013	GF	WT	11852000000	226.337	123.744	600	100
594A	WITS 01	Stm avirulent	Feces	0	18.1821	DH_20_013	GF	WT	40336000000	892.857	10	600	100
594A	WITS 01	Stm avirulent	Feces	3	32.0963	DH_20_013	GF	WT	9169054441	143.266	10	600	100
594A	WITS 01	Stm avirulent	Cecum	3	32.8888	DH_20_013	GF	WT	9231576187	309.468	10	600	100
594A	WITS 02	Stm avirulent	Feces	0	16.2877	DH_20_013	GF	WT	40336000000	892.857	34.2738	600	100
594A	WITS 02	Stm avirulent	Feces	3	33.4318	DH_20_013	GF	WT	9169054441	143.266	10	600	100
594A	WITS 02	Stm avirulent	Cecum	3	16.2972	DH_20_013	GF	WT	9231576187	309.468	14.3778	600	100
594A	WITS 11	Stm avirulent	Feces	0	13.4445	DH_20_013	GF	WT	40336000000	892.857	245.958	600	100
594A	WITS 11	Stm avirulent	Feces	3	16.0542	DH_20_013	GF	WT	9169054441	143.266	99.0571	600	100
594A	WITS 11	Stm avirulent	Cecum	3	12.9887	DH_20_013	GF	WT	9231576187	309.468	142.439	600	100
594A	WITS 17	Stm avirulent	Feces	0	13.6223	DH_20_013	GF	WT	40336000000	892.857	217.439	600	100
594A	WITS 17	Stm avirulent	Feces	3	34.5737	DH_20_013	GF	WT	9169054441	143.266	10	600	100
594A	WITS 17	Stm avirulent	Cecum	3	33.999	DH_20_013	GF	WT	9231576187	309.468	10	600	100
594A	WITS 19	Stm avirulent	Feces	0	13.9025	DH_20_013	GF	WT	40336000000	892.857	179.05	600	100
594A	WITS 19	Stm avirulent	Feces	3	33.8534	DH_20_013	GF	WT	9169054441	143.266	10	600	100
594A	WITS 19	Stm avirulent	Cecum	3	14.94	DH_20_013	GF	WT	9231576187	309.468	36.8333	600	100
594A	WITS 21	Stm avirulent	Feces	0	13.6939	DH_20_013	GF	WT	40336000000	892.857	206.916	600	100
594A	WITS 21	Stm avirulent	Feces	3	17.2182	DH_20_013	GF	WT	9169054441	143.266	44.2093	600	100
594A	WITS 21	Stm avirulent	Cecum	3	13.2872	DH_20_013	GF	WT	9231576187	309.468	115.818	600	100
595A	WITS 01	Stm avirulent	Feces	0	18.9024	DH_20_013	GF	WT	37263000000	1382.82	24.5286	600	100
595A	WITS 01	Stm avirulent	Feces	3	29.5879	DH_20_013	GF	WT	33180000000	460.829	10	600	100
595A	WITS 01	Stm avirulent	Cecum	3	15.249	DH_20_013	GF	WT	11925000000	287.267	39.1256	600	100
595A	WITS 02	Stm avirulent	Feces	0	17.3024	DH_20_013	GF	WT	37263000000	1382.82	74.3574	600	100
595A	WITS 02	Stm avirulent	Feces	3	31.8622	DH_20_013	GF	WT	33180000000	460.829	10	600	100
595A	WITS 02	Stm avirulent	Cecum	3	15.2	DH_20_013	GF	WT	11925000000	287.267	40.4748	600	100
595A	WITS 11	Stm avirulent	Feces	0	15.1478	DH_20_013	GF	WT	37263000000	1382.82	331.06	600	100
595A	WITS 11	Stm avirulent	Feces	3	16.551	DH_20_013	GF	WT	33180000000	460.829	261.927	600	100
595A	WITS 11	Stm avirulent	Cecum	3	13.6507	DH_20_013	GF	WT	11925000000	287.267	118.466	600	100
595A	WITS 17	Stm avirulent	Feces	0	15.59	DH_20_013	GF	WT	37263000000	1382.82	243.678	600	100
595A	WITS 17	Stm avirulent	Feces	3	20.0737	DH_20_013	GF	WT	33180000000	460.829	22.7889	600	100
595A	WITS 17	Stm avirulent	Cecum	3	34.7327	DH_20_013	GF	WT	11925000000	287.267	10	600	100
595A	WITS 19	Stm avirulent	Feces	0	15.5742	DH_20_013	GF	WT	37263000000	1382.82	246.358	600	100
595A	WITS 19	Stm avirulent	Feces	3	31.8217	DH_20_013	GF	WT	33180000000	460.829	10	600	100
595A	WITS 19	Stm avirulent	Cecum	3	14.3143	DH_20_013	GF	WT	11925000000	287.267	74.7879	600	100
595A	WITS 21	Stm avirulent	Feces	0	14.6644	DH_20_013	GF	WT	37263000000	1382.82	462.842	600	100
595A	WITS 21	Stm avirulent	Feces	3	17.1236	DH_20_013	GF	WT	33180000000	460.829	176.114	600	100
595A	WITS 21	Stm avirulent	Cecum	3	16.6898	DH_20_013	GF	WT	11925000000	287.267	14.4125	600	100
596A	WITS 01	Stm avirulent	Feces	0	16.0821	DH_20_013	GF	WT	77838000000	1959.46	94.9215	600	100
596A	WITS 01	Stm avirulent	Feces	3	15.4818	DH_20_013	GF	WT	18433000000	1497.7	1011.32	600	100
596A	WITS 01	Stm avirulent	Cecum	3	14.0757	DH_20_013	GF	WT	8038854463	473.957	88.8859	600	100
596A	WITS 02	Stm avirulent	Feces	0	13.8928	DH_20_013	GF	WT	77838000000	1959.46	432.914	600	100
596A	WITS 02	Stm avirulent	Feces	3	19.2796	DH_20_013	GF	WT	18433000000	1497.7	72.7186	600	100
596A	WITS 02	Stm avirulent	Cecum	3	15.0936	DH_20_013	GF	WT	8038854463	473.957	43.8967	600	100
596A	WITS 11	Stm avirulent	Feces	0	14.4431	DH_20_013	GF	WT	77838000000	1959.46	295.627	600	100
596A	WITS 11	Stm avirulent	Feces	3	17.5277	DH_20_013	GF	WT	18433000000	1497.7	244.92	600	100
596A	WITS 11	Stm avirulent	Cecum	3	13.6452	DH_20_013	GF	WT	8038854463	473.957	119.798	600	100
596A	WITS 17	Stm avirulent	Feces	0	16.6014	DH_20_013	GF	WT	77838000000	1959.46	66.2273	600	100
596A	WITS 17	Stm avirulent	Feces	3	37.9098	DH_20_013	GF	WT	18433000000	1497.7	10	600	100
596A	WITS 17	Stm avirulent	Cecum	3	17.1974	DH_20_013	GF	WT	8038854463	473.957	10.2123	600	100
596A	WITS 19	Stm avirulent	Feces	0	13.7628	DH_20_013	GF	WT	77838000000	1959.46	473.762	600	100
596A	WITS 19	Stm avirulent	Feces	3	20.0326	DH_20_013	GF	WT	18433000000	1497.7	43.1493	600	100
596A	WITS 19	Stm avirulent	Cecum	3	14.7126	DH_20_013	GF	WT	8038854463	473.957	57.1631	600	100
596A	WITS 21	Stm avirulent	Feces	0	13.4316	DH_20_013	GF	WT	77838000000	1959.46	596.008	600	100
596A	WITS 21	Stm avirulent	Feces	3	18.4912	DH_20_013	GF	WT	18433000000	1497.7	125.592	600	100
596A	WITS 21	Stm avirulent	Cecum	3	13.2828	DH_20_013	GF	WT	8038854463	473.957	154.001	600	100
Ino	WITS 01	NA	Inoculum	NA	12.3535	DH_19_041	NA	WT	NA	NA	64.6429	400	66.6667
Ino	WITS 02	NA	Inoculum	NA	13.1745	DH_19_041	NA	WT	NA	NA	36.5911	400	66.6667
Ino	WITS 11	NA	Inoculum	NA	13.014	DH_19_041	NA	WT	NA	NA	40.8969	400	66.6667
Ino	WITS 17	NA	Inoculum	NA	11.1335	DH_19_041	NA	WT	NA	NA	150.583	400	66.6667
Ino	WITS 19	NA	Inoculum	NA	13.0885	DH_19_041	NA	WT	NA	NA	38.8386	400	66.6667
Ino	WITS 21	NA	Inoculum	NA	12.271	DH_19_041	NA	WT	NA	NA	68.4472	400	66.6667
Ino	WITS 01	NA	Inoculum	NA	13.144	DH_20_002	NA	WT	NA	NA	36.7456	190	31.6667
Ino	WITS 02	NA	Inoculum	NA	14.003	DH_20_002	NA	WT	NA	NA	20.2591	190	31.6667
Ino	WITS 11	NA	Inoculum	NA	13.9195	DH_20_002	NA	WT	NA	NA	21.4663	190	31.6667
Ino	WITS 17	NA	Inoculum	NA	12.9375	DH_20_002	NA	WT	NA	NA	42.4002	190	31.6667
Ino	WITS 19	NA	Inoculum	NA	12.8975	DH_20_002	NA	WT	NA	NA	43.5922	190	31.6667
Ino	WITS 21	NA	Inoculum	NA	13.669	DH_20_002	NA	WT	NA	NA	25.5367	190	31.6667
Ino	WITS 01	NA	Inoculum	NA	15.227	DH_20_021	GF	WT	NA	NA	427.179	900	150
Ino	WITS 02	NA	Inoculum	NA	17.3055	DH_20_021	GF	WT	NA	NA	101.139	900	150
Ino	WITS 11	NA	Inoculum	NA	16.828	DH_20_021	GF	WT	NA	NA	140.819	900	150
Ino	WITS 17	NA	Inoculum	NA	17.693	DH_20_021	GF	WT	NA	NA	77.3162	900	150
Ino	WITS 19	NA	Inoculum	NA	17.891	DH_20_021	GF	WT	NA	NA	67.401	900	150
Ino	WITS 21	NA	Inoculum	NA	17.537	DH_20_021	GF	WT	NA	NA	86.1452	900	150
Ino	WITS 01	NA	Inoculum	NA	14.0762	DH_20_013	GF	WT	NA	NA	218.991	600	100
Ino	WITS 02	NA	Inoculum	NA	15.8369	DH_20_013	GF	WT	NA	NA	64.6285	600	100
Ino	WITS 11	NA	Inoculum	NA	15.7943	DH_20_013	GF	WT	NA	NA	66.562	600	100
Ino	WITS 17	NA	Inoculum	NA	15.7829	DH_20_013	GF	WT	NA	NA	67.0909	600	100
Ino	WITS 19	NA	Inoculum	NA	15.3966	DH_20_013	GF	WT	NA	NA	87.6922	600	100
Ino	WITS 21	NA	Inoculum	NA	15.2806	DH_20_013	GF	WT	NA	NA	95.0357	600	100

## Sheet: Fig4-Supp2
Stm load			Lipocalin-2 in Cecum at day 3
Avirulent	Attenuated		Control	Avirulent	Attenuated
893000000	3550000000		3.25175	3.43099	42.6209
2590000000	1420000000		3.26685	2.14696	67.7802
2010000000	1550000000			2.04909	150.968
6120000000	3640000000			2.52345	116.039
